# Supplementary material for: Dynamic Regulation Genes at Microtubule Plus Ends: A Novel Class of Glioma Biomarkers
Source: Biology (Basel). 2023 Mar 22;12(3):488. doi: 10.3390/biology12030488 (PMC10045452; doi:10.3390/biology12030488)
Supplement: Supplementary file 1 [file biology-12-00488-s001.zip › Supplementary Tables.xlsx]

## Sheet: Table S1
Table S1. Other gene mutation frequencies in MPERG mutant group and non-mutant group. Related to Figure 2B.
Gene	Mutant group (93)	Non-mutant group (483)	p-Value	Enriched in
R3HDM1	3 (9.68%)	0 (0.00%)	0.0001998	Mutant group
CIC	5 (5.38%)	52 (20.39%)	0.0002932	Non-mutant group
ADAMTSL3	4 (4.30%)	0 (0.00%)	0.0006433	Mutant group
ALDH3A1	4 (4.30%)	0 (0.00%)	0.0006433	Mutant group
HTR3E	3 (4.84%)	0 (0.00%)	0.00141	Mutant group
TNK2	3 (4.84%)	0 (0.00%)	0.00141	Mutant group
UNC13C	4 (6.45%)	2 (0.41%)	0.001924	Mutant group
HGD	2 (6.45%)	0 (0.00%)	0.003527	Mutant group
IKBKE	2 (6.45%)	0 (0.00%)	0.003527	Mutant group
NEK8	2 (6.45%)	0 (0.00%)	0.003527	Mutant group
TBCK	2 (6.45%)	0 (0.00%)	0.003527	Mutant group
TC2N	2 (6.45%)	0 (0.00%)	0.003527	Mutant group
TOGARAM2	2 (6.45%)	0 (0.00%)	0.003527	Mutant group
ZNF385B	2 (6.45%)	0 (0.00%)	0.003527	Mutant group
RELN	6 (9.68%)	9 (1.86%)	0.003761	Mutant group
ACAD11	3 (3.23%)	0 (0.00%)	0.004096	Mutant group
ARHGAP6	3 (3.23%)	0 (0.00%)	0.004096	Mutant group
DNAJC16	3 (3.23%)	0 (0.00%)	0.004096	Mutant group
EFR3A	3 (3.23%)	0 (0.00%)	0.004096	Mutant group
GRK3	3 (3.23%)	0 (0.00%)	0.004096	Mutant group
KDM6B	3 (3.23%)	0 (0.00%)	0.004096	Mutant group
RIN3	3 (3.23%)	0 (0.00%)	0.004096	Mutant group
SLC4A2	3 (3.23%)	0 (0.00%)	0.004096	Mutant group
ZNF644	3 (3.23%)	0 (0.00%)	0.004096	Mutant group
TENM4	4 (6.45%)	1 (0.44%)	0.008096	Mutant group
ABCA4	3 (4.84%)	2 (0.41%)	0.0119	Mutant group
CYP4A11	3 (4.84%)	2 (0.41%)	0.0119	Mutant group
PKHD1	7 (11.29%)	17 (3.52%)	0.0127	Mutant group
ACP6	2 (3.23%)	0 (0.00%)	0.0128	Mutant group
ACTBL2	2 (3.23%)	0 (0.00%)	0.0128	Mutant group
ADAP1	2 (3.23%)	0 (0.00%)	0.0128	Mutant group
ADD1	2 (3.23%)	0 (0.00%)	0.0128	Mutant group
AGAP7P	2 (3.23%)	0 (0.00%)	0.0128	Mutant group
AOC2	2 (3.23%)	0 (0.00%)	0.0128	Mutant group
ARHGAP25	2 (3.23%)	0 (0.00%)	0.0128	Mutant group
ARHGEF7	2 (3.23%)	0 (0.00%)	0.0128	Mutant group
ARID3B	2 (3.23%)	0 (0.00%)	0.0128	Mutant group
ARL6	2 (3.23%)	0 (0.00%)	0.0128	Mutant group
BLTP3A	2 (3.23%)	0 (0.00%)	0.0128	Mutant group
CCDC150	2 (3.23%)	0 (0.00%)	0.0128	Mutant group
CCDC7	2 (3.23%)	0 (0.00%)	0.0128	Mutant group
CD5	2 (3.23%)	0 (0.00%)	0.0128	Mutant group
CDAN1	2 (3.23%)	0 (0.00%)	0.0128	Mutant group
CHML	2 (3.23%)	0 (0.00%)	0.0128	Mutant group
CLDN25	2 (3.23%)	0 (0.00%)	0.0128	Mutant group
CORIN	2 (3.23%)	0 (0.00%)	0.0128	Mutant group
CRB1	2 (3.23%)	0 (0.00%)	0.0128	Mutant group
CTSF	2 (3.23%)	0 (0.00%)	0.0128	Mutant group
DNALI1	2 (3.23%)	0 (0.00%)	0.0128	Mutant group
EIF4H	2 (3.23%)	0 (0.00%)	0.0128	Mutant group
EPS15	2 (3.23%)	0 (0.00%)	0.0128	Mutant group
EPS15L1	2 (3.23%)	0 (0.00%)	0.0128	Mutant group
FMO3	2 (3.23%)	0 (0.00%)	0.0128	Mutant group
FOXA3	2 (3.23%)	0 (0.00%)	0.0128	Mutant group
HSPBAP1	2 (3.23%)	0 (0.00%)	0.0128	Mutant group
IGSF3	2 (3.23%)	0 (0.00%)	0.0128	Mutant group
IL21R	2 (3.23%)	0 (0.00%)	0.0128	Mutant group
IRF8	2 (3.23%)	0 (0.00%)	0.0128	Mutant group
ITIH5	2 (3.23%)	0 (0.00%)	0.0128	Mutant group
JAK1	2 (3.23%)	0 (0.00%)	0.0128	Mutant group
KHDC4	2 (3.23%)	0 (0.00%)	0.0128	Mutant group
KIF17	2 (3.23%)	0 (0.00%)	0.0128	Mutant group
KIR2DS4	2 (3.23%)	0 (0.00%)	0.0128	Mutant group
LHX9	2 (3.23%)	0 (0.00%)	0.0128	Mutant group
LLGL1	2 (3.23%)	0 (0.00%)	0.0128	Mutant group
MAGI1	2 (3.23%)	0 (0.00%)	0.0128	Mutant group
MCM5	2 (3.23%)	0 (0.00%)	0.0128	Mutant group
MMP27	2 (3.23%)	0 (0.00%)	0.0128	Mutant group
MTMR1	2 (3.23%)	0 (0.00%)	0.0128	Mutant group
NR1I3	2 (3.23%)	0 (0.00%)	0.0128	Mutant group
NR2C1	2 (3.23%)	0 (0.00%)	0.0128	Mutant group
OR56A3	2 (3.23%)	0 (0.00%)	0.0128	Mutant group
OVCH1	2 (3.23%)	0 (0.00%)	0.0128	Mutant group
PALLD	2 (3.23%)	0 (0.00%)	0.0128	Mutant group
PCDHGA9	2 (3.23%)	0 (0.00%)	0.0128	Mutant group
PHF20L1	2 (3.23%)	0 (0.00%)	0.0128	Mutant group
PLEKHA7	2 (3.23%)	0 (0.00%)	0.0128	Mutant group
POLR1A	2 (3.23%)	0 (0.00%)	0.0128	Mutant group
PRKCSH	2 (3.23%)	0 (0.00%)	0.0128	Mutant group
PTPN22	2 (3.23%)	0 (0.00%)	0.0128	Mutant group
SEC23IP	2 (3.23%)	0 (0.00%)	0.0128	Mutant group
SEC24B	2 (3.23%)	0 (0.00%)	0.0128	Mutant group
SEPTIN10	2 (3.23%)	0 (0.00%)	0.0128	Mutant group
SF3B2	2 (3.23%)	0 (0.00%)	0.0128	Mutant group
SMC1B	2 (3.23%)	0 (0.00%)	0.0128	Mutant group
SMURF1	2 (3.23%)	0 (0.00%)	0.0128	Mutant group
SYMPK	2 (3.23%)	0 (0.00%)	0.0128	Mutant group
TDP2	2 (3.23%)	0 (0.00%)	0.0128	Mutant group
TDRD7	2 (3.23%)	0 (0.00%)	0.0128	Mutant group
TMEM255A	2 (3.23%)	0 (0.00%)	0.0128	Mutant group
TMPRSS9	2 (3.23%)	0 (0.00%)	0.0128	Mutant group
TNFRSF8	2 (3.23%)	0 (0.00%)	0.0128	Mutant group
TPCN1	2 (3.23%)	0 (0.00%)	0.0128	Mutant group
TRIM42	2 (3.23%)	0 (0.00%)	0.0128	Mutant group
TSHZ3	2 (3.23%)	0 (0.00%)	0.0128	Mutant group
UNKL	2 (3.23%)	0 (0.00%)	0.0128	Mutant group
VPS18	2 (3.23%)	0 (0.00%)	0.0128	Mutant group
ZBP1	2 (3.23%)	0 (0.00%)	0.0128	Mutant group
ZCCHC14	2 (3.23%)	0 (0.00%)	0.0128	Mutant group
ZNF274	2 (3.23%)	0 (0.00%)	0.0128	Mutant group
SYNE1	6 (9.68%)	13 (2.69%)	0.0141	Mutant group
EPB41L3	4 (4.30%)	3 (0.62%)	0.0151	Mutant group
SPTA1	3 (3.23%)	25 (10.96%)	0.0166	Non-mutant group
ABCA7	4 (4.30%)	1 (0.39%)	0.0193	Mutant group
ACSL1	2 (6.45%)	2 (0.41%)	0.0196	Mutant group
KIAA1549L	2 (6.45%)	2 (0.41%)	0.0196	Mutant group
MYO7A	2 (6.45%)	2 (0.41%)	0.0196	Mutant group
DRD5	5 (5.38%)	6 (1.24%)	0.0204	Mutant group
OR5A1	3 (4.84%)	3 (0.62%)	0.0219	Mutant group
PREX1	3 (4.84%)	3 (0.62%)	0.0219	Mutant group
IDH2	0 (0.00%)	12 (4.71%)	0.0223	Non-mutant group
PIK3C2G	5 (8.06%)	4 (1.75%)	0.0239	Mutant group
ABCA3	2 (2.15%)	0 (0.00%)	0.0258	Mutant group
ACADVL	2 (2.15%)	0 (0.00%)	0.0258	Mutant group
ARHGAP30	2 (2.15%)	0 (0.00%)	0.0258	Mutant group
ASIC3	2 (2.15%)	0 (0.00%)	0.0258	Mutant group
AURKA	2 (2.15%)	0 (0.00%)	0.0258	Mutant group
C19ORF48	2 (2.15%)	0 (0.00%)	0.0258	Mutant group
CCDC148	2 (2.15%)	0 (0.00%)	0.0258	Mutant group
CDC73	2 (2.15%)	0 (0.00%)	0.0258	Mutant group
CEP41	2 (2.15%)	0 (0.00%)	0.0258	Mutant group
CTNNB1	2 (2.15%)	0 (0.00%)	0.0258	Mutant group
DDX31	2 (2.15%)	0 (0.00%)	0.0258	Mutant group
DNAAF4	2 (2.15%)	0 (0.00%)	0.0258	Mutant group
ECPAS	2 (2.15%)	0 (0.00%)	0.0258	Mutant group
FZR1	2 (2.15%)	0 (0.00%)	0.0258	Mutant group
GAK	2 (2.15%)	0 (0.00%)	0.0258	Mutant group
GALNT18	2 (2.15%)	0 (0.00%)	0.0258	Mutant group
HCRTR2	2 (2.15%)	0 (0.00%)	0.0258	Mutant group
HS3ST4	2 (2.15%)	0 (0.00%)	0.0258	Mutant group
ITGA8	2 (2.15%)	0 (0.00%)	0.0258	Mutant group
KANK3	2 (2.15%)	0 (0.00%)	0.0258	Mutant group
LARGE2	2 (2.15%)	0 (0.00%)	0.0258	Mutant group
MAPK15	2 (2.15%)	0 (0.00%)	0.0258	Mutant group
MBD4	2 (2.15%)	0 (0.00%)	0.0258	Mutant group
MCOLN1	2 (2.15%)	0 (0.00%)	0.0258	Mutant group
MED13L	2 (2.15%)	0 (0.00%)	0.0258	Mutant group
METTL25B	2 (2.15%)	0 (0.00%)	0.0258	Mutant group
MYL10	2 (2.15%)	0 (0.00%)	0.0258	Mutant group
OPRD1	2 (2.15%)	0 (0.00%)	0.0258	Mutant group
PCDHA6	2 (2.15%)	0 (0.00%)	0.0258	Mutant group
PCDHGA7	2 (2.15%)	0 (0.00%)	0.0258	Mutant group
PITPNM2	2 (2.15%)	0 (0.00%)	0.0258	Mutant group
PLAGL2	2 (2.15%)	0 (0.00%)	0.0258	Mutant group
POLE	2 (2.15%)	0 (0.00%)	0.0258	Mutant group
PTAFR	2 (2.15%)	0 (0.00%)	0.0258	Mutant group
PTN	2 (2.15%)	0 (0.00%)	0.0258	Mutant group
RABL6	2 (2.15%)	0 (0.00%)	0.0258	Mutant group
RHBDD1	2 (2.15%)	0 (0.00%)	0.0258	Mutant group
RIC1	2 (2.15%)	0 (0.00%)	0.0258	Mutant group
RIPOR1	2 (2.15%)	0 (0.00%)	0.0258	Mutant group
RNF144A	2 (2.15%)	0 (0.00%)	0.0258	Mutant group
SLC19A1	2 (2.15%)	0 (0.00%)	0.0258	Mutant group
SLC1A7	2 (2.15%)	0 (0.00%)	0.0258	Mutant group
SLC25A36	2 (2.15%)	0 (0.00%)	0.0258	Mutant group
SLC5A5	2 (2.15%)	0 (0.00%)	0.0258	Mutant group
TMEM164	2 (2.15%)	0 (0.00%)	0.0258	Mutant group
WDR44	2 (2.15%)	0 (0.00%)	0.0258	Mutant group
ZDHHC11	2 (2.15%)	0 (0.00%)	0.0258	Mutant group
ZNF182	2 (2.15%)	0 (0.00%)	0.0258	Mutant group
ZNF630	2 (2.15%)	0 (0.00%)	0.0258	Mutant group
AKAP9	4 (4.30%)	4 (0.83%)	0.0266	Mutant group
SCN7A	4 (4.30%)	4 (0.83%)	0.0266	Mutant group
TRPV5	4 (4.30%)	4 (0.83%)	0.0266	Mutant group
UTRN	4 (4.30%)	4 (0.83%)	0.0266	Mutant group
RB1	7 (11.29%)	21 (4.35%)	0.03	Mutant group
AADACL2	2 (6.45%)	3 (0.62%)	0.0314	Mutant group
FRK	2 (6.45%)	3 (0.62%)	0.0314	Mutant group
PRX	2 (6.45%)	3 (0.62%)	0.0314	Mutant group
SON	2 (6.45%)	3 (0.62%)	0.0314	Mutant group
TDG	2 (6.45%)	3 (0.62%)	0.0314	Mutant group
ABCD2	3 (4.84%)	1 (0.44%)	0.0318	Mutant group
SLC27A6	3 (4.84%)	1 (0.44%)	0.0318	Mutant group
UGT2A1	3 (4.84%)	1 (0.44%)	0.0318	Mutant group
CREB3	2 (6.45%)	1 (0.39%)	0.0319	Mutant group
DLX5	2 (6.45%)	1 (0.39%)	0.0319	Mutant group
EFEMP2	2 (6.45%)	1 (0.39%)	0.0319	Mutant group
LILRA1	2 (6.45%)	1 (0.39%)	0.0319	Mutant group
MYO1F	2 (6.45%)	1 (0.39%)	0.0319	Mutant group
GRIA1	3 (3.23%)	2 (0.41%)	0.0319	Mutant group
HDAC2	3 (3.23%)	2 (0.41%)	0.0319	Mutant group
HELZ	3 (3.23%)	2 (0.41%)	0.0319	Mutant group
NBEAL2	3 (3.23%)	2 (0.41%)	0.0319	Mutant group
PLCE1	3 (3.23%)	2 (0.41%)	0.0319	Mutant group
TIE1	3 (3.23%)	2 (0.41%)	0.0319	Mutant group
ZMYM3	3 (3.23%)	2 (0.41%)	0.0319	Mutant group
ANK1	3 (4.84%)	4 (0.83%)	0.0352	Mutant group
ITGAX	3 (4.84%)	4 (0.83%)	0.0352	Mutant group
PEG3	3 (4.84%)	4 (0.83%)	0.0352	Mutant group
TLR6	3 (4.84%)	4 (0.83%)	0.0352	Mutant group
ABCC9	4 (6.45%)	8 (1.66%)	0.0373	Mutant group
LZTR1	4 (6.45%)	8 (1.66%)	0.0373	Mutant group
CCNA1	2 (6.45%)	1 (0.44%)	0.0386	Mutant group
HEPH	2 (6.45%)	1 (0.44%)	0.0386	Mutant group
KIF25	2 (6.45%)	1 (0.44%)	0.0386	Mutant group
NT5DC3	2 (6.45%)	1 (0.44%)	0.0386	Mutant group
PEAR1	2 (6.45%)	1 (0.44%)	0.0386	Mutant group
SLC38A10	2 (6.45%)	1 (0.44%)	0.0386	Mutant group
MYO1B	4 (6.45%)	3 (1.32%)	0.0399	Mutant group
AK7	4 (4.30%)	5 (1.04%)	0.042	Mutant group
ADAM29	0 (0.00%)	9 (3.95%)	0.0439	Non-mutant group
SERPINB7	2 (6.45%)	4 (0.83%)	0.0454	Mutant group
VPS13B	2 (6.45%)	4 (0.83%)	0.0454	Mutant group
USP11	4 (4.30%)	2 (0.78%)	0.046	Mutant group
FLG2	4 (6.45%)	9 (1.86%)	0.0494	Mutant group
ABCB4	3 (4.84%)	5 (1.04%)	0.0518	Mutant group
CALN1	3 (4.84%)	5 (1.04%)	0.0518	Mutant group
HELZ2	3 (4.84%)	5 (1.04%)	0.0518	Mutant group
NLRP3	3 (4.84%)	5 (1.04%)	0.0518	Mutant group
PPP1R3A	3 (4.84%)	5 (1.04%)	0.0518	Mutant group
ADAM28	3 (3.23%)	3 (0.62%)	0.0564	Mutant group
DMBT1	3 (3.23%)	3 (0.62%)	0.0564	Mutant group
TRIM58	3 (3.23%)	3 (0.62%)	0.0564	Mutant group
DNMT3A	2 (6.45%)	2 (0.78%)	0.0595	Mutant group
APOBR	3 (3.23%)	1 (0.39%)	0.06	Mutant group
ARID2	3 (3.23%)	1 (0.39%)	0.06	Mutant group
DIS3L2	3 (3.23%)	1 (0.39%)	0.06	Mutant group
QSER1	3 (3.23%)	1 (0.39%)	0.06	Mutant group
REV1	3 (3.23%)	1 (0.39%)	0.06	Mutant group
AASDHPPT	1 (3.23%)	0 (0.00%)	0.0603	Mutant group
ABAT	1 (3.23%)	0 (0.00%)	0.0603	Mutant group
ABCA2	1 (3.23%)	0 (0.00%)	0.0603	Mutant group
ABCE1	1 (3.23%)	0 (0.00%)	0.0603	Mutant group
ABHD16B	1 (3.23%)	0 (0.00%)	0.0603	Mutant group
ACSF3	1 (3.23%)	0 (0.00%)	0.0603	Mutant group
ACSS3	1 (3.23%)	0 (0.00%)	0.0603	Mutant group
ADAMTS14	1 (3.23%)	0 (0.00%)	0.0603	Mutant group
ADIPOR1	1 (3.23%)	0 (0.00%)	0.0603	Mutant group
AGK	1 (3.23%)	0 (0.00%)	0.0603	Mutant group
AGXT2	1 (3.23%)	0 (0.00%)	0.0603	Mutant group
AIPL1	1 (3.23%)	0 (0.00%)	0.0603	Mutant group
ALG14	1 (3.23%)	0 (0.00%)	0.0603	Mutant group
AMZ2	1 (3.23%)	0 (0.00%)	0.0603	Mutant group
ANXA7	1 (3.23%)	0 (0.00%)	0.0603	Mutant group
AP5S1	1 (3.23%)	0 (0.00%)	0.0603	Mutant group
APOL4	1 (3.23%)	0 (0.00%)	0.0603	Mutant group
APRG1	1 (3.23%)	0 (0.00%)	0.0603	Mutant group
AQP4	1 (3.23%)	0 (0.00%)	0.0603	Mutant group
ARAP1	1 (3.23%)	0 (0.00%)	0.0603	Mutant group
ARHGAP22	1 (3.23%)	0 (0.00%)	0.0603	Mutant group
ARRDC5	1 (3.23%)	0 (0.00%)	0.0603	Mutant group
ASB4	1 (3.23%)	0 (0.00%)	0.0603	Mutant group
ATMIN	1 (3.23%)	0 (0.00%)	0.0603	Mutant group
ATOSA	1 (3.23%)	0 (0.00%)	0.0603	Mutant group
ATP12A	1 (3.23%)	0 (0.00%)	0.0603	Mutant group
BAX	1 (3.23%)	0 (0.00%)	0.0603	Mutant group
BBS1	1 (3.23%)	0 (0.00%)	0.0603	Mutant group
BBS10	1 (3.23%)	0 (0.00%)	0.0603	Mutant group
BCAT2	1 (3.23%)	0 (0.00%)	0.0603	Mutant group
BIN1	1 (3.23%)	0 (0.00%)	0.0603	Mutant group
BNIP5	1 (3.23%)	0 (0.00%)	0.0603	Mutant group
BRD1	1 (3.23%)	0 (0.00%)	0.0603	Mutant group
BTBD2	1 (3.23%)	0 (0.00%)	0.0603	Mutant group
BTG4	1 (3.23%)	0 (0.00%)	0.0603	Mutant group
BZW1	1 (3.23%)	0 (0.00%)	0.0603	Mutant group
C16ORF92	1 (3.23%)	0 (0.00%)	0.0603	Mutant group
C3ORF18	1 (3.23%)	0 (0.00%)	0.0603	Mutant group
C8ORF74	1 (3.23%)	0 (0.00%)	0.0603	Mutant group
CAPN3	1 (3.23%)	0 (0.00%)	0.0603	Mutant group
CASTOR1	1 (3.23%)	0 (0.00%)	0.0603	Mutant group
CATSPERE	1 (3.23%)	0 (0.00%)	0.0603	Mutant group
CBLN4	1 (3.23%)	0 (0.00%)	0.0603	Mutant group
CCDC153	1 (3.23%)	0 (0.00%)	0.0603	Mutant group
CCDC181	1 (3.23%)	0 (0.00%)	0.0603	Mutant group
CCL20	1 (3.23%)	0 (0.00%)	0.0603	Mutant group
CCNG2	1 (3.23%)	0 (0.00%)	0.0603	Mutant group
CDC14B	1 (3.23%)	0 (0.00%)	0.0603	Mutant group
CDC16	1 (3.23%)	0 (0.00%)	0.0603	Mutant group
CDH10	1 (3.23%)	0 (0.00%)	0.0603	Mutant group
CDT1	1 (3.23%)	0 (0.00%)	0.0603	Mutant group
CENATAC	1 (3.23%)	0 (0.00%)	0.0603	Mutant group
CENPK	1 (3.23%)	0 (0.00%)	0.0603	Mutant group
CETN1	1 (3.23%)	0 (0.00%)	0.0603	Mutant group
CETN3	1 (3.23%)	0 (0.00%)	0.0603	Mutant group
CHIA	1 (3.23%)	0 (0.00%)	0.0603	Mutant group
CHRNE	1 (3.23%)	0 (0.00%)	0.0603	Mutant group
CHST11	1 (3.23%)	0 (0.00%)	0.0603	Mutant group
CLEC4D	1 (3.23%)	0 (0.00%)	0.0603	Mutant group
CLPTM1L	1 (3.23%)	0 (0.00%)	0.0603	Mutant group
CLU	1 (3.23%)	0 (0.00%)	0.0603	Mutant group
CNNM1	1 (3.23%)	0 (0.00%)	0.0603	Mutant group
COLEC11	1 (3.23%)	0 (0.00%)	0.0603	Mutant group
COQ3	1 (3.23%)	0 (0.00%)	0.0603	Mutant group
CRLF2	1 (3.23%)	0 (0.00%)	0.0603	Mutant group
CRX	1 (3.23%)	0 (0.00%)	0.0603	Mutant group
CRYAA	1 (3.23%)	0 (0.00%)	0.0603	Mutant group
CSH1	1 (3.23%)	0 (0.00%)	0.0603	Mutant group
CSTF3	1 (3.23%)	0 (0.00%)	0.0603	Mutant group
CXCR4	1 (3.23%)	0 (0.00%)	0.0603	Mutant group
CYP4V2	1 (3.23%)	0 (0.00%)	0.0603	Mutant group
CYTH3	1 (3.23%)	0 (0.00%)	0.0603	Mutant group
DAPK3	1 (3.23%)	0 (0.00%)	0.0603	Mutant group
DARS2	1 (3.23%)	0 (0.00%)	0.0603	Mutant group
DCAKD	1 (3.23%)	0 (0.00%)	0.0603	Mutant group
DDN	1 (3.23%)	0 (0.00%)	0.0603	Mutant group
DHTKD1	1 (3.23%)	0 (0.00%)	0.0603	Mutant group
DHX37	1 (3.23%)	0 (0.00%)	0.0603	Mutant group
DISP2	1 (3.23%)	0 (0.00%)	0.0603	Mutant group
DLG3	1 (3.23%)	0 (0.00%)	0.0603	Mutant group
DMKN	1 (3.23%)	0 (0.00%)	0.0603	Mutant group
DMTN	1 (3.23%)	0 (0.00%)	0.0603	Mutant group
DNAAF5	1 (3.23%)	0 (0.00%)	0.0603	Mutant group
DOHH	1 (3.23%)	0 (0.00%)	0.0603	Mutant group
DYM	1 (3.23%)	0 (0.00%)	0.0603	Mutant group
EEF1D	1 (3.23%)	0 (0.00%)	0.0603	Mutant group
EFEMP1	1 (3.23%)	0 (0.00%)	0.0603	Mutant group
EFL1	1 (3.23%)	0 (0.00%)	0.0603	Mutant group
EHMT1	1 (3.23%)	0 (0.00%)	0.0603	Mutant group
ELF3	1 (3.23%)	0 (0.00%)	0.0603	Mutant group
ENKD1	1 (3.23%)	0 (0.00%)	0.0603	Mutant group
ERI3	1 (3.23%)	0 (0.00%)	0.0603	Mutant group
FAHD2B	1 (3.23%)	0 (0.00%)	0.0603	Mutant group
FAM120B	1 (3.23%)	0 (0.00%)	0.0603	Mutant group
FAM174A	1 (3.23%)	0 (0.00%)	0.0603	Mutant group
FAM217B	1 (3.23%)	0 (0.00%)	0.0603	Mutant group
FAM220A	1 (3.23%)	0 (0.00%)	0.0603	Mutant group
FAM50A	1 (3.23%)	0 (0.00%)	0.0603	Mutant group
FBXL20	1 (3.23%)	0 (0.00%)	0.0603	Mutant group
FBXO34	1 (3.23%)	0 (0.00%)	0.0603	Mutant group
FBXO36	1 (3.23%)	0 (0.00%)	0.0603	Mutant group
FBXW12	1 (3.23%)	0 (0.00%)	0.0603	Mutant group
FMN2	1 (3.23%)	0 (0.00%)	0.0603	Mutant group
FRMD1	1 (3.23%)	0 (0.00%)	0.0603	Mutant group
FSIP2	1 (3.23%)	0 (0.00%)	0.0603	Mutant group
FUCA2	1 (3.23%)	0 (0.00%)	0.0603	Mutant group
FZD7	1 (3.23%)	0 (0.00%)	0.0603	Mutant group
GABRG3	1 (3.23%)	0 (0.00%)	0.0603	Mutant group
GAS2	1 (3.23%)	0 (0.00%)	0.0603	Mutant group
GEMIN6	1 (3.23%)	0 (0.00%)	0.0603	Mutant group
GFAP	1 (3.23%)	0 (0.00%)	0.0603	Mutant group
GFPT2	1 (3.23%)	0 (0.00%)	0.0603	Mutant group
GHITM	1 (3.23%)	0 (0.00%)	0.0603	Mutant group
GIGYF1	1 (3.23%)	0 (0.00%)	0.0603	Mutant group
GJA1	1 (3.23%)	0 (0.00%)	0.0603	Mutant group
GJA8	1 (3.23%)	0 (0.00%)	0.0603	Mutant group
GLIS2	1 (3.23%)	0 (0.00%)	0.0603	Mutant group
GLUD1	1 (3.23%)	0 (0.00%)	0.0603	Mutant group
GNPTAB	1 (3.23%)	0 (0.00%)	0.0603	Mutant group
GOLGA5	1 (3.23%)	0 (0.00%)	0.0603	Mutant group
GPAM	1 (3.23%)	0 (0.00%)	0.0603	Mutant group
GPER1	1 (3.23%)	0 (0.00%)	0.0603	Mutant group
GPR20	1 (3.23%)	0 (0.00%)	0.0603	Mutant group
GPR26	1 (3.23%)	0 (0.00%)	0.0603	Mutant group
GPRC5C	1 (3.23%)	0 (0.00%)	0.0603	Mutant group
GPRIN1	1 (3.23%)	0 (0.00%)	0.0603	Mutant group
GPS2	1 (3.23%)	0 (0.00%)	0.0603	Mutant group
GRK4	1 (3.23%)	0 (0.00%)	0.0603	Mutant group
GRWD1	1 (3.23%)	0 (0.00%)	0.0603	Mutant group
HAS1	1 (3.23%)	0 (0.00%)	0.0603	Mutant group
HAUS4	1 (3.23%)	0 (0.00%)	0.0603	Mutant group
HBP1	1 (3.23%)	0 (0.00%)	0.0603	Mutant group
HDAC10	1 (3.23%)	0 (0.00%)	0.0603	Mutant group
HEBP1	1 (3.23%)	0 (0.00%)	0.0603	Mutant group
HECW2	1 (3.23%)	0 (0.00%)	0.0603	Mutant group
HIGD2A	1 (3.23%)	0 (0.00%)	0.0603	Mutant group
HMCES	1 (3.23%)	0 (0.00%)	0.0603	Mutant group
HRH4	1 (3.23%)	0 (0.00%)	0.0603	Mutant group
HSF5	1 (3.23%)	0 (0.00%)	0.0603	Mutant group
ICMT	1 (3.23%)	0 (0.00%)	0.0603	Mutant group
IFNA5	1 (3.23%)	0 (0.00%)	0.0603	Mutant group
IL6ST	1 (3.23%)	0 (0.00%)	0.0603	Mutant group
INTS13	1 (3.23%)	0 (0.00%)	0.0603	Mutant group
IPO11	1 (3.23%)	0 (0.00%)	0.0603	Mutant group
IRF2BP1	1 (3.23%)	0 (0.00%)	0.0603	Mutant group
ISLR2	1 (3.23%)	0 (0.00%)	0.0603	Mutant group
KBTBD11	1 (3.23%)	0 (0.00%)	0.0603	Mutant group
KCNV2	1 (3.23%)	0 (0.00%)	0.0603	Mutant group
KDM2A	1 (3.23%)	0 (0.00%)	0.0603	Mutant group
KHNYN	1 (3.23%)	0 (0.00%)	0.0603	Mutant group
KIAA1522	1 (3.23%)	0 (0.00%)	0.0603	Mutant group
KLHL17	1 (3.23%)	0 (0.00%)	0.0603	Mutant group
KRT10	1 (3.23%)	0 (0.00%)	0.0603	Mutant group
KRTAP1-5	1 (3.23%)	0 (0.00%)	0.0603	Mutant group
KRTAP10-5	1 (3.23%)	0 (0.00%)	0.0603	Mutant group
KRTAP21-2	1 (3.23%)	0 (0.00%)	0.0603	Mutant group
L3MBTL2	1 (3.23%)	0 (0.00%)	0.0603	Mutant group
LAIR2	1 (3.23%)	0 (0.00%)	0.0603	Mutant group
LCE1A	1 (3.23%)	0 (0.00%)	0.0603	Mutant group
LCLAT1	1 (3.23%)	0 (0.00%)	0.0603	Mutant group
LDB1	1 (3.23%)	0 (0.00%)	0.0603	Mutant group
LIM2	1 (3.23%)	0 (0.00%)	0.0603	Mutant group
LMBRD2	1 (3.23%)	0 (0.00%)	0.0603	Mutant group
LPCAT3	1 (3.23%)	0 (0.00%)	0.0603	Mutant group
LRRC8D	1 (3.23%)	0 (0.00%)	0.0603	Mutant group
LTBP3	1 (3.23%)	0 (0.00%)	0.0603	Mutant group
MAF	1 (3.23%)	0 (0.00%)	0.0603	Mutant group
MAGEA3	1 (3.23%)	0 (0.00%)	0.0603	Mutant group
MAN2A1	1 (3.23%)	0 (0.00%)	0.0603	Mutant group
MAN2C1	1 (3.23%)	0 (0.00%)	0.0603	Mutant group
MAPK9	1 (3.23%)	0 (0.00%)	0.0603	Mutant group
MAPKAPK5	1 (3.23%)	0 (0.00%)	0.0603	Mutant group
MARK1	1 (3.23%)	0 (0.00%)	0.0603	Mutant group
MARVELD3	1 (3.23%)	0 (0.00%)	0.0603	Mutant group
MASTL	1 (3.23%)	0 (0.00%)	0.0603	Mutant group
MCM9	1 (3.23%)	0 (0.00%)	0.0603	Mutant group
MED24	1 (3.23%)	0 (0.00%)	0.0603	Mutant group
MIER3	1 (3.23%)	0 (0.00%)	0.0603	Mutant group
MIGA1	1 (3.23%)	0 (0.00%)	0.0603	Mutant group
MLH1	1 (3.23%)	0 (0.00%)	0.0603	Mutant group
MRGPRD	1 (3.23%)	0 (0.00%)	0.0603	Mutant group
MRM1	1 (3.23%)	0 (0.00%)	0.0603	Mutant group
MS4A4A	1 (3.23%)	0 (0.00%)	0.0603	Mutant group
MTERF3	1 (3.23%)	0 (0.00%)	0.0603	Mutant group
MTFR1	1 (3.23%)	0 (0.00%)	0.0603	Mutant group
MTMR7	1 (3.23%)	0 (0.00%)	0.0603	Mutant group
MTREX	1 (3.23%)	0 (0.00%)	0.0603	Mutant group
MUC1	1 (3.23%)	0 (0.00%)	0.0603	Mutant group
MYO5C	1 (3.23%)	0 (0.00%)	0.0603	Mutant group
NAPSA	1 (3.23%)	0 (0.00%)	0.0603	Mutant group
NCAPD2	1 (3.23%)	0 (0.00%)	0.0603	Mutant group
NKAP	1 (3.23%)	0 (0.00%)	0.0603	Mutant group
NOP14	1 (3.23%)	0 (0.00%)	0.0603	Mutant group
NTN3	1 (3.23%)	0 (0.00%)	0.0603	Mutant group
OAF	1 (3.23%)	0 (0.00%)	0.0603	Mutant group
OGFRL1	1 (3.23%)	0 (0.00%)	0.0603	Mutant group
OR10A5	1 (3.23%)	0 (0.00%)	0.0603	Mutant group
OR11H4	1 (3.23%)	0 (0.00%)	0.0603	Mutant group
OR13C2	1 (3.23%)	0 (0.00%)	0.0603	Mutant group
OR1S1	1 (3.23%)	0 (0.00%)	0.0603	Mutant group
OR2AG2	1 (3.23%)	0 (0.00%)	0.0603	Mutant group
OR2D2	1 (3.23%)	0 (0.00%)	0.0603	Mutant group
OR51B4	1 (3.23%)	0 (0.00%)	0.0603	Mutant group
OR5B21	1 (3.23%)	0 (0.00%)	0.0603	Mutant group
OTUB1	1 (3.23%)	0 (0.00%)	0.0603	Mutant group
PACRGL	1 (3.23%)	0 (0.00%)	0.0603	Mutant group
PCDHA12	1 (3.23%)	0 (0.00%)	0.0603	Mutant group
PCSK7	1 (3.23%)	0 (0.00%)	0.0603	Mutant group
PDCD2L	1 (3.23%)	0 (0.00%)	0.0603	Mutant group
PDCD7	1 (3.23%)	0 (0.00%)	0.0603	Mutant group
PEAK1	1 (3.23%)	0 (0.00%)	0.0603	Mutant group
PEX3	1 (3.23%)	0 (0.00%)	0.0603	Mutant group
PFN4	1 (3.23%)	0 (0.00%)	0.0603	Mutant group
PGLYRP3	1 (3.23%)	0 (0.00%)	0.0603	Mutant group
PHACTR3	1 (3.23%)	0 (0.00%)	0.0603	Mutant group
PIGB	1 (3.23%)	0 (0.00%)	0.0603	Mutant group
PLEKHH3	1 (3.23%)	0 (0.00%)	0.0603	Mutant group
PLPPR4	1 (3.23%)	0 (0.00%)	0.0603	Mutant group
PNP	1 (3.23%)	0 (0.00%)	0.0603	Mutant group
POFUT2	1 (3.23%)	0 (0.00%)	0.0603	Mutant group
POLR3GL	1 (3.23%)	0 (0.00%)	0.0603	Mutant group
POSTN	1 (3.23%)	0 (0.00%)	0.0603	Mutant group
PPP2R2C	1 (3.23%)	0 (0.00%)	0.0603	Mutant group
PRKAA1	1 (3.23%)	0 (0.00%)	0.0603	Mutant group
PRR19	1 (3.23%)	0 (0.00%)	0.0603	Mutant group
PRR35	1 (3.23%)	0 (0.00%)	0.0603	Mutant group
PRSS50	1 (3.23%)	0 (0.00%)	0.0603	Mutant group
PSD2	1 (3.23%)	0 (0.00%)	0.0603	Mutant group
PTGDR2	1 (3.23%)	0 (0.00%)	0.0603	Mutant group
RAB26	1 (3.23%)	0 (0.00%)	0.0603	Mutant group
RAB29	1 (3.23%)	0 (0.00%)	0.0603	Mutant group
RBM23	1 (3.23%)	0 (0.00%)	0.0603	Mutant group
RCE1	1 (3.23%)	0 (0.00%)	0.0603	Mutant group
RNF10	1 (3.23%)	0 (0.00%)	0.0603	Mutant group
RNF125	1 (3.23%)	0 (0.00%)	0.0603	Mutant group
RNF14	1 (3.23%)	0 (0.00%)	0.0603	Mutant group
RNF220	1 (3.23%)	0 (0.00%)	0.0603	Mutant group
RSAD2	1 (3.23%)	0 (0.00%)	0.0603	Mutant group
RUSF1	1 (3.23%)	0 (0.00%)	0.0603	Mutant group
SACM1L	1 (3.23%)	0 (0.00%)	0.0603	Mutant group
SAP130	1 (3.23%)	0 (0.00%)	0.0603	Mutant group
SCGN	1 (3.23%)	0 (0.00%)	0.0603	Mutant group
SEMA3A	1 (3.23%)	0 (0.00%)	0.0603	Mutant group
SEMA6C	1 (3.23%)	0 (0.00%)	0.0603	Mutant group
SFMBT2	1 (3.23%)	0 (0.00%)	0.0603	Mutant group
SFR1	1 (3.23%)	0 (0.00%)	0.0603	Mutant group
SFRP2	1 (3.23%)	0 (0.00%)	0.0603	Mutant group
SH3BP1	1 (3.23%)	0 (0.00%)	0.0603	Mutant group
SH3KBP1	1 (3.23%)	0 (0.00%)	0.0603	Mutant group
SLC13A4	1 (3.23%)	0 (0.00%)	0.0603	Mutant group
SLC23A3	1 (3.23%)	0 (0.00%)	0.0603	Mutant group
SLC25A1	1 (3.23%)	0 (0.00%)	0.0603	Mutant group
SLC25A39	1 (3.23%)	0 (0.00%)	0.0603	Mutant group
SLC4A3	1 (3.23%)	0 (0.00%)	0.0603	Mutant group
SLC4A8	1 (3.23%)	0 (0.00%)	0.0603	Mutant group
SLC8A3	1 (3.23%)	0 (0.00%)	0.0603	Mutant group
SMAD9	1 (3.23%)	0 (0.00%)	0.0603	Mutant group
SMCO4	1 (3.23%)	0 (0.00%)	0.0603	Mutant group
SNCB	1 (3.23%)	0 (0.00%)	0.0603	Mutant group
SNURF	1 (3.23%)	0 (0.00%)	0.0603	Mutant group
SNX17	1 (3.23%)	0 (0.00%)	0.0603	Mutant group
SPG7	1 (3.23%)	0 (0.00%)	0.0603	Mutant group
SPOUT1	1 (3.23%)	0 (0.00%)	0.0603	Mutant group
SPPL2C	1 (3.23%)	0 (0.00%)	0.0603	Mutant group
SPTBN2	1 (3.23%)	0 (0.00%)	0.0603	Mutant group
SRSF4	1 (3.23%)	0 (0.00%)	0.0603	Mutant group
SSMEM1	1 (3.23%)	0 (0.00%)	0.0603	Mutant group
STK36	1 (3.23%)	0 (0.00%)	0.0603	Mutant group
STOML1	1 (3.23%)	0 (0.00%)	0.0603	Mutant group
SUSD2	1 (3.23%)	0 (0.00%)	0.0603	Mutant group
SUV39H1	1 (3.23%)	0 (0.00%)	0.0603	Mutant group
SYNPO	1 (3.23%)	0 (0.00%)	0.0603	Mutant group
TBATA	1 (3.23%)	0 (0.00%)	0.0603	Mutant group
TBL1Y	1 (3.23%)	0 (0.00%)	0.0603	Mutant group
TBX10	1 (3.23%)	0 (0.00%)	0.0603	Mutant group
TCHHL1	1 (3.23%)	0 (0.00%)	0.0603	Mutant group
TCP11L2	1 (3.23%)	0 (0.00%)	0.0603	Mutant group
TESMIN	1 (3.23%)	0 (0.00%)	0.0603	Mutant group
TEX101	1 (3.23%)	0 (0.00%)	0.0603	Mutant group
TFE3	1 (3.23%)	0 (0.00%)	0.0603	Mutant group
THEMIS	1 (3.23%)	0 (0.00%)	0.0603	Mutant group
TIGD2	1 (3.23%)	0 (0.00%)	0.0603	Mutant group
TLX2	1 (3.23%)	0 (0.00%)	0.0603	Mutant group
TMEM14C	1 (3.23%)	0 (0.00%)	0.0603	Mutant group
TMEM177	1 (3.23%)	0 (0.00%)	0.0603	Mutant group
TNF	1 (3.23%)	0 (0.00%)	0.0603	Mutant group
TNRC6B	1 (3.23%)	0 (0.00%)	0.0603	Mutant group
TRADD	1 (3.23%)	0 (0.00%)	0.0603	Mutant group
TRBV6-6	1 (3.23%)	0 (0.00%)	0.0603	Mutant group
TRDN	1 (3.23%)	0 (0.00%)	0.0603	Mutant group
TREX1	1 (3.23%)	0 (0.00%)	0.0603	Mutant group
TRIM28	1 (3.23%)	0 (0.00%)	0.0603	Mutant group
TRIM39	1 (3.23%)	0 (0.00%)	0.0603	Mutant group
TRIM52	1 (3.23%)	0 (0.00%)	0.0603	Mutant group
TRIM63	1 (3.23%)	0 (0.00%)	0.0603	Mutant group
TRUB2	1 (3.23%)	0 (0.00%)	0.0603	Mutant group
TSPAN15	1 (3.23%)	0 (0.00%)	0.0603	Mutant group
TSR3	1 (3.23%)	0 (0.00%)	0.0603	Mutant group
TTC26	1 (3.23%)	0 (0.00%)	0.0603	Mutant group
TUBGCP2	1 (3.23%)	0 (0.00%)	0.0603	Mutant group
TXNDC16	1 (3.23%)	0 (0.00%)	0.0603	Mutant group
TXNL4A	1 (3.23%)	0 (0.00%)	0.0603	Mutant group
TYMP	1 (3.23%)	0 (0.00%)	0.0603	Mutant group
UCN	1 (3.23%)	0 (0.00%)	0.0603	Mutant group
UMPS	1 (3.23%)	0 (0.00%)	0.0603	Mutant group
URB2	1 (3.23%)	0 (0.00%)	0.0603	Mutant group
USP40	1 (3.23%)	0 (0.00%)	0.0603	Mutant group
VWA3B	1 (3.23%)	0 (0.00%)	0.0603	Mutant group
XPNPEP1	1 (3.23%)	0 (0.00%)	0.0603	Mutant group
ZC3H11A	1 (3.23%)	0 (0.00%)	0.0603	Mutant group
ZFP41	1 (3.23%)	0 (0.00%)	0.0603	Mutant group
ZFYVE19	1 (3.23%)	0 (0.00%)	0.0603	Mutant group
ZGLP1	1 (3.23%)	0 (0.00%)	0.0603	Mutant group
ZMAT3	1 (3.23%)	0 (0.00%)	0.0603	Mutant group
ZMPSTE24	1 (3.23%)	0 (0.00%)	0.0603	Mutant group
ZNF20	1 (3.23%)	0 (0.00%)	0.0603	Mutant group
ZNF226	1 (3.23%)	0 (0.00%)	0.0603	Mutant group
ZNF30	1 (3.23%)	0 (0.00%)	0.0603	Mutant group
ZNF540	1 (3.23%)	0 (0.00%)	0.0603	Mutant group
ZNF559	1 (3.23%)	0 (0.00%)	0.0603	Mutant group
ZNF675	1 (3.23%)	0 (0.00%)	0.0603	Mutant group
ZNF782	1 (3.23%)	0 (0.00%)	0.0603	Mutant group
POTEF	4 (4.30%)	2 (0.88%)	0.0608	Mutant group
ZNF492	4 (4.30%)	2 (0.88%)	0.0608	Mutant group
RTL9	2 (6.45%)	5 (1.04%)	0.0612	Mutant group
SCN9A	5 (8.06%)	6 (2.63%)	0.0612	Mutant group
ADGRF5	4 (4.30%)	6 (1.24%)	0.0615	Mutant group
PLEKHG4B	4 (4.30%)	6 (1.24%)	0.0615	Mutant group
RPL5	0 (0.00%)	8 (3.51%)	0.0625	Non-mutant group
IDH1	31 (33.33%)	205 (42.44%)	0.0632	Non-mutant group
DSP	4 (6.45%)	10 (2.07%)	0.0634	Mutant group
AQP10	2 (3.23%)	2 (0.41%)	0.0657	Mutant group
CDH5	2 (3.23%)	2 (0.41%)	0.0657	Mutant group
CDYL2	2 (3.23%)	2 (0.41%)	0.0657	Mutant group
CTSG	2 (3.23%)	2 (0.41%)	0.0657	Mutant group
GALNT14	2 (3.23%)	2 (0.41%)	0.0657	Mutant group
GLUD2	2 (3.23%)	2 (0.41%)	0.0657	Mutant group
HNF1B	2 (3.23%)	2 (0.41%)	0.0657	Mutant group
KCNA10	2 (3.23%)	2 (0.41%)	0.0657	Mutant group
KCNG1	2 (3.23%)	2 (0.41%)	0.0657	Mutant group
KCNH6	2 (3.23%)	2 (0.41%)	0.0657	Mutant group
KIF4A	2 (3.23%)	2 (0.41%)	0.0657	Mutant group
MAP2K3	2 (3.23%)	2 (0.41%)	0.0657	Mutant group
MARCHF6	2 (3.23%)	2 (0.41%)	0.0657	Mutant group
MC4R	2 (3.23%)	2 (0.41%)	0.0657	Mutant group
MPP7	2 (3.23%)	2 (0.41%)	0.0657	Mutant group
MYH14	2 (3.23%)	2 (0.41%)	0.0657	Mutant group
MYO5B	2 (3.23%)	2 (0.41%)	0.0657	Mutant group
NPHS1	2 (3.23%)	2 (0.41%)	0.0657	Mutant group
OR10A3	2 (3.23%)	2 (0.41%)	0.0657	Mutant group
OR10H5	2 (3.23%)	2 (0.41%)	0.0657	Mutant group
PDE3A	2 (3.23%)	2 (0.41%)	0.0657	Mutant group
PDHA2	2 (3.23%)	2 (0.41%)	0.0657	Mutant group
PGM5	2 (3.23%)	2 (0.41%)	0.0657	Mutant group
PLXNA2	2 (3.23%)	2 (0.41%)	0.0657	Mutant group
ROBO1	2 (3.23%)	2 (0.41%)	0.0657	Mutant group
SEC23B	2 (3.23%)	2 (0.41%)	0.0657	Mutant group
SHANK1	2 (3.23%)	2 (0.41%)	0.0657	Mutant group
SIPA1L1	2 (3.23%)	2 (0.41%)	0.0657	Mutant group
SLC28A1	2 (3.23%)	2 (0.41%)	0.0657	Mutant group
SYN3	2 (3.23%)	2 (0.41%)	0.0657	Mutant group
TBX5	2 (3.23%)	2 (0.41%)	0.0657	Mutant group
TMTC1	2 (3.23%)	2 (0.41%)	0.0657	Mutant group
UBR5	2 (3.23%)	2 (0.41%)	0.0657	Mutant group
ZFYVE26	2 (3.23%)	2 (0.41%)	0.0657	Mutant group
COL3A1	3 (4.84%)	2 (0.88%)	0.0674	Mutant group
GCC2	3 (4.84%)	2 (0.88%)	0.0674	Mutant group
MYO9B	3 (4.84%)	2 (0.88%)	0.0674	Mutant group
PSG8	3 (4.84%)	2 (0.88%)	0.0674	Mutant group
SMC1A	3 (4.84%)	2 (0.88%)	0.0674	Mutant group
GSPT2	2 (6.45%)	2 (0.88%)	0.0715	Mutant group
GRM3	3 (4.84%)	6 (1.24%)	0.0715	Mutant group
TPTE2	3 (4.84%)	6 (1.24%)	0.0715	Mutant group
CD96	3 (3.23%)	1 (0.44%)	0.0749	Mutant group
CNGB1	3 (3.23%)	1 (0.44%)	0.0749	Mutant group
CTNNA2	3 (3.23%)	1 (0.44%)	0.0749	Mutant group
LRBA	3 (3.23%)	1 (0.44%)	0.0749	Mutant group
NFATC2	3 (3.23%)	1 (0.44%)	0.0749	Mutant group
RFX7	3 (3.23%)	1 (0.44%)	0.0749	Mutant group
SNAP91	3 (3.23%)	1 (0.44%)	0.0749	Mutant group
USP20	3 (3.23%)	1 (0.44%)	0.0749	Mutant group
PDGFRA	5 (5.38%)	10 (2.07%)	0.0776	Mutant group
COL1A2	4 (6.45%)	11 (2.28%)	0.0792	Mutant group
DCAF12L2	4 (4.30%)	7 (1.45%)	0.0849	Mutant group
ADGRV1	6 (6.45%)	14 (2.90%)	0.0864	Mutant group
ALMS1	3 (3.23%)	4 (0.83%)	0.0874	Mutant group
ANKRD30A	3 (3.23%)	4 (0.83%)	0.0874	Mutant group
ASPM	3 (3.23%)	4 (0.83%)	0.0874	Mutant group
CD209	3 (3.23%)	4 (0.83%)	0.0874	Mutant group
CDH23	3 (3.23%)	4 (0.83%)	0.0874	Mutant group
DGKD	3 (3.23%)	4 (0.83%)	0.0874	Mutant group
DYSF	3 (3.23%)	4 (0.83%)	0.0874	Mutant group
FLNC	3 (3.23%)	4 (0.83%)	0.0874	Mutant group
MAGEC2	3 (3.23%)	4 (0.83%)	0.0874	Mutant group
OTOF	3 (3.23%)	4 (0.83%)	0.0874	Mutant group
PLA2G4A	3 (3.23%)	4 (0.83%)	0.0874	Mutant group
TAF1	3 (3.23%)	4 (0.83%)	0.0874	Mutant group
SLC5A7	0 (0.00%)	7 (3.07%)	0.0888	Non-mutant group
UBC	0 (0.00%)	7 (3.07%)	0.0888	Non-mutant group
ANKRD11	2 (6.45%)	3 (1.18%)	0.0925	Mutant group
MUC17	8 (8.60%)	22 (4.55%)	0.0928	Mutant group
CELSR3	3 (4.84%)	7 (1.45%)	0.094	Mutant group
KCNB2	3 (4.84%)	7 (1.45%)	0.094	Mutant group
PCDH11X	3 (4.84%)	7 (1.45%)	0.094	Mutant group
PRDM9	0 (0.00%)	13 (2.69%)	0.0987	Non-mutant group
ACSM2A	2 (3.23%)	1 (0.39%)	0.0989	Mutant group
ARHGAP35	2 (3.23%)	1 (0.39%)	0.0989	Mutant group
B3GNT3	2 (3.23%)	1 (0.39%)	0.0989	Mutant group
COLEC12	2 (3.23%)	1 (0.39%)	0.0989	Mutant group
DDX17	2 (3.23%)	1 (0.39%)	0.0989	Mutant group
ECEL1	2 (3.23%)	1 (0.39%)	0.0989	Mutant group
EHMT2	2 (3.23%)	1 (0.39%)	0.0989	Mutant group
EML5	2 (3.23%)	1 (0.39%)	0.0989	Mutant group
FCRL2	2 (3.23%)	1 (0.39%)	0.0989	Mutant group
INSRR	2 (3.23%)	1 (0.39%)	0.0989	Mutant group
LRRC8E	2 (3.23%)	1 (0.39%)	0.0989	Mutant group
MYO3B	2 (3.23%)	1 (0.39%)	0.0989	Mutant group
NEK4	2 (3.23%)	1 (0.39%)	0.0989	Mutant group
OR4D6	2 (3.23%)	1 (0.39%)	0.0989	Mutant group
PCDHA4	2 (3.23%)	1 (0.39%)	0.0989	Mutant group
POU2AF1	2 (3.23%)	1 (0.39%)	0.0989	Mutant group
RBM46	2 (3.23%)	1 (0.39%)	0.0989	Mutant group
SAGE1	2 (3.23%)	1 (0.39%)	0.0989	Mutant group
SEPTIN7	2 (3.23%)	1 (0.39%)	0.0989	Mutant group
ZBED1	2 (3.23%)	1 (0.39%)	0.0989	Mutant group
ALB	2 (3.23%)	3 (0.62%)	0.102	Mutant group
CEACAM5	2 (3.23%)	3 (0.62%)	0.102	Mutant group
CP	2 (3.23%)	3 (0.62%)	0.102	Mutant group
CYP4F12	2 (3.23%)	3 (0.62%)	0.102	Mutant group
DOCK11	2 (3.23%)	3 (0.62%)	0.102	Mutant group
ENPP2	2 (3.23%)	3 (0.62%)	0.102	Mutant group
EPHB6	2 (3.23%)	3 (0.62%)	0.102	Mutant group
KMT2A	2 (3.23%)	3 (0.62%)	0.102	Mutant group
MAGEA6	2 (3.23%)	3 (0.62%)	0.102	Mutant group
MAP1S	2 (3.23%)	3 (0.62%)	0.102	Mutant group
MYO18A	2 (3.23%)	3 (0.62%)	0.102	Mutant group
NELL1	2 (3.23%)	3 (0.62%)	0.102	Mutant group
NHS	2 (3.23%)	3 (0.62%)	0.102	Mutant group
NRXN1	2 (3.23%)	3 (0.62%)	0.102	Mutant group
OTOA	2 (3.23%)	3 (0.62%)	0.102	Mutant group
PCDHB13	2 (3.23%)	3 (0.62%)	0.102	Mutant group
PSD4	2 (3.23%)	3 (0.62%)	0.102	Mutant group
PTPRZ1	2 (3.23%)	3 (0.62%)	0.102	Mutant group
REXO1	2 (3.23%)	3 (0.62%)	0.102	Mutant group
WSCD2	2 (3.23%)	3 (0.62%)	0.102	Mutant group
ZMIZ1	2 (3.23%)	3 (0.62%)	0.102	Mutant group
LAMA5	4 (4.30%)	3 (1.32%)	0.111	Mutant group
CHD9	4 (4.30%)	8 (1.66%)	0.112	Mutant group
KIF2B	4 (4.30%)	8 (1.66%)	0.112	Mutant group
LRP1B	4 (4.30%)	8 (1.66%)	0.112	Mutant group
AADAC	1 (1.61%)	0 (0.00%)	0.114	Mutant group
AANAT	1 (1.61%)	0 (0.00%)	0.114	Mutant group
AATK	1 (1.61%)	0 (0.00%)	0.114	Mutant group
ABCC6	1 (1.61%)	0 (0.00%)	0.114	Mutant group
ABRAXAS1	1 (1.61%)	0 (0.00%)	0.114	Mutant group
ACCSL	1 (1.61%)	0 (0.00%)	0.114	Mutant group
ACMSD	1 (1.61%)	0 (0.00%)	0.114	Mutant group
ACOT12	1 (1.61%)	0 (0.00%)	0.114	Mutant group
ACOX2	1 (1.61%)	0 (0.00%)	0.114	Mutant group
ACSM3	1 (1.61%)	0 (0.00%)	0.114	Mutant group
ACSM6	1 (1.61%)	0 (0.00%)	0.114	Mutant group
ADAD1	1 (1.61%)	0 (0.00%)	0.114	Mutant group
ADAMTS6	1 (1.61%)	0 (0.00%)	0.114	Mutant group
ADAT3	1 (1.61%)	0 (0.00%)	0.114	Mutant group
ADCYAP1R1	1 (1.61%)	0 (0.00%)	0.114	Mutant group
ADPRHL1	1 (1.61%)	0 (0.00%)	0.114	Mutant group
AEBP1	1 (1.61%)	0 (0.00%)	0.114	Mutant group
AGTR1	1 (1.61%)	0 (0.00%)	0.114	Mutant group
AHDC1	1 (1.61%)	0 (0.00%)	0.114	Mutant group
AIDA	1 (1.61%)	0 (0.00%)	0.114	Mutant group
AK5	1 (1.61%)	0 (0.00%)	0.114	Mutant group
AKAP11	1 (1.61%)	0 (0.00%)	0.114	Mutant group
AKAP14	1 (1.61%)	0 (0.00%)	0.114	Mutant group
AKR1A1	1 (1.61%)	0 (0.00%)	0.114	Mutant group
AKR1E2	1 (1.61%)	0 (0.00%)	0.114	Mutant group
AKTIP	1 (1.61%)	0 (0.00%)	0.114	Mutant group
ALG1	1 (1.61%)	0 (0.00%)	0.114	Mutant group
ALS2	1 (1.61%)	0 (0.00%)	0.114	Mutant group
AMHR2	1 (1.61%)	0 (0.00%)	0.114	Mutant group
AMN1	1 (1.61%)	0 (0.00%)	0.114	Mutant group
AMOT	1 (1.61%)	0 (0.00%)	0.114	Mutant group
AMZ1	1 (1.61%)	0 (0.00%)	0.114	Mutant group
ANKRD16	1 (1.61%)	0 (0.00%)	0.114	Mutant group
AP1B1	1 (1.61%)	0 (0.00%)	0.114	Mutant group
AP2A2	1 (1.61%)	0 (0.00%)	0.114	Mutant group
AP4M1	1 (1.61%)	0 (0.00%)	0.114	Mutant group
APOA5	1 (1.61%)	0 (0.00%)	0.114	Mutant group
APOBEC3B	1 (1.61%)	0 (0.00%)	0.114	Mutant group
APP	1 (1.61%)	0 (0.00%)	0.114	Mutant group
ARHGAP36	1 (1.61%)	0 (0.00%)	0.114	Mutant group
ARHGDIA	1 (1.61%)	0 (0.00%)	0.114	Mutant group
ARID3A	1 (1.61%)	0 (0.00%)	0.114	Mutant group
ARL1	1 (1.61%)	0 (0.00%)	0.114	Mutant group
ARL8B	1 (1.61%)	0 (0.00%)	0.114	Mutant group
ARMC1	1 (1.61%)	0 (0.00%)	0.114	Mutant group
ARMC6	1 (1.61%)	0 (0.00%)	0.114	Mutant group
ARPP21	1 (1.61%)	0 (0.00%)	0.114	Mutant group
ARX	1 (1.61%)	0 (0.00%)	0.114	Mutant group
ASAP2	1 (1.61%)	0 (0.00%)	0.114	Mutant group
ASB12	1 (1.61%)	0 (0.00%)	0.114	Mutant group
ASB5	1 (1.61%)	0 (0.00%)	0.114	Mutant group
ATG4B	1 (1.61%)	0 (0.00%)	0.114	Mutant group
ATP1A1	1 (1.61%)	0 (0.00%)	0.114	Mutant group
ATP5F1B	1 (1.61%)	0 (0.00%)	0.114	Mutant group
ATP6AP1	1 (1.61%)	0 (0.00%)	0.114	Mutant group
ATP6V0D2	1 (1.61%)	0 (0.00%)	0.114	Mutant group
AUP1	1 (1.61%)	0 (0.00%)	0.114	Mutant group
AXIN2	1 (1.61%)	0 (0.00%)	0.114	Mutant group
BCAS1	1 (1.61%)	0 (0.00%)	0.114	Mutant group
BCL2A1	1 (1.61%)	0 (0.00%)	0.114	Mutant group
BCL2L2	1 (1.61%)	0 (0.00%)	0.114	Mutant group
BEND6	1 (1.61%)	0 (0.00%)	0.114	Mutant group
BIN2	1 (1.61%)	0 (0.00%)	0.114	Mutant group
BIVM	1 (1.61%)	0 (0.00%)	0.114	Mutant group
BLZF1	1 (1.61%)	0 (0.00%)	0.114	Mutant group
BMPER	1 (1.61%)	0 (0.00%)	0.114	Mutant group
BOK	1 (1.61%)	0 (0.00%)	0.114	Mutant group
BORCS6	1 (1.61%)	0 (0.00%)	0.114	Mutant group
BRF2	1 (1.61%)	0 (0.00%)	0.114	Mutant group
BRIP1	1 (1.61%)	0 (0.00%)	0.114	Mutant group
BRIX1	1 (1.61%)	0 (0.00%)	0.114	Mutant group
BTBD16	1 (1.61%)	0 (0.00%)	0.114	Mutant group
BTN2A2	1 (1.61%)	0 (0.00%)	0.114	Mutant group
BTN3A3	1 (1.61%)	0 (0.00%)	0.114	Mutant group
C12ORF60	1 (1.61%)	0 (0.00%)	0.114	Mutant group
C15ORF32	1 (1.61%)	0 (0.00%)	0.114	Mutant group
C19ORF54	1 (1.61%)	0 (0.00%)	0.114	Mutant group
C1ORF100	1 (1.61%)	0 (0.00%)	0.114	Mutant group
C1ORF112	1 (1.61%)	0 (0.00%)	0.114	Mutant group
C20ORF85	1 (1.61%)	0 (0.00%)	0.114	Mutant group
C3ORF38	1 (1.61%)	0 (0.00%)	0.114	Mutant group
C5	1 (1.61%)	0 (0.00%)	0.114	Mutant group
C5ORF46	1 (1.61%)	0 (0.00%)	0.114	Mutant group
C9ORF163	1 (1.61%)	0 (0.00%)	0.114	Mutant group
CAMK4	1 (1.61%)	0 (0.00%)	0.114	Mutant group
CARNMT1	1 (1.61%)	0 (0.00%)	0.114	Mutant group
CASP10	1 (1.61%)	0 (0.00%)	0.114	Mutant group
CATSPERZ	1 (1.61%)	0 (0.00%)	0.114	Mutant group
CBX2	1 (1.61%)	0 (0.00%)	0.114	Mutant group
CCDC102A	1 (1.61%)	0 (0.00%)	0.114	Mutant group
CCDC102B	1 (1.61%)	0 (0.00%)	0.114	Mutant group
CCDC141	1 (1.61%)	0 (0.00%)	0.114	Mutant group
CCDC17	1 (1.61%)	0 (0.00%)	0.114	Mutant group
CCDC178	1 (1.61%)	0 (0.00%)	0.114	Mutant group
CCDC180	1 (1.61%)	0 (0.00%)	0.114	Mutant group
CCDC190	1 (1.61%)	0 (0.00%)	0.114	Mutant group
CCDC27	1 (1.61%)	0 (0.00%)	0.114	Mutant group
CCDC68	1 (1.61%)	0 (0.00%)	0.114	Mutant group
CCDC80	1 (1.61%)	0 (0.00%)	0.114	Mutant group
CCDC87	1 (1.61%)	0 (0.00%)	0.114	Mutant group
CCL15	1 (1.61%)	0 (0.00%)	0.114	Mutant group
CCR4	1 (1.61%)	0 (0.00%)	0.114	Mutant group
CCT2	1 (1.61%)	0 (0.00%)	0.114	Mutant group
CD207	1 (1.61%)	0 (0.00%)	0.114	Mutant group
CD38	1 (1.61%)	0 (0.00%)	0.114	Mutant group
CD84	1 (1.61%)	0 (0.00%)	0.114	Mutant group
CD8A	1 (1.61%)	0 (0.00%)	0.114	Mutant group
CDC42EP2	1 (1.61%)	0 (0.00%)	0.114	Mutant group
CDC45	1 (1.61%)	0 (0.00%)	0.114	Mutant group
CDKN1A	1 (1.61%)	0 (0.00%)	0.114	Mutant group
CDX2	1 (1.61%)	0 (0.00%)	0.114	Mutant group
CENPM	1 (1.61%)	0 (0.00%)	0.114	Mutant group
CERS6	1 (1.61%)	0 (0.00%)	0.114	Mutant group
CFAP119	1 (1.61%)	0 (0.00%)	0.114	Mutant group
CFC1	1 (1.61%)	0 (0.00%)	0.114	Mutant group
CHAMP1	1 (1.61%)	0 (0.00%)	0.114	Mutant group
CHCHD2	1 (1.61%)	0 (0.00%)	0.114	Mutant group
CHCHD3	1 (1.61%)	0 (0.00%)	0.114	Mutant group
CHD1L	1 (1.61%)	0 (0.00%)	0.114	Mutant group
CHRNG	1 (1.61%)	0 (0.00%)	0.114	Mutant group
CHST4	1 (1.61%)	0 (0.00%)	0.114	Mutant group
CKB	1 (1.61%)	0 (0.00%)	0.114	Mutant group
CKM	1 (1.61%)	0 (0.00%)	0.114	Mutant group
CLCN4	1 (1.61%)	0 (0.00%)	0.114	Mutant group
CLCN5	1 (1.61%)	0 (0.00%)	0.114	Mutant group
CLEC16A	1 (1.61%)	0 (0.00%)	0.114	Mutant group
CLEC4E	1 (1.61%)	0 (0.00%)	0.114	Mutant group
CLIC5	1 (1.61%)	0 (0.00%)	0.114	Mutant group
CLUL1	1 (1.61%)	0 (0.00%)	0.114	Mutant group
CMKLR2	1 (1.61%)	0 (0.00%)	0.114	Mutant group
CNKSR1	1 (1.61%)	0 (0.00%)	0.114	Mutant group
COA7	1 (1.61%)	0 (0.00%)	0.114	Mutant group
COL15A1	1 (1.61%)	0 (0.00%)	0.114	Mutant group
COL8A2	1 (1.61%)	0 (0.00%)	0.114	Mutant group
COMMD4	1 (1.61%)	0 (0.00%)	0.114	Mutant group
COPB1	1 (1.61%)	0 (0.00%)	0.114	Mutant group
COPS7B	1 (1.61%)	0 (0.00%)	0.114	Mutant group
COQ9	1 (1.61%)	0 (0.00%)	0.114	Mutant group
CREB1	1 (1.61%)	0 (0.00%)	0.114	Mutant group
CREB3L1	1 (1.61%)	0 (0.00%)	0.114	Mutant group
CRLF1	1 (1.61%)	0 (0.00%)	0.114	Mutant group
CRYBA4	1 (1.61%)	0 (0.00%)	0.114	Mutant group
CRYGD	1 (1.61%)	0 (0.00%)	0.114	Mutant group
CRYM	1 (1.61%)	0 (0.00%)	0.114	Mutant group
CSF1R	1 (1.61%)	0 (0.00%)	0.114	Mutant group
CSF3R	1 (1.61%)	0 (0.00%)	0.114	Mutant group
CSK	1 (1.61%)	0 (0.00%)	0.114	Mutant group
CSNK1G1	1 (1.61%)	0 (0.00%)	0.114	Mutant group
CSNK2A3	1 (1.61%)	0 (0.00%)	0.114	Mutant group
CSPG5	1 (1.61%)	0 (0.00%)	0.114	Mutant group
CT45A5	1 (1.61%)	0 (0.00%)	0.114	Mutant group
CTAG2	1 (1.61%)	0 (0.00%)	0.114	Mutant group
CTDNEP1	1 (1.61%)	0 (0.00%)	0.114	Mutant group
CUX1	1 (1.61%)	0 (0.00%)	0.114	Mutant group
CX3CL1	1 (1.61%)	0 (0.00%)	0.114	Mutant group
CXXC5	1 (1.61%)	0 (0.00%)	0.114	Mutant group
CYB5R1	1 (1.61%)	0 (0.00%)	0.114	Mutant group
CYP2E1	1 (1.61%)	0 (0.00%)	0.114	Mutant group
CYP2U1	1 (1.61%)	0 (0.00%)	0.114	Mutant group
DACT1	1 (1.61%)	0 (0.00%)	0.114	Mutant group
DARS1	1 (1.61%)	0 (0.00%)	0.114	Mutant group
DBF4	1 (1.61%)	0 (0.00%)	0.114	Mutant group
DCAF5	1 (1.61%)	0 (0.00%)	0.114	Mutant group
DCK	1 (1.61%)	0 (0.00%)	0.114	Mutant group
DCN	1 (1.61%)	0 (0.00%)	0.114	Mutant group
DCP1A	1 (1.61%)	0 (0.00%)	0.114	Mutant group
DCT	1 (1.61%)	0 (0.00%)	0.114	Mutant group
DDB1	1 (1.61%)	0 (0.00%)	0.114	Mutant group
DDX12P	1 (1.61%)	0 (0.00%)	0.114	Mutant group
DEDD2	1 (1.61%)	0 (0.00%)	0.114	Mutant group
DELE1	1 (1.61%)	0 (0.00%)	0.114	Mutant group
DELEC1	1 (1.61%)	0 (0.00%)	0.114	Mutant group
DENND6A	1 (1.61%)	0 (0.00%)	0.114	Mutant group
DGKK	1 (1.61%)	0 (0.00%)	0.114	Mutant group
DIMT1	1 (1.61%)	0 (0.00%)	0.114	Mutant group
DLK1	1 (1.61%)	0 (0.00%)	0.114	Mutant group
DMAP1	1 (1.61%)	0 (0.00%)	0.114	Mutant group
DMTF1	1 (1.61%)	0 (0.00%)	0.114	Mutant group
DNA2	1 (1.61%)	0 (0.00%)	0.114	Mutant group
DNAJC13	1 (1.61%)	0 (0.00%)	0.114	Mutant group
DNMT3B	1 (1.61%)	0 (0.00%)	0.114	Mutant group
DNMT3L	1 (1.61%)	0 (0.00%)	0.114	Mutant group
DOCK3	1 (1.61%)	0 (0.00%)	0.114	Mutant group
DOCK7	1 (1.61%)	0 (0.00%)	0.114	Mutant group
DOCK9	1 (1.61%)	0 (0.00%)	0.114	Mutant group
DPM1	1 (1.61%)	0 (0.00%)	0.114	Mutant group
DRD3	1 (1.61%)	0 (0.00%)	0.114	Mutant group
DRICH1	1 (1.61%)	0 (0.00%)	0.114	Mutant group
DTD1	1 (1.61%)	0 (0.00%)	0.114	Mutant group
DTX3L	1 (1.61%)	0 (0.00%)	0.114	Mutant group
DYTN	1 (1.61%)	0 (0.00%)	0.114	Mutant group
E2F6	1 (1.61%)	0 (0.00%)	0.114	Mutant group
EBF1	1 (1.61%)	0 (0.00%)	0.114	Mutant group
ECM2	1 (1.61%)	0 (0.00%)	0.114	Mutant group
EGFL6	1 (1.61%)	0 (0.00%)	0.114	Mutant group
EHBP1	1 (1.61%)	0 (0.00%)	0.114	Mutant group
EIF3E	1 (1.61%)	0 (0.00%)	0.114	Mutant group
EIF3M	1 (1.61%)	0 (0.00%)	0.114	Mutant group
ELK1	1 (1.61%)	0 (0.00%)	0.114	Mutant group
ELMO2	1 (1.61%)	0 (0.00%)	0.114	Mutant group
ELOA2	1 (1.61%)	0 (0.00%)	0.114	Mutant group
ELP3	1 (1.61%)	0 (0.00%)	0.114	Mutant group
EML3	1 (1.61%)	0 (0.00%)	0.114	Mutant group
ENO3	1 (1.61%)	0 (0.00%)	0.114	Mutant group
EPB41L4B	1 (1.61%)	0 (0.00%)	0.114	Mutant group
EPB42	1 (1.61%)	0 (0.00%)	0.114	Mutant group
EPC1	1 (1.61%)	0 (0.00%)	0.114	Mutant group
EPS8	1 (1.61%)	0 (0.00%)	0.114	Mutant group
ETNPPL	1 (1.61%)	0 (0.00%)	0.114	Mutant group
EVA1A	1 (1.61%)	0 (0.00%)	0.114	Mutant group
EVI5	1 (1.61%)	0 (0.00%)	0.114	Mutant group
EXD2	1 (1.61%)	0 (0.00%)	0.114	Mutant group
FAAH	1 (1.61%)	0 (0.00%)	0.114	Mutant group
FAAP20	1 (1.61%)	0 (0.00%)	0.114	Mutant group
FAAP24	1 (1.61%)	0 (0.00%)	0.114	Mutant group
FABP1	1 (1.61%)	0 (0.00%)	0.114	Mutant group
FABP6	1 (1.61%)	0 (0.00%)	0.114	Mutant group
FAM118A	1 (1.61%)	0 (0.00%)	0.114	Mutant group
FAM120A	1 (1.61%)	0 (0.00%)	0.114	Mutant group
FAM166C	1 (1.61%)	0 (0.00%)	0.114	Mutant group
FAM170A	1 (1.61%)	0 (0.00%)	0.114	Mutant group
FAM20A	1 (1.61%)	0 (0.00%)	0.114	Mutant group
FAM3A	1 (1.61%)	0 (0.00%)	0.114	Mutant group
FAM83E	1 (1.61%)	0 (0.00%)	0.114	Mutant group
FAXC	1 (1.61%)	0 (0.00%)	0.114	Mutant group
FBXL19	1 (1.61%)	0 (0.00%)	0.114	Mutant group
FBXO10	1 (1.61%)	0 (0.00%)	0.114	Mutant group
FBXO41	1 (1.61%)	0 (0.00%)	0.114	Mutant group
FCER2	1 (1.61%)	0 (0.00%)	0.114	Mutant group
FCN1	1 (1.61%)	0 (0.00%)	0.114	Mutant group
FES	1 (1.61%)	0 (0.00%)	0.114	Mutant group
FEZ1	1 (1.61%)	0 (0.00%)	0.114	Mutant group
FEZ2	1 (1.61%)	0 (0.00%)	0.114	Mutant group
FGF7	1 (1.61%)	0 (0.00%)	0.114	Mutant group
FIGN	1 (1.61%)	0 (0.00%)	0.114	Mutant group
FILIP1L	1 (1.61%)	0 (0.00%)	0.114	Mutant group
FKBPL	1 (1.61%)	0 (0.00%)	0.114	Mutant group
FLRT2	1 (1.61%)	0 (0.00%)	0.114	Mutant group
FOLH1B	1 (1.61%)	0 (0.00%)	0.114	Mutant group
FOLR1	1 (1.61%)	0 (0.00%)	0.114	Mutant group
FOXF2	1 (1.61%)	0 (0.00%)	0.114	Mutant group
FOXK2	1 (1.61%)	0 (0.00%)	0.114	Mutant group
FOXL1	1 (1.61%)	0 (0.00%)	0.114	Mutant group
FOXN3	1 (1.61%)	0 (0.00%)	0.114	Mutant group
FOXS1	1 (1.61%)	0 (0.00%)	0.114	Mutant group
FRZB	1 (1.61%)	0 (0.00%)	0.114	Mutant group
FUT6	1 (1.61%)	0 (0.00%)	0.114	Mutant group
FUT8	1 (1.61%)	0 (0.00%)	0.114	Mutant group
FXN	1 (1.61%)	0 (0.00%)	0.114	Mutant group
FYN	1 (1.61%)	0 (0.00%)	0.114	Mutant group
GAA	1 (1.61%)	0 (0.00%)	0.114	Mutant group
GABRA2	1 (1.61%)	0 (0.00%)	0.114	Mutant group
GABRD	1 (1.61%)	0 (0.00%)	0.114	Mutant group
GABRQ	1 (1.61%)	0 (0.00%)	0.114	Mutant group
GAD1	1 (1.61%)	0 (0.00%)	0.114	Mutant group
GADL1	1 (1.61%)	0 (0.00%)	0.114	Mutant group
GALT	1 (1.61%)	0 (0.00%)	0.114	Mutant group
GAPDH	1 (1.61%)	0 (0.00%)	0.114	Mutant group
GARIN5A	1 (1.61%)	0 (0.00%)	0.114	Mutant group
GAS8-AS1	1 (1.61%)	0 (0.00%)	0.114	Mutant group
GBX1	1 (1.61%)	0 (0.00%)	0.114	Mutant group
GCA	1 (1.61%)	0 (0.00%)	0.114	Mutant group
GCAT	1 (1.61%)	0 (0.00%)	0.114	Mutant group
GCG	1 (1.61%)	0 (0.00%)	0.114	Mutant group
GCNT4	1 (1.61%)	0 (0.00%)	0.114	Mutant group
GDF2	1 (1.61%)	0 (0.00%)	0.114	Mutant group
GDF3	1 (1.61%)	0 (0.00%)	0.114	Mutant group
GDF7	1 (1.61%)	0 (0.00%)	0.114	Mutant group
GEM	1 (1.61%)	0 (0.00%)	0.114	Mutant group
GIMAP2	1 (1.61%)	0 (0.00%)	0.114	Mutant group
GIMAP7	1 (1.61%)	0 (0.00%)	0.114	Mutant group
GJB4	1 (1.61%)	0 (0.00%)	0.114	Mutant group
GJC1	1 (1.61%)	0 (0.00%)	0.114	Mutant group
GLYR1	1 (1.61%)	0 (0.00%)	0.114	Mutant group
GNA11	1 (1.61%)	0 (0.00%)	0.114	Mutant group
GNB1	1 (1.61%)	0 (0.00%)	0.114	Mutant group
GNGT2	1 (1.61%)	0 (0.00%)	0.114	Mutant group
GOLGA2	1 (1.61%)	0 (0.00%)	0.114	Mutant group
GOLGA6A	1 (1.61%)	0 (0.00%)	0.114	Mutant group
GOLGA6B	1 (1.61%)	0 (0.00%)	0.114	Mutant group
GPAT4	1 (1.61%)	0 (0.00%)	0.114	Mutant group
GPC6	1 (1.61%)	0 (0.00%)	0.114	Mutant group
GPR137	1 (1.61%)	0 (0.00%)	0.114	Mutant group
GPR146	1 (1.61%)	0 (0.00%)	0.114	Mutant group
GPR148	1 (1.61%)	0 (0.00%)	0.114	Mutant group
GPR182	1 (1.61%)	0 (0.00%)	0.114	Mutant group
GPR27	1 (1.61%)	0 (0.00%)	0.114	Mutant group
GPR6	1 (1.61%)	0 (0.00%)	0.114	Mutant group
GPR75	1 (1.61%)	0 (0.00%)	0.114	Mutant group
GSDMA	1 (1.61%)	0 (0.00%)	0.114	Mutant group
GSDMC	1 (1.61%)	0 (0.00%)	0.114	Mutant group
GSE1	1 (1.61%)	0 (0.00%)	0.114	Mutant group
GTSE1	1 (1.61%)	0 (0.00%)	0.114	Mutant group
H2AP	1 (1.61%)	0 (0.00%)	0.114	Mutant group
H2BC13	1 (1.61%)	0 (0.00%)	0.114	Mutant group
H3C7	1 (1.61%)	0 (0.00%)	0.114	Mutant group
HABP2	1 (1.61%)	0 (0.00%)	0.114	Mutant group
HAUS7	1 (1.61%)	0 (0.00%)	0.114	Mutant group
HCRTR1	1 (1.61%)	0 (0.00%)	0.114	Mutant group
HECTD2	1 (1.61%)	0 (0.00%)	0.114	Mutant group
HIP1R	1 (1.61%)	0 (0.00%)	0.114	Mutant group
HIVEP2	1 (1.61%)	0 (0.00%)	0.114	Mutant group
HLA-DOA	1 (1.61%)	0 (0.00%)	0.114	Mutant group
HLA-L	1 (1.61%)	0 (0.00%)	0.114	Mutant group
HMG20A	1 (1.61%)	0 (0.00%)	0.114	Mutant group
HMGCLL1	1 (1.61%)	0 (0.00%)	0.114	Mutant group
HMX3	1 (1.61%)	0 (0.00%)	0.114	Mutant group
HNRNPF	1 (1.61%)	0 (0.00%)	0.114	Mutant group
HNRNPH3	1 (1.61%)	0 (0.00%)	0.114	Mutant group
HNRNPLL	1 (1.61%)	0 (0.00%)	0.114	Mutant group
HOXB3	1 (1.61%)	0 (0.00%)	0.114	Mutant group
HPCA	1 (1.61%)	0 (0.00%)	0.114	Mutant group
HSCB	1 (1.61%)	0 (0.00%)	0.114	Mutant group
HSDL2	1 (1.61%)	0 (0.00%)	0.114	Mutant group
HSF2BP	1 (1.61%)	0 (0.00%)	0.114	Mutant group
HSPA14	1 (1.61%)	0 (0.00%)	0.114	Mutant group
HTR2C	1 (1.61%)	0 (0.00%)	0.114	Mutant group
HYI	1 (1.61%)	0 (0.00%)	0.114	Mutant group
HYOU1	1 (1.61%)	0 (0.00%)	0.114	Mutant group
IDI2	1 (1.61%)	0 (0.00%)	0.114	Mutant group
IFNW1	1 (1.61%)	0 (0.00%)	0.114	Mutant group
IFT74	1 (1.61%)	0 (0.00%)	0.114	Mutant group
IK	1 (1.61%)	0 (0.00%)	0.114	Mutant group
IL17RB	1 (1.61%)	0 (0.00%)	0.114	Mutant group
IL5RA	1 (1.61%)	0 (0.00%)	0.114	Mutant group
ILKAP	1 (1.61%)	0 (0.00%)	0.114	Mutant group
INS	1 (1.61%)	0 (0.00%)	0.114	Mutant group
INSL6	1 (1.61%)	0 (0.00%)	0.114	Mutant group
INTS4	1 (1.61%)	0 (0.00%)	0.114	Mutant group
IRF1	1 (1.61%)	0 (0.00%)	0.114	Mutant group
IRF9	1 (1.61%)	0 (0.00%)	0.114	Mutant group
ITGAV	1 (1.61%)	0 (0.00%)	0.114	Mutant group
ITM2C	1 (1.61%)	0 (0.00%)	0.114	Mutant group
IVNS1ABP	1 (1.61%)	0 (0.00%)	0.114	Mutant group
JADE2	1 (1.61%)	0 (0.00%)	0.114	Mutant group
JOSD2	1 (1.61%)	0 (0.00%)	0.114	Mutant group
KCNE1	1 (1.61%)	0 (0.00%)	0.114	Mutant group
KCNE3	1 (1.61%)	0 (0.00%)	0.114	Mutant group
KCNK17	1 (1.61%)	0 (0.00%)	0.114	Mutant group
KCNN3	1 (1.61%)	0 (0.00%)	0.114	Mutant group
KCTD15	1 (1.61%)	0 (0.00%)	0.114	Mutant group
KCTD20	1 (1.61%)	0 (0.00%)	0.114	Mutant group
KDF1	1 (1.61%)	0 (0.00%)	0.114	Mutant group
KIAA1755	1 (1.61%)	0 (0.00%)	0.114	Mutant group
KIAA1958	1 (1.61%)	0 (0.00%)	0.114	Mutant group
KIF9	1 (1.61%)	0 (0.00%)	0.114	Mutant group
KIRREL1	1 (1.61%)	0 (0.00%)	0.114	Mutant group
KIRREL3	1 (1.61%)	0 (0.00%)	0.114	Mutant group
KLB	1 (1.61%)	0 (0.00%)	0.114	Mutant group
KLF10	1 (1.61%)	0 (0.00%)	0.114	Mutant group
KLF3	1 (1.61%)	0 (0.00%)	0.114	Mutant group
KLF7	1 (1.61%)	0 (0.00%)	0.114	Mutant group
KLF8	1 (1.61%)	0 (0.00%)	0.114	Mutant group
KLF9	1 (1.61%)	0 (0.00%)	0.114	Mutant group
KLK14	1 (1.61%)	0 (0.00%)	0.114	Mutant group
KRT17	1 (1.61%)	0 (0.00%)	0.114	Mutant group
KRT2	1 (1.61%)	0 (0.00%)	0.114	Mutant group
KRT78	1 (1.61%)	0 (0.00%)	0.114	Mutant group
KRT81	1 (1.61%)	0 (0.00%)	0.114	Mutant group
KRTAP10-10	1 (1.61%)	0 (0.00%)	0.114	Mutant group
KRTAP2-4	1 (1.61%)	0 (0.00%)	0.114	Mutant group
KRTAP22-1	1 (1.61%)	0 (0.00%)	0.114	Mutant group
KRTAP3-3	1 (1.61%)	0 (0.00%)	0.114	Mutant group
LACTB	1 (1.61%)	0 (0.00%)	0.114	Mutant group
LARP4	1 (1.61%)	0 (0.00%)	0.114	Mutant group
LARP4B	1 (1.61%)	0 (0.00%)	0.114	Mutant group
LCE2C	1 (1.61%)	0 (0.00%)	0.114	Mutant group
LCE3A	1 (1.61%)	0 (0.00%)	0.114	Mutant group
LCMT1	1 (1.61%)	0 (0.00%)	0.114	Mutant group
LCMT2	1 (1.61%)	0 (0.00%)	0.114	Mutant group
LCTL	1 (1.61%)	0 (0.00%)	0.114	Mutant group
LDHAL6A	1 (1.61%)	0 (0.00%)	0.114	Mutant group
LEO1	1 (1.61%)	0 (0.00%)	0.114	Mutant group
LGR6	1 (1.61%)	0 (0.00%)	0.114	Mutant group
LHX8	1 (1.61%)	0 (0.00%)	0.114	Mutant group
LINC01599	1 (1.61%)	0 (0.00%)	0.114	Mutant group
LINC02908	1 (1.61%)	0 (0.00%)	0.114	Mutant group
LIPF	1 (1.61%)	0 (0.00%)	0.114	Mutant group
LRIG1	1 (1.61%)	0 (0.00%)	0.114	Mutant group
LRP11	1 (1.61%)	0 (0.00%)	0.114	Mutant group
LRP2BP	1 (1.61%)	0 (0.00%)	0.114	Mutant group
LRP8	1 (1.61%)	0 (0.00%)	0.114	Mutant group
LRRC15	1 (1.61%)	0 (0.00%)	0.114	Mutant group
LRRC57	1 (1.61%)	0 (0.00%)	0.114	Mutant group
LRRC73	1 (1.61%)	0 (0.00%)	0.114	Mutant group
LRRC74A	1 (1.61%)	0 (0.00%)	0.114	Mutant group
LRRC75A	1 (1.61%)	0 (0.00%)	0.114	Mutant group
LRTM2	1 (1.61%)	0 (0.00%)	0.114	Mutant group
LTBP4	1 (1.61%)	0 (0.00%)	0.114	Mutant group
LY6G6F	1 (1.61%)	0 (0.00%)	0.114	Mutant group
MAGEA1	1 (1.61%)	0 (0.00%)	0.114	Mutant group
MAGEA4	1 (1.61%)	0 (0.00%)	0.114	Mutant group
MAML3	1 (1.61%)	0 (0.00%)	0.114	Mutant group
MAP2K1	1 (1.61%)	0 (0.00%)	0.114	Mutant group
MAPK1IP1L	1 (1.61%)	0 (0.00%)	0.114	Mutant group
MAPKAPK2	1 (1.61%)	0 (0.00%)	0.114	Mutant group
MARCHF9	1 (1.61%)	0 (0.00%)	0.114	Mutant group
MARK3	1 (1.61%)	0 (0.00%)	0.114	Mutant group
MARK4	1 (1.61%)	0 (0.00%)	0.114	Mutant group
MBIP	1 (1.61%)	0 (0.00%)	0.114	Mutant group
MBOAT7	1 (1.61%)	0 (0.00%)	0.114	Mutant group
MCHR1	1 (1.61%)	0 (0.00%)	0.114	Mutant group
MCM3AP	1 (1.61%)	0 (0.00%)	0.114	Mutant group
MCOLN2	1 (1.61%)	0 (0.00%)	0.114	Mutant group
MED17	1 (1.61%)	0 (0.00%)	0.114	Mutant group
MEFV	1 (1.61%)	0 (0.00%)	0.114	Mutant group
MEGF11	1 (1.61%)	0 (0.00%)	0.114	Mutant group
METTL1	1 (1.61%)	0 (0.00%)	0.114	Mutant group
METTL5	1 (1.61%)	0 (0.00%)	0.114	Mutant group
MFAP3L	1 (1.61%)	0 (0.00%)	0.114	Mutant group
MFGE8	1 (1.61%)	0 (0.00%)	0.114	Mutant group
MFN2	1 (1.61%)	0 (0.00%)	0.114	Mutant group
MFSD2A	1 (1.61%)	0 (0.00%)	0.114	Mutant group
MFSD5	1 (1.61%)	0 (0.00%)	0.114	Mutant group
MGMT	1 (1.61%)	0 (0.00%)	0.114	Mutant group
MICU1	1 (1.61%)	0 (0.00%)	0.114	Mutant group
MMP12	1 (1.61%)	0 (0.00%)	0.114	Mutant group
MN1	1 (1.61%)	0 (0.00%)	0.114	Mutant group
MNDA	1 (1.61%)	0 (0.00%)	0.114	Mutant group
MNS1	1 (1.61%)	0 (0.00%)	0.114	Mutant group
MNT	1 (1.61%)	0 (0.00%)	0.114	Mutant group
MOAP1	1 (1.61%)	0 (0.00%)	0.114	Mutant group
MON1B	1 (1.61%)	0 (0.00%)	0.114	Mutant group
MORC2	1 (1.61%)	0 (0.00%)	0.114	Mutant group
MORC3	1 (1.61%)	0 (0.00%)	0.114	Mutant group
MRAP2	1 (1.61%)	0 (0.00%)	0.114	Mutant group
MRPS25	1 (1.61%)	0 (0.00%)	0.114	Mutant group
MT1A	1 (1.61%)	0 (0.00%)	0.114	Mutant group
MTA3	1 (1.61%)	0 (0.00%)	0.114	Mutant group
MUL1	1 (1.61%)	0 (0.00%)	0.114	Mutant group
MYB	1 (1.61%)	0 (0.00%)	0.114	Mutant group
MYBPC3	1 (1.61%)	0 (0.00%)	0.114	Mutant group
MYCBPAP	1 (1.61%)	0 (0.00%)	0.114	Mutant group
MYCN	1 (1.61%)	0 (0.00%)	0.114	Mutant group
MYH10	1 (1.61%)	0 (0.00%)	0.114	Mutant group
MYO1E	1 (1.61%)	0 (0.00%)	0.114	Mutant group
MYRF	1 (1.61%)	0 (0.00%)	0.114	Mutant group
NAA38	1 (1.61%)	0 (0.00%)	0.114	Mutant group
NACAD	1 (1.61%)	0 (0.00%)	0.114	Mutant group
NACC2	1 (1.61%)	0 (0.00%)	0.114	Mutant group
NANP	1 (1.61%)	0 (0.00%)	0.114	Mutant group
NCKIPSD	1 (1.61%)	0 (0.00%)	0.114	Mutant group
NDRG4	1 (1.61%)	0 (0.00%)	0.114	Mutant group
NDUFB1	1 (1.61%)	0 (0.00%)	0.114	Mutant group
NDUFS2	1 (1.61%)	0 (0.00%)	0.114	Mutant group
NECTIN2	1 (1.61%)	0 (0.00%)	0.114	Mutant group
NEK2	1 (1.61%)	0 (0.00%)	0.114	Mutant group
NEMF	1 (1.61%)	0 (0.00%)	0.114	Mutant group
NEU1	1 (1.61%)	0 (0.00%)	0.114	Mutant group
NEURL2	1 (1.61%)	0 (0.00%)	0.114	Mutant group
NFIL3	1 (1.61%)	0 (0.00%)	0.114	Mutant group
NFKB1	1 (1.61%)	0 (0.00%)	0.114	Mutant group
NFYB	1 (1.61%)	0 (0.00%)	0.114	Mutant group
NICN1	1 (1.61%)	0 (0.00%)	0.114	Mutant group
NMRK2	1 (1.61%)	0 (0.00%)	0.114	Mutant group
NOC4L	1 (1.61%)	0 (0.00%)	0.114	Mutant group
NOL9	1 (1.61%)	0 (0.00%)	0.114	Mutant group
NOPCHAP1	1 (1.61%)	0 (0.00%)	0.114	Mutant group
NPL	1 (1.61%)	0 (0.00%)	0.114	Mutant group
NPRL3	1 (1.61%)	0 (0.00%)	0.114	Mutant group
NPSR1	1 (1.61%)	0 (0.00%)	0.114	Mutant group
NR2C2	1 (1.61%)	0 (0.00%)	0.114	Mutant group
NRG4	1 (1.61%)	0 (0.00%)	0.114	Mutant group
NSUN2	1 (1.61%)	0 (0.00%)	0.114	Mutant group
NTNG1	1 (1.61%)	0 (0.00%)	0.114	Mutant group
NUDT2	1 (1.61%)	0 (0.00%)	0.114	Mutant group
NUDT4	1 (1.61%)	0 (0.00%)	0.114	Mutant group
NUF2	1 (1.61%)	0 (0.00%)	0.114	Mutant group
NUP62CL	1 (1.61%)	0 (0.00%)	0.114	Mutant group
NUTM2G	1 (1.61%)	0 (0.00%)	0.114	Mutant group
ODAM	1 (1.61%)	0 (0.00%)	0.114	Mutant group
OGA	1 (1.61%)	0 (0.00%)	0.114	Mutant group
OLFM4	1 (1.61%)	0 (0.00%)	0.114	Mutant group
OPTN	1 (1.61%)	0 (0.00%)	0.114	Mutant group
OR10W1	1 (1.61%)	0 (0.00%)	0.114	Mutant group
OR1A2	1 (1.61%)	0 (0.00%)	0.114	Mutant group
OR1B1	1 (1.61%)	0 (0.00%)	0.114	Mutant group
OR1D5	1 (1.61%)	0 (0.00%)	0.114	Mutant group
OR1J1	1 (1.61%)	0 (0.00%)	0.114	Mutant group
OR2AE1	1 (1.61%)	0 (0.00%)	0.114	Mutant group
OR4E2	1 (1.61%)	0 (0.00%)	0.114	Mutant group
OR51A4	1 (1.61%)	0 (0.00%)	0.114	Mutant group
OR51A7	1 (1.61%)	0 (0.00%)	0.114	Mutant group
OR6C1	1 (1.61%)	0 (0.00%)	0.114	Mutant group
OR6C68	1 (1.61%)	0 (0.00%)	0.114	Mutant group
OR9I1	1 (1.61%)	0 (0.00%)	0.114	Mutant group
ORC5	1 (1.61%)	0 (0.00%)	0.114	Mutant group
OTOL1	1 (1.61%)	0 (0.00%)	0.114	Mutant group
OXA1L	1 (1.61%)	0 (0.00%)	0.114	Mutant group
P2RY13	1 (1.61%)	0 (0.00%)	0.114	Mutant group
P3H4	1 (1.61%)	0 (0.00%)	0.114	Mutant group
PABIR1	1 (1.61%)	0 (0.00%)	0.114	Mutant group
PABPC5	1 (1.61%)	0 (0.00%)	0.114	Mutant group
PAN2	1 (1.61%)	0 (0.00%)	0.114	Mutant group
PAOX	1 (1.61%)	0 (0.00%)	0.114	Mutant group
PAQR3	1 (1.61%)	0 (0.00%)	0.114	Mutant group
PARS2	1 (1.61%)	0 (0.00%)	0.114	Mutant group
PARVG	1 (1.61%)	0 (0.00%)	0.114	Mutant group
PAWR	1 (1.61%)	0 (0.00%)	0.114	Mutant group
PCCB	1 (1.61%)	0 (0.00%)	0.114	Mutant group
PCDHGB6	1 (1.61%)	0 (0.00%)	0.114	Mutant group
PCID2	1 (1.61%)	0 (0.00%)	0.114	Mutant group
PCNX4	1 (1.61%)	0 (0.00%)	0.114	Mutant group
PDCD1	1 (1.61%)	0 (0.00%)	0.114	Mutant group
PDE4B	1 (1.61%)	0 (0.00%)	0.114	Mutant group
PDE8B	1 (1.61%)	0 (0.00%)	0.114	Mutant group
PELI1	1 (1.61%)	0 (0.00%)	0.114	Mutant group
PEX11A	1 (1.61%)	0 (0.00%)	0.114	Mutant group
PFKFB4	1 (1.61%)	0 (0.00%)	0.114	Mutant group
PFKL	1 (1.61%)	0 (0.00%)	0.114	Mutant group
PGA5	1 (1.61%)	0 (0.00%)	0.114	Mutant group
PGPEP1L	1 (1.61%)	0 (0.00%)	0.114	Mutant group
PHETA2	1 (1.61%)	0 (0.00%)	0.114	Mutant group
PHEX	1 (1.61%)	0 (0.00%)	0.114	Mutant group
PHF1	1 (1.61%)	0 (0.00%)	0.114	Mutant group
PHF8	1 (1.61%)	0 (0.00%)	0.114	Mutant group
PHLPP1	1 (1.61%)	0 (0.00%)	0.114	Mutant group
PHOSPHO2	1 (1.61%)	0 (0.00%)	0.114	Mutant group
PI4K2A	1 (1.61%)	0 (0.00%)	0.114	Mutant group
PIF1	1 (1.61%)	0 (0.00%)	0.114	Mutant group
PIK3C2A	1 (1.61%)	0 (0.00%)	0.114	Mutant group
PIK3R3	1 (1.61%)	0 (0.00%)	0.114	Mutant group
PILRA	1 (1.61%)	0 (0.00%)	0.114	Mutant group
PIP4P2	1 (1.61%)	0 (0.00%)	0.114	Mutant group
PJVK	1 (1.61%)	0 (0.00%)	0.114	Mutant group
PLA2G2F	1 (1.61%)	0 (0.00%)	0.114	Mutant group
PLA2G4E	1 (1.61%)	0 (0.00%)	0.114	Mutant group
PLA2G4F	1 (1.61%)	0 (0.00%)	0.114	Mutant group
PLD4	1 (1.61%)	0 (0.00%)	0.114	Mutant group
PLEKHG7	1 (1.61%)	0 (0.00%)	0.114	Mutant group
PLEKHM2	1 (1.61%)	0 (0.00%)	0.114	Mutant group
PLPPR3	1 (1.61%)	0 (0.00%)	0.114	Mutant group
PMEPA1	1 (1.61%)	0 (0.00%)	0.114	Mutant group
PMPCA	1 (1.61%)	0 (0.00%)	0.114	Mutant group
PNLIP	1 (1.61%)	0 (0.00%)	0.114	Mutant group
PNPLA2	1 (1.61%)	0 (0.00%)	0.114	Mutant group
PNPLA5	1 (1.61%)	0 (0.00%)	0.114	Mutant group
POLD1	1 (1.61%)	0 (0.00%)	0.114	Mutant group
POLD4	1 (1.61%)	0 (0.00%)	0.114	Mutant group
POLR3G	1 (1.61%)	0 (0.00%)	0.114	Mutant group
POU2F2	1 (1.61%)	0 (0.00%)	0.114	Mutant group
POU4F3	1 (1.61%)	0 (0.00%)	0.114	Mutant group
POU5F1	1 (1.61%)	0 (0.00%)	0.114	Mutant group
POU5F2	1 (1.61%)	0 (0.00%)	0.114	Mutant group
PPA2	1 (1.61%)	0 (0.00%)	0.114	Mutant group
PPDPF	1 (1.61%)	0 (0.00%)	0.114	Mutant group
PPM1B	1 (1.61%)	0 (0.00%)	0.114	Mutant group
PPM1D	1 (1.61%)	0 (0.00%)	0.114	Mutant group
PPM1L	1 (1.61%)	0 (0.00%)	0.114	Mutant group
PPM1N	1 (1.61%)	0 (0.00%)	0.114	Mutant group
PPP1R16A	1 (1.61%)	0 (0.00%)	0.114	Mutant group
PPP4R2	1 (1.61%)	0 (0.00%)	0.114	Mutant group
PPP6R1	1 (1.61%)	0 (0.00%)	0.114	Mutant group
PRIM1	1 (1.61%)	0 (0.00%)	0.114	Mutant group
PRKD2	1 (1.61%)	0 (0.00%)	0.114	Mutant group
PRKX	1 (1.61%)	0 (0.00%)	0.114	Mutant group
PRMT8	1 (1.61%)	0 (0.00%)	0.114	Mutant group
PRPF3	1 (1.61%)	0 (0.00%)	0.114	Mutant group
PRPF4	1 (1.61%)	0 (0.00%)	0.114	Mutant group
PRPF4B	1 (1.61%)	0 (0.00%)	0.114	Mutant group
PRPSAP1	1 (1.61%)	0 (0.00%)	0.114	Mutant group
PRR27	1 (1.61%)	0 (0.00%)	0.114	Mutant group
PRRC2A	1 (1.61%)	0 (0.00%)	0.114	Mutant group
PSORS1C1	1 (1.61%)	0 (0.00%)	0.114	Mutant group
PSTPIP2	1 (1.61%)	0 (0.00%)	0.114	Mutant group
PTCH1	1 (1.61%)	0 (0.00%)	0.114	Mutant group
PTGER4	1 (1.61%)	0 (0.00%)	0.114	Mutant group
PTGFR	1 (1.61%)	0 (0.00%)	0.114	Mutant group
PTK7	1 (1.61%)	0 (0.00%)	0.114	Mutant group
PUDP	1 (1.61%)	0 (0.00%)	0.114	Mutant group
RAB24	1 (1.61%)	0 (0.00%)	0.114	Mutant group
RAP2A	1 (1.61%)	0 (0.00%)	0.114	Mutant group
RAPGEF5	1 (1.61%)	0 (0.00%)	0.114	Mutant group
RASSF2	1 (1.61%)	0 (0.00%)	0.114	Mutant group
RASSF5	1 (1.61%)	0 (0.00%)	0.114	Mutant group
RBBP4	1 (1.61%)	0 (0.00%)	0.114	Mutant group
RBM3	1 (1.61%)	0 (0.00%)	0.114	Mutant group
RBM48	1 (1.61%)	0 (0.00%)	0.114	Mutant group
RBP2	1 (1.61%)	0 (0.00%)	0.114	Mutant group
RBSN	1 (1.61%)	0 (0.00%)	0.114	Mutant group
RC3H2	1 (1.61%)	0 (0.00%)	0.114	Mutant group
RCOR1	1 (1.61%)	0 (0.00%)	0.114	Mutant group
RECQL4	1 (1.61%)	0 (0.00%)	0.114	Mutant group
REEP6	1 (1.61%)	0 (0.00%)	0.114	Mutant group
RFX3	1 (1.61%)	0 (0.00%)	0.114	Mutant group
RGR	1 (1.61%)	0 (0.00%)	0.114	Mutant group
RILP	1 (1.61%)	0 (0.00%)	0.114	Mutant group
RIMS3	1 (1.61%)	0 (0.00%)	0.114	Mutant group
RIPPLY3	1 (1.61%)	0 (0.00%)	0.114	Mutant group
RIT1	1 (1.61%)	0 (0.00%)	0.114	Mutant group
RIT2	1 (1.61%)	0 (0.00%)	0.114	Mutant group
RNASE4	1 (1.61%)	0 (0.00%)	0.114	Mutant group
RNASET2	1 (1.61%)	0 (0.00%)	0.114	Mutant group
RNF113A	1 (1.61%)	0 (0.00%)	0.114	Mutant group
RNF141	1 (1.61%)	0 (0.00%)	0.114	Mutant group
RNF148	1 (1.61%)	0 (0.00%)	0.114	Mutant group
RNF151	1 (1.61%)	0 (0.00%)	0.114	Mutant group
RNF152	1 (1.61%)	0 (0.00%)	0.114	Mutant group
RNF26	1 (1.61%)	0 (0.00%)	0.114	Mutant group
RNPEP	1 (1.61%)	0 (0.00%)	0.114	Mutant group
RPAIN	1 (1.61%)	0 (0.00%)	0.114	Mutant group
RPL22	1 (1.61%)	0 (0.00%)	0.114	Mutant group
RPS21	1 (1.61%)	0 (0.00%)	0.114	Mutant group
RPS6KC1	1 (1.61%)	0 (0.00%)	0.114	Mutant group
RRAD	1 (1.61%)	0 (0.00%)	0.114	Mutant group
RRM2	1 (1.61%)	0 (0.00%)	0.114	Mutant group
RTN2	1 (1.61%)	0 (0.00%)	0.114	Mutant group
RTN4RL2	1 (1.61%)	0 (0.00%)	0.114	Mutant group
RTTN	1 (1.61%)	0 (0.00%)	0.114	Mutant group
RUNDC3B	1 (1.61%)	0 (0.00%)	0.114	Mutant group
SALL2	1 (1.61%)	0 (0.00%)	0.114	Mutant group
SAMHD1	1 (1.61%)	0 (0.00%)	0.114	Mutant group
SCAP	1 (1.61%)	0 (0.00%)	0.114	Mutant group
SCAPER	1 (1.61%)	0 (0.00%)	0.114	Mutant group
SCARF2	1 (1.61%)	0 (0.00%)	0.114	Mutant group
SDC2	1 (1.61%)	0 (0.00%)	0.114	Mutant group
SELENOT	1 (1.61%)	0 (0.00%)	0.114	Mutant group
SEMA4C	1 (1.61%)	0 (0.00%)	0.114	Mutant group
SEMA4D	1 (1.61%)	0 (0.00%)	0.114	Mutant group
SERPINA5	1 (1.61%)	0 (0.00%)	0.114	Mutant group
SERPINB5	1 (1.61%)	0 (0.00%)	0.114	Mutant group
SF3B4	1 (1.61%)	0 (0.00%)	0.114	Mutant group
SFN	1 (1.61%)	0 (0.00%)	0.114	Mutant group
SFTPB	1 (1.61%)	0 (0.00%)	0.114	Mutant group
SGMS2	1 (1.61%)	0 (0.00%)	0.114	Mutant group
SH3BP5L	1 (1.61%)	0 (0.00%)	0.114	Mutant group
SH3D19	1 (1.61%)	0 (0.00%)	0.114	Mutant group
SHLD1	1 (1.61%)	0 (0.00%)	0.114	Mutant group
SHPK	1 (1.61%)	0 (0.00%)	0.114	Mutant group
SIGLEC14	1 (1.61%)	0 (0.00%)	0.114	Mutant group
SIM2	1 (1.61%)	0 (0.00%)	0.114	Mutant group
SIRT5	1 (1.61%)	0 (0.00%)	0.114	Mutant group
SKIC8	1 (1.61%)	0 (0.00%)	0.114	Mutant group
SLAMF1	1 (1.61%)	0 (0.00%)	0.114	Mutant group
SLC10A4	1 (1.61%)	0 (0.00%)	0.114	Mutant group
SLC16A13	1 (1.61%)	0 (0.00%)	0.114	Mutant group
SLC18A3	1 (1.61%)	0 (0.00%)	0.114	Mutant group
SLC22A20P	1 (1.61%)	0 (0.00%)	0.114	Mutant group
SLC27A1	1 (1.61%)	0 (0.00%)	0.114	Mutant group
SLC30A4	1 (1.61%)	0 (0.00%)	0.114	Mutant group
SLC30A7	1 (1.61%)	0 (0.00%)	0.114	Mutant group
SLC35B3	1 (1.61%)	0 (0.00%)	0.114	Mutant group
SLC35C1	1 (1.61%)	0 (0.00%)	0.114	Mutant group
SLC44A2	1 (1.61%)	0 (0.00%)	0.114	Mutant group
SLC44A4	1 (1.61%)	0 (0.00%)	0.114	Mutant group
SLC47A2	1 (1.61%)	0 (0.00%)	0.114	Mutant group
SLC49A4	1 (1.61%)	0 (0.00%)	0.114	Mutant group
SLC52A3	1 (1.61%)	0 (0.00%)	0.114	Mutant group
SLC66A3	1 (1.61%)	0 (0.00%)	0.114	Mutant group
SLC6A16	1 (1.61%)	0 (0.00%)	0.114	Mutant group
SLC7A10	1 (1.61%)	0 (0.00%)	0.114	Mutant group
SLC7A8	1 (1.61%)	0 (0.00%)	0.114	Mutant group
SLC8B1	1 (1.61%)	0 (0.00%)	0.114	Mutant group
SLC9A3	1 (1.61%)	0 (0.00%)	0.114	Mutant group
SLCO1B3	1 (1.61%)	0 (0.00%)	0.114	Mutant group
SLFN5	1 (1.61%)	0 (0.00%)	0.114	Mutant group
SLU7	1 (1.61%)	0 (0.00%)	0.114	Mutant group
SMAGP	1 (1.61%)	0 (0.00%)	0.114	Mutant group
SMTN	1 (1.61%)	0 (0.00%)	0.114	Mutant group
SOCS4	1 (1.61%)	0 (0.00%)	0.114	Mutant group
SOX30	1 (1.61%)	0 (0.00%)	0.114	Mutant group
SOX6	1 (1.61%)	0 (0.00%)	0.114	Mutant group
SPACA1	1 (1.61%)	0 (0.00%)	0.114	Mutant group
SPANXC	1 (1.61%)	0 (0.00%)	0.114	Mutant group
SPART	1 (1.61%)	0 (0.00%)	0.114	Mutant group
SPAST	1 (1.61%)	0 (0.00%)	0.114	Mutant group
SPATA16	1 (1.61%)	0 (0.00%)	0.114	Mutant group
SPDYC	1 (1.61%)	0 (0.00%)	0.114	Mutant group
SPICE1	1 (1.61%)	0 (0.00%)	0.114	Mutant group
SPINK6	1 (1.61%)	0 (0.00%)	0.114	Mutant group
SPON2	1 (1.61%)	0 (0.00%)	0.114	Mutant group
SRF	1 (1.61%)	0 (0.00%)	0.114	Mutant group
SRGAP3	1 (1.61%)	0 (0.00%)	0.114	Mutant group
SRMS	1 (1.61%)	0 (0.00%)	0.114	Mutant group
SRPX2	1 (1.61%)	0 (0.00%)	0.114	Mutant group
SRSF2	1 (1.61%)	0 (0.00%)	0.114	Mutant group
SRSF6	1 (1.61%)	0 (0.00%)	0.114	Mutant group
SSR2	1 (1.61%)	0 (0.00%)	0.114	Mutant group
SSR3	1 (1.61%)	0 (0.00%)	0.114	Mutant group
SSRP1	1 (1.61%)	0 (0.00%)	0.114	Mutant group
SSX3	1 (1.61%)	0 (0.00%)	0.114	Mutant group
SSX6P	1 (1.61%)	0 (0.00%)	0.114	Mutant group
STAR	1 (1.61%)	0 (0.00%)	0.114	Mutant group
STAT2	1 (1.61%)	0 (0.00%)	0.114	Mutant group
STIP1	1 (1.61%)	0 (0.00%)	0.114	Mutant group
STK19	1 (1.61%)	0 (0.00%)	0.114	Mutant group
STK38L	1 (1.61%)	0 (0.00%)	0.114	Mutant group
STOX2	1 (1.61%)	0 (0.00%)	0.114	Mutant group
STRBP	1 (1.61%)	0 (0.00%)	0.114	Mutant group
SUCLA2	1 (1.61%)	0 (0.00%)	0.114	Mutant group
SUDS3	1 (1.61%)	0 (0.00%)	0.114	Mutant group
SUV39H2	1 (1.61%)	0 (0.00%)	0.114	Mutant group
SUZ12	1 (1.61%)	0 (0.00%)	0.114	Mutant group
SV2B	1 (1.61%)	0 (0.00%)	0.114	Mutant group
SYN1	1 (1.61%)	0 (0.00%)	0.114	Mutant group
SYNGR4	1 (1.61%)	0 (0.00%)	0.114	Mutant group
SYNPO2	1 (1.61%)	0 (0.00%)	0.114	Mutant group
SYT14	1 (1.61%)	0 (0.00%)	0.114	Mutant group
SYT6	1 (1.61%)	0 (0.00%)	0.114	Mutant group
TAB3	1 (1.61%)	0 (0.00%)	0.114	Mutant group
TAFA2	1 (1.61%)	0 (0.00%)	0.114	Mutant group
TAFA4	1 (1.61%)	0 (0.00%)	0.114	Mutant group
TAFA5	1 (1.61%)	0 (0.00%)	0.114	Mutant group
TAS2R20	1 (1.61%)	0 (0.00%)	0.114	Mutant group
TAX1BP3	1 (1.61%)	0 (0.00%)	0.114	Mutant group
TBC1D12	1 (1.61%)	0 (0.00%)	0.114	Mutant group
TBX18	1 (1.61%)	0 (0.00%)	0.114	Mutant group
TBXAS1	1 (1.61%)	0 (0.00%)	0.114	Mutant group
TCF4	1 (1.61%)	0 (0.00%)	0.114	Mutant group
TCHP	1 (1.61%)	0 (0.00%)	0.114	Mutant group
TCL1B	1 (1.61%)	0 (0.00%)	0.114	Mutant group
TEX30	1 (1.61%)	0 (0.00%)	0.114	Mutant group
TEX43	1 (1.61%)	0 (0.00%)	0.114	Mutant group
TFAP2A	1 (1.61%)	0 (0.00%)	0.114	Mutant group
TGDS	1 (1.61%)	0 (0.00%)	0.114	Mutant group
TGM4	1 (1.61%)	0 (0.00%)	0.114	Mutant group
TGS1	1 (1.61%)	0 (0.00%)	0.114	Mutant group
TIGD7	1 (1.61%)	0 (0.00%)	0.114	Mutant group
TIMM21	1 (1.61%)	0 (0.00%)	0.114	Mutant group
TIMM50	1 (1.61%)	0 (0.00%)	0.114	Mutant group
TLCD5	1 (1.61%)	0 (0.00%)	0.114	Mutant group
TLDC2	1 (1.61%)	0 (0.00%)	0.114	Mutant group
TLNRD1	1 (1.61%)	0 (0.00%)	0.114	Mutant group
TM4SF19	1 (1.61%)	0 (0.00%)	0.114	Mutant group
TMED5	1 (1.61%)	0 (0.00%)	0.114	Mutant group
TMEM115	1 (1.61%)	0 (0.00%)	0.114	Mutant group
TMEM126B	1 (1.61%)	0 (0.00%)	0.114	Mutant group
TMEM219	1 (1.61%)	0 (0.00%)	0.114	Mutant group
TMEM266	1 (1.61%)	0 (0.00%)	0.114	Mutant group
TMEM30A	1 (1.61%)	0 (0.00%)	0.114	Mutant group
TMEM59L	1 (1.61%)	0 (0.00%)	0.114	Mutant group
TMEM87B	1 (1.61%)	0 (0.00%)	0.114	Mutant group
TMIGD2	1 (1.61%)	0 (0.00%)	0.114	Mutant group
TNFRSF19	1 (1.61%)	0 (0.00%)	0.114	Mutant group
TNFSF18	1 (1.61%)	0 (0.00%)	0.114	Mutant group
TNKS	1 (1.61%)	0 (0.00%)	0.114	Mutant group
TNNT2	1 (1.61%)	0 (0.00%)	0.114	Mutant group
TNS4	1 (1.61%)	0 (0.00%)	0.114	Mutant group
TOP1	1 (1.61%)	0 (0.00%)	0.114	Mutant group
TPRG1	1 (1.61%)	0 (0.00%)	0.114	Mutant group
TPRN	1 (1.61%)	0 (0.00%)	0.114	Mutant group
TRAPPC12	1 (1.61%)	0 (0.00%)	0.114	Mutant group
TREML4	1 (1.61%)	0 (0.00%)	0.114	Mutant group
TREX2	1 (1.61%)	0 (0.00%)	0.114	Mutant group
TRH	1 (1.61%)	0 (0.00%)	0.114	Mutant group
TRIM14	1 (1.61%)	0 (0.00%)	0.114	Mutant group
TRIM33	1 (1.61%)	0 (0.00%)	0.114	Mutant group
TRIM43	1 (1.61%)	0 (0.00%)	0.114	Mutant group
TRIM49	1 (1.61%)	0 (0.00%)	0.114	Mutant group
TRIM50	1 (1.61%)	0 (0.00%)	0.114	Mutant group
TRIM65	1 (1.61%)	0 (0.00%)	0.114	Mutant group
TRIM73	1 (1.61%)	0 (0.00%)	0.114	Mutant group
TRIP10	1 (1.61%)	0 (0.00%)	0.114	Mutant group
TRIR	1 (1.61%)	0 (0.00%)	0.114	Mutant group
TSC22D1	1 (1.61%)	0 (0.00%)	0.114	Mutant group
TTC30B	1 (1.61%)	0 (0.00%)	0.114	Mutant group
TTC39A	1 (1.61%)	0 (0.00%)	0.114	Mutant group
TUBA1B	1 (1.61%)	0 (0.00%)	0.114	Mutant group
TUBA3D	1 (1.61%)	0 (0.00%)	0.114	Mutant group
TUBG2	1 (1.61%)	0 (0.00%)	0.114	Mutant group
TUT1	1 (1.61%)	0 (0.00%)	0.114	Mutant group
TUT4	1 (1.61%)	0 (0.00%)	0.114	Mutant group
TUT7	1 (1.61%)	0 (0.00%)	0.114	Mutant group
TWNK	1 (1.61%)	0 (0.00%)	0.114	Mutant group
TXNDC15	1 (1.61%)	0 (0.00%)	0.114	Mutant group
TXNIP	1 (1.61%)	0 (0.00%)	0.114	Mutant group
TXNRD1	1 (1.61%)	0 (0.00%)	0.114	Mutant group
TYW1	1 (1.61%)	0 (0.00%)	0.114	Mutant group
UBQLN4	1 (1.61%)	0 (0.00%)	0.114	Mutant group
UGT2B15	1 (1.61%)	0 (0.00%)	0.114	Mutant group
USP32	1 (1.61%)	0 (0.00%)	0.114	Mutant group
USP39	1 (1.61%)	0 (0.00%)	0.114	Mutant group
USP41	1 (1.61%)	0 (0.00%)	0.114	Mutant group
USP47	1 (1.61%)	0 (0.00%)	0.114	Mutant group
VANGL1	1 (1.61%)	0 (0.00%)	0.114	Mutant group
VAT1	1 (1.61%)	0 (0.00%)	0.114	Mutant group
VEPH1	1 (1.61%)	0 (0.00%)	0.114	Mutant group
VGLL2	1 (1.61%)	0 (0.00%)	0.114	Mutant group
VIPR2	1 (1.61%)	0 (0.00%)	0.114	Mutant group
VPS45	1 (1.61%)	0 (0.00%)	0.114	Mutant group
VSIR	1 (1.61%)	0 (0.00%)	0.114	Mutant group
WDR19	1 (1.61%)	0 (0.00%)	0.114	Mutant group
WDR36	1 (1.61%)	0 (0.00%)	0.114	Mutant group
WDR73	1 (1.61%)	0 (0.00%)	0.114	Mutant group
WDR74	1 (1.61%)	0 (0.00%)	0.114	Mutant group
WDR75	1 (1.61%)	0 (0.00%)	0.114	Mutant group
WDR91	1 (1.61%)	0 (0.00%)	0.114	Mutant group
WFDC11	1 (1.61%)	0 (0.00%)	0.114	Mutant group
WFDC3	1 (1.61%)	0 (0.00%)	0.114	Mutant group
WNK4	1 (1.61%)	0 (0.00%)	0.114	Mutant group
WRAP73	1 (1.61%)	0 (0.00%)	0.114	Mutant group
WRN	1 (1.61%)	0 (0.00%)	0.114	Mutant group
WSB2	1 (1.61%)	0 (0.00%)	0.114	Mutant group
WWP2	1 (1.61%)	0 (0.00%)	0.114	Mutant group
XRCC5	1 (1.61%)	0 (0.00%)	0.114	Mutant group
YWHAH-AS1	1 (1.61%)	0 (0.00%)	0.114	Mutant group
ZAR1	1 (1.61%)	0 (0.00%)	0.114	Mutant group
ZBTB37	1 (1.61%)	0 (0.00%)	0.114	Mutant group
ZBTB46	1 (1.61%)	0 (0.00%)	0.114	Mutant group
ZBTB7C	1 (1.61%)	0 (0.00%)	0.114	Mutant group
ZCCHC13	1 (1.61%)	0 (0.00%)	0.114	Mutant group
ZCCHC18	1 (1.61%)	0 (0.00%)	0.114	Mutant group
ZDHHC1	1 (1.61%)	0 (0.00%)	0.114	Mutant group
ZKSCAN2	1 (1.61%)	0 (0.00%)	0.114	Mutant group
ZMYM4	1 (1.61%)	0 (0.00%)	0.114	Mutant group
ZNF107	1 (1.61%)	0 (0.00%)	0.114	Mutant group
ZNF239	1 (1.61%)	0 (0.00%)	0.114	Mutant group
ZNF284	1 (1.61%)	0 (0.00%)	0.114	Mutant group
ZNF285	1 (1.61%)	0 (0.00%)	0.114	Mutant group
ZNF319	1 (1.61%)	0 (0.00%)	0.114	Mutant group
ZNF354C	1 (1.61%)	0 (0.00%)	0.114	Mutant group
ZNF433	1 (1.61%)	0 (0.00%)	0.114	Mutant group
ZNF449	1 (1.61%)	0 (0.00%)	0.114	Mutant group
ZNF45	1 (1.61%)	0 (0.00%)	0.114	Mutant group
ZNF491	1 (1.61%)	0 (0.00%)	0.114	Mutant group
ZNF528	1 (1.61%)	0 (0.00%)	0.114	Mutant group
ZNF564	1 (1.61%)	0 (0.00%)	0.114	Mutant group
ZNF57	1 (1.61%)	0 (0.00%)	0.114	Mutant group
ZNF570	1 (1.61%)	0 (0.00%)	0.114	Mutant group
ZNF625	1 (1.61%)	0 (0.00%)	0.114	Mutant group
ZNF653	1 (1.61%)	0 (0.00%)	0.114	Mutant group
ZNF680	1 (1.61%)	0 (0.00%)	0.114	Mutant group
ZNF700	1 (1.61%)	0 (0.00%)	0.114	Mutant group
ZNF716	1 (1.61%)	0 (0.00%)	0.114	Mutant group
ZNF805	1 (1.61%)	0 (0.00%)	0.114	Mutant group
ZNF829	1 (1.61%)	0 (0.00%)	0.114	Mutant group
ZNHIT3	1 (1.61%)	0 (0.00%)	0.114	Mutant group
ZNRF3	1 (1.61%)	0 (0.00%)	0.114	Mutant group
ZSWIM5	1 (1.61%)	0 (0.00%)	0.114	Mutant group
CFAP20DC	3 (4.84%)	3 (1.32%)	0.114	Mutant group
SLCO5A1	3 (4.84%)	3 (1.32%)	0.114	Mutant group
ZNF844	3 (4.84%)	3 (1.32%)	0.114	Mutant group
C5AR1	2 (3.23%)	1 (0.44%)	0.117	Mutant group
CHRM2	2 (3.23%)	1 (0.44%)	0.117	Mutant group
CHRND	2 (3.23%)	1 (0.44%)	0.117	Mutant group
CHSY3	2 (3.23%)	1 (0.44%)	0.117	Mutant group
CYP27B1	2 (3.23%)	1 (0.44%)	0.117	Mutant group
DLG4	2 (3.23%)	1 (0.44%)	0.117	Mutant group
EPHX4	2 (3.23%)	1 (0.44%)	0.117	Mutant group
FAM234B	2 (3.23%)	1 (0.44%)	0.117	Mutant group
FAP	2 (3.23%)	1 (0.44%)	0.117	Mutant group
GJD2	2 (3.23%)	1 (0.44%)	0.117	Mutant group
GPR132	2 (3.23%)	1 (0.44%)	0.117	Mutant group
HEMGN	2 (3.23%)	1 (0.44%)	0.117	Mutant group
HPS3	2 (3.23%)	1 (0.44%)	0.117	Mutant group
IQCE	2 (3.23%)	1 (0.44%)	0.117	Mutant group
IQGAP3	2 (3.23%)	1 (0.44%)	0.117	Mutant group
JAG1	2 (3.23%)	1 (0.44%)	0.117	Mutant group
LRRC66	2 (3.23%)	1 (0.44%)	0.117	Mutant group
MAP3K7	2 (3.23%)	1 (0.44%)	0.117	Mutant group
MC2R	2 (3.23%)	1 (0.44%)	0.117	Mutant group
MPL	2 (3.23%)	1 (0.44%)	0.117	Mutant group
MST1	2 (3.23%)	1 (0.44%)	0.117	Mutant group
NPBWR2	2 (3.23%)	1 (0.44%)	0.117	Mutant group
OR10AG1	2 (3.23%)	1 (0.44%)	0.117	Mutant group
OR11H12	2 (3.23%)	1 (0.44%)	0.117	Mutant group
OR13C8	2 (3.23%)	1 (0.44%)	0.117	Mutant group
OR2H1	2 (3.23%)	1 (0.44%)	0.117	Mutant group
OR51F1	2 (3.23%)	1 (0.44%)	0.117	Mutant group
PABPC4	2 (3.23%)	1 (0.44%)	0.117	Mutant group
PAK4	2 (3.23%)	1 (0.44%)	0.117	Mutant group
PARP4	2 (3.23%)	1 (0.44%)	0.117	Mutant group
PKD2	2 (3.23%)	1 (0.44%)	0.117	Mutant group
PNPLA7	2 (3.23%)	1 (0.44%)	0.117	Mutant group
PODXL	2 (3.23%)	1 (0.44%)	0.117	Mutant group
POTEH	2 (3.23%)	1 (0.44%)	0.117	Mutant group
POU4F2	2 (3.23%)	1 (0.44%)	0.117	Mutant group
PRAMEF11	2 (3.23%)	1 (0.44%)	0.117	Mutant group
PSG7	2 (3.23%)	1 (0.44%)	0.117	Mutant group
RXFP1	2 (3.23%)	1 (0.44%)	0.117	Mutant group
SEL1L2	2 (3.23%)	1 (0.44%)	0.117	Mutant group
SIN3A	2 (3.23%)	1 (0.44%)	0.117	Mutant group
SLC28A3	2 (3.23%)	1 (0.44%)	0.117	Mutant group
SLITRK2	2 (3.23%)	1 (0.44%)	0.117	Mutant group
TENT5C	2 (3.23%)	1 (0.44%)	0.117	Mutant group
UNC5C	2 (3.23%)	1 (0.44%)	0.117	Mutant group
UVRAG	2 (3.23%)	1 (0.44%)	0.117	Mutant group
ZNF282	2 (3.23%)	1 (0.44%)	0.117	Mutant group
PIK3R1	11 (11.83%)	36 (7.45%)	0.117	Mutant group
GALNT17	3 (4.84%)	8 (1.66%)	0.119	Mutant group
LRP1	3 (4.84%)	8 (1.66%)	0.119	Mutant group
PTPRC	3 (3.23%)	2 (0.78%)	0.121	Mutant group
CARD11	3 (3.23%)	5 (1.04%)	0.124	Mutant group
CD22	3 (3.23%)	5 (1.04%)	0.124	Mutant group
ENPEP	3 (3.23%)	5 (1.04%)	0.124	Mutant group
SPATA31D1	3 (3.23%)	5 (1.04%)	0.124	Mutant group
SVEP1	3 (3.23%)	5 (1.04%)	0.124	Mutant group
TIAM2	3 (3.23%)	5 (1.04%)	0.124	Mutant group
ZNF292	3 (3.23%)	5 (1.04%)	0.124	Mutant group
ABCC10	2 (2.15%)	2 (0.41%)	0.124	Mutant group
ADAM2	2 (2.15%)	2 (0.41%)	0.124	Mutant group
ARMH4	2 (2.15%)	2 (0.41%)	0.124	Mutant group
CEP170B	2 (2.15%)	2 (0.41%)	0.124	Mutant group
CNKSR2	2 (2.15%)	2 (0.41%)	0.124	Mutant group
CYP3A4	2 (2.15%)	2 (0.41%)	0.124	Mutant group
DCLK3	2 (2.15%)	2 (0.41%)	0.124	Mutant group
FGD6	2 (2.15%)	2 (0.41%)	0.124	Mutant group
GRM7	2 (2.15%)	2 (0.41%)	0.124	Mutant group
HTRA3	2 (2.15%)	2 (0.41%)	0.124	Mutant group
OR14A16	2 (2.15%)	2 (0.41%)	0.124	Mutant group
OR2Z1	2 (2.15%)	2 (0.41%)	0.124	Mutant group
PCDH18	2 (2.15%)	2 (0.41%)	0.124	Mutant group
PCF11	2 (2.15%)	2 (0.41%)	0.124	Mutant group
PCNX2	2 (2.15%)	2 (0.41%)	0.124	Mutant group
PLEKHG6	2 (2.15%)	2 (0.41%)	0.124	Mutant group
PRR23B	2 (2.15%)	2 (0.41%)	0.124	Mutant group
RNF31	2 (2.15%)	2 (0.41%)	0.124	Mutant group
SLCO2A1	2 (2.15%)	2 (0.41%)	0.124	Mutant group
UXS1	2 (2.15%)	2 (0.41%)	0.124	Mutant group
XKR9	2 (2.15%)	2 (0.41%)	0.124	Mutant group
CHL1	0 (0.00%)	6 (2.63%)	0.126	Non-mutant group
CNTNAP5	0 (0.00%)	6 (2.63%)	0.126	Non-mutant group
COL6A2	0 (0.00%)	6 (2.63%)	0.126	Non-mutant group
MMP13	0 (0.00%)	6 (2.63%)	0.126	Non-mutant group
PCDHB7	0 (0.00%)	6 (2.63%)	0.126	Non-mutant group
SAMD9L	0 (0.00%)	6 (2.63%)	0.126	Non-mutant group
WDR90	0 (0.00%)	6 (2.63%)	0.126	Non-mutant group
PTEN	21 (22.58%)	82 (16.98%)	0.127	Mutant group
FRG1BP	6 (9.68%)	11 (4.82%)	0.129	Mutant group
EGFR	19 (20.43%)	73 (15.11%)	0.131	Mutant group
ZBTB20	2 (6.45%)	9 (1.86%)	0.138	Mutant group
ABLIM3	2 (3.23%)	4 (0.83%)	0.141	Mutant group
CACNA1D	2 (3.23%)	4 (0.83%)	0.141	Mutant group
CFAP54	2 (3.23%)	4 (0.83%)	0.141	Mutant group
DEPDC5	2 (3.23%)	4 (0.83%)	0.141	Mutant group
EEF1A1	2 (3.23%)	4 (0.83%)	0.141	Mutant group
FGG	2 (3.23%)	4 (0.83%)	0.141	Mutant group
GRIA3	2 (3.23%)	4 (0.83%)	0.141	Mutant group
HEPHL1	2 (3.23%)	4 (0.83%)	0.141	Mutant group
HUWE1	2 (3.23%)	4 (0.83%)	0.141	Mutant group
NRK	2 (3.23%)	4 (0.83%)	0.141	Mutant group
PCDHGB3	2 (3.23%)	4 (0.83%)	0.141	Mutant group
PRKDC	2 (3.23%)	4 (0.83%)	0.141	Mutant group
QKI	2 (3.23%)	4 (0.83%)	0.141	Mutant group
RBFOX1	2 (3.23%)	4 (0.83%)	0.141	Mutant group
SLITRK6	2 (3.23%)	4 (0.83%)	0.141	Mutant group
TRAPPC8	2 (3.23%)	4 (0.83%)	0.141	Mutant group
USP6	2 (3.23%)	4 (0.83%)	0.141	Mutant group
VPS8	2 (3.23%)	4 (0.83%)	0.141	Mutant group
ZFHX3	2 (3.23%)	4 (0.83%)	0.141	Mutant group
HSPG2	4 (4.30%)	9 (1.86%)	0.143	Mutant group
PCLO	8 (8.60%)	25 (5.18%)	0.145	Mutant group
MUC2	3 (4.84%)	9 (1.86%)	0.146	Mutant group
AICDA	3 (3.23%)	2 (0.88%)	0.148	Mutant group
MYO18B	3 (3.23%)	2 (0.88%)	0.148	Mutant group
RBBP6	3 (3.23%)	2 (0.88%)	0.148	Mutant group
SIGLEC6	3 (3.23%)	2 (0.88%)	0.148	Mutant group
SPTAN1	3 (3.23%)	2 (0.88%)	0.148	Mutant group
TBC1D31	3 (3.23%)	2 (0.88%)	0.148	Mutant group
NBPF10	1 (1.61%)	13 (5.70%)	0.159	Non-mutant group
ACACA	3 (3.23%)	6 (1.24%)	0.165	Mutant group
ACACB	3 (3.23%)	6 (1.24%)	0.165	Mutant group
CELSR1	3 (3.23%)	6 (1.24%)	0.165	Mutant group
CHD5	3 (3.23%)	6 (1.24%)	0.165	Mutant group
PKHD1L1	3 (3.23%)	6 (1.24%)	0.165	Mutant group
SLC1A6	3 (3.23%)	6 (1.24%)	0.165	Mutant group
TG	3 (3.23%)	6 (1.24%)	0.165	Mutant group
AHNAK	0 (0.00%)	10 (2.07%)	0.169	Non-mutant group
DSG3	0 (0.00%)	10 (2.07%)	0.169	Non-mutant group
PTPN11	0 (0.00%)	10 (2.07%)	0.169	Non-mutant group
RYR1	0 (0.00%)	10 (2.07%)	0.169	Non-mutant group
TRPV6	0 (0.00%)	10 (2.07%)	0.169	Non-mutant group
OR5AR1	3 (4.84%)	4 (1.75%)	0.17	Mutant group
ADAMTS15	1 (3.23%)	2 (0.41%)	0.171	Mutant group
ADGRA3	1 (3.23%)	2 (0.41%)	0.171	Mutant group
ADGRG2	1 (3.23%)	2 (0.41%)	0.171	Mutant group
CIT	1 (3.23%)	2 (0.41%)	0.171	Mutant group
DEAF1	1 (3.23%)	2 (0.41%)	0.171	Mutant group
DHX38	1 (3.23%)	2 (0.41%)	0.171	Mutant group
EXTL1	1 (3.23%)	2 (0.41%)	0.171	Mutant group
FBXL13	1 (3.23%)	2 (0.41%)	0.171	Mutant group
FHOD3	1 (3.23%)	2 (0.41%)	0.171	Mutant group
GNAO1	1 (3.23%)	2 (0.41%)	0.171	Mutant group
GPR50	1 (3.23%)	2 (0.41%)	0.171	Mutant group
GRIN2D	1 (3.23%)	2 (0.41%)	0.171	Mutant group
GUCY2C	1 (3.23%)	2 (0.41%)	0.171	Mutant group
HCFC1	1 (3.23%)	2 (0.41%)	0.171	Mutant group
HDAC4	1 (3.23%)	2 (0.41%)	0.171	Mutant group
IL16	1 (3.23%)	2 (0.41%)	0.171	Mutant group
LIMCH1	1 (3.23%)	2 (0.41%)	0.171	Mutant group
MTA2	1 (3.23%)	2 (0.41%)	0.171	Mutant group
MYCBP2	1 (3.23%)	2 (0.41%)	0.171	Mutant group
OOSP2	1 (3.23%)	2 (0.41%)	0.171	Mutant group
OR1C1	1 (3.23%)	2 (0.41%)	0.171	Mutant group
OR1D2	1 (3.23%)	2 (0.41%)	0.171	Mutant group
PALM	1 (3.23%)	2 (0.41%)	0.171	Mutant group
PI4KA	1 (3.23%)	2 (0.41%)	0.171	Mutant group
POLA1	1 (3.23%)	2 (0.41%)	0.171	Mutant group
PTER	1 (3.23%)	2 (0.41%)	0.171	Mutant group
RBM33	1 (3.23%)	2 (0.41%)	0.171	Mutant group
RIOK3	1 (3.23%)	2 (0.41%)	0.171	Mutant group
RXFP2	1 (3.23%)	2 (0.41%)	0.171	Mutant group
SMARCA1	1 (3.23%)	2 (0.41%)	0.171	Mutant group
TIMELESS	1 (3.23%)	2 (0.41%)	0.171	Mutant group
TRIM13	1 (3.23%)	2 (0.41%)	0.171	Mutant group
TRMT13	1 (3.23%)	2 (0.41%)	0.171	Mutant group
TRPV2	1 (3.23%)	2 (0.41%)	0.171	Mutant group
TSHR	1 (3.23%)	2 (0.41%)	0.171	Mutant group
ZBTB21	1 (3.23%)	2 (0.41%)	0.171	Mutant group
ZFX	1 (3.23%)	2 (0.41%)	0.171	Mutant group
ZNF560	1 (3.23%)	2 (0.41%)	0.171	Mutant group
ZNF770	1 (3.23%)	2 (0.41%)	0.171	Mutant group
BAIAP2L1	2 (3.23%)	2 (0.78%)	0.173	Mutant group
CYP1A2	2 (3.23%)	2 (0.78%)	0.173	Mutant group
FRY	2 (3.23%)	2 (0.78%)	0.173	Mutant group
ITIH4	2 (3.23%)	2 (0.78%)	0.173	Mutant group
MIPEP	2 (3.23%)	2 (0.78%)	0.173	Mutant group
USP51	2 (3.23%)	2 (0.78%)	0.173	Mutant group
MGAM	4 (4.30%)	4 (1.75%)	0.173	Mutant group
ACOT9	2 (2.15%)	1 (0.39%)	0.175	Mutant group
ARMC9	2 (2.15%)	1 (0.39%)	0.175	Mutant group
CACNA1F	2 (2.15%)	1 (0.39%)	0.175	Mutant group
CALHM2	2 (2.15%)	1 (0.39%)	0.175	Mutant group
CBLL2	2 (2.15%)	1 (0.39%)	0.175	Mutant group
CD1B	2 (2.15%)	1 (0.39%)	0.175	Mutant group
CTIF	2 (2.15%)	1 (0.39%)	0.175	Mutant group
DHX35	2 (2.15%)	1 (0.39%)	0.175	Mutant group
GDI1	2 (2.15%)	1 (0.39%)	0.175	Mutant group
KIF26B	2 (2.15%)	1 (0.39%)	0.175	Mutant group
MYORG	2 (2.15%)	1 (0.39%)	0.175	Mutant group
RANBP2	2 (2.15%)	1 (0.39%)	0.175	Mutant group
RGN	2 (2.15%)	1 (0.39%)	0.175	Mutant group
RREB1	2 (2.15%)	1 (0.39%)	0.175	Mutant group
SHROOM4	2 (2.15%)	1 (0.39%)	0.175	Mutant group
THSD7B	4 (4.30%)	10 (2.07%)	0.176	Mutant group
ADAMTS19	0 (0.00%)	5 (2.19%)	0.178	Non-mutant group
AZGP1	0 (0.00%)	5 (2.19%)	0.178	Non-mutant group
C9ORF131	0 (0.00%)	5 (2.19%)	0.178	Non-mutant group
CARMIL2	0 (0.00%)	5 (2.19%)	0.178	Non-mutant group
CFHR4	0 (0.00%)	5 (2.19%)	0.178	Non-mutant group
COL6A6	0 (0.00%)	5 (2.19%)	0.178	Non-mutant group
ITGB2	0 (0.00%)	5 (2.19%)	0.178	Non-mutant group
MYO1A	0 (0.00%)	5 (2.19%)	0.178	Non-mutant group
NME8	0 (0.00%)	5 (2.19%)	0.178	Non-mutant group
NOX3	0 (0.00%)	5 (2.19%)	0.178	Non-mutant group
OR5W2	0 (0.00%)	5 (2.19%)	0.178	Non-mutant group
RGPD8	0 (0.00%)	5 (2.19%)	0.178	Non-mutant group
SH3RF2	0 (0.00%)	5 (2.19%)	0.178	Non-mutant group
TRPM3	0 (0.00%)	5 (2.19%)	0.178	Non-mutant group
KEL	4 (6.45%)	16 (3.31%)	0.183	Mutant group
DOCK2	2 (3.23%)	5 (1.04%)	0.184	Mutant group
FAT3	2 (3.23%)	5 (1.04%)	0.184	Mutant group
GARIN3	2 (3.23%)	5 (1.04%)	0.184	Mutant group
HERC1	2 (3.23%)	5 (1.04%)	0.184	Mutant group
LAMC3	2 (3.23%)	5 (1.04%)	0.184	Mutant group
MAST4	2 (3.23%)	5 (1.04%)	0.184	Mutant group
MYH15	2 (3.23%)	5 (1.04%)	0.184	Mutant group
PCDHGA1	2 (3.23%)	5 (1.04%)	0.184	Mutant group
SPEF2	2 (3.23%)	5 (1.04%)	0.184	Mutant group
ST6GAL2	2 (3.23%)	5 (1.04%)	0.184	Mutant group
TRIM51	2 (3.23%)	5 (1.04%)	0.184	Mutant group
AKAP6	2 (2.15%)	3 (0.62%)	0.186	Mutant group
CD44	2 (2.15%)	3 (0.62%)	0.186	Mutant group
CDH4	2 (2.15%)	3 (0.62%)	0.186	Mutant group
INTS6L	2 (2.15%)	3 (0.62%)	0.186	Mutant group
LCT	2 (2.15%)	3 (0.62%)	0.186	Mutant group
NEU2	2 (2.15%)	3 (0.62%)	0.186	Mutant group
RGS3	2 (2.15%)	3 (0.62%)	0.186	Mutant group
SALL3	2 (2.15%)	3 (0.62%)	0.186	Mutant group
TSC2	2 (2.15%)	3 (0.62%)	0.186	Mutant group
XK	2 (2.15%)	3 (0.62%)	0.186	Mutant group
ZAP70	2 (2.15%)	3 (0.62%)	0.186	Mutant group
ZNF814	4 (6.45%)	7 (3.07%)	0.189	Mutant group
FLG	9 (9.68%)	32 (6.63%)	0.2	Mutant group
ADAMTS10	2 (3.23%)	2 (0.88%)	0.201	Mutant group
ASCC3	2 (3.23%)	2 (0.88%)	0.201	Mutant group
ATP6V0A4	2 (3.23%)	2 (0.88%)	0.201	Mutant group
BIRC6	2 (3.23%)	2 (0.88%)	0.201	Mutant group
BMP5	2 (3.23%)	2 (0.88%)	0.201	Mutant group
CD1D	2 (3.23%)	2 (0.88%)	0.201	Mutant group
CD33	2 (3.23%)	2 (0.88%)	0.201	Mutant group
CEMIP2	2 (3.23%)	2 (0.88%)	0.201	Mutant group
CLCN1	2 (3.23%)	2 (0.88%)	0.201	Mutant group
CPSF6	2 (3.23%)	2 (0.88%)	0.201	Mutant group
FBXL12	2 (3.23%)	2 (0.88%)	0.201	Mutant group
FOXG1	2 (3.23%)	2 (0.88%)	0.201	Mutant group
GOLGA6L10	2 (3.23%)	2 (0.88%)	0.201	Mutant group
HIPK2	2 (3.23%)	2 (0.88%)	0.201	Mutant group
IFT172	2 (3.23%)	2 (0.88%)	0.201	Mutant group
LGI2	2 (3.23%)	2 (0.88%)	0.201	Mutant group
NEBL	2 (3.23%)	2 (0.88%)	0.201	Mutant group
NEFM	2 (3.23%)	2 (0.88%)	0.201	Mutant group
OR2A12	2 (3.23%)	2 (0.88%)	0.201	Mutant group
PABPC3	2 (3.23%)	2 (0.88%)	0.201	Mutant group
PCDHGA8	2 (3.23%)	2 (0.88%)	0.201	Mutant group
RADX	2 (3.23%)	2 (0.88%)	0.201	Mutant group
RBMS3	2 (3.23%)	2 (0.88%)	0.201	Mutant group
SLC4A1	2 (3.23%)	2 (0.88%)	0.201	Mutant group
STAB1	2 (3.23%)	2 (0.88%)	0.201	Mutant group
TLL1	2 (3.23%)	2 (0.88%)	0.201	Mutant group
TMPRSS7	2 (3.23%)	2 (0.88%)	0.201	Mutant group
UGT3A2	2 (3.23%)	2 (0.88%)	0.201	Mutant group
ACAD8	2 (2.15%)	1 (0.44%)	0.202	Mutant group
ADAMTSL1	2 (2.15%)	1 (0.44%)	0.202	Mutant group
ALPK3	2 (2.15%)	1 (0.44%)	0.202	Mutant group
CCER1	2 (2.15%)	1 (0.44%)	0.202	Mutant group
CDH15	2 (2.15%)	1 (0.44%)	0.202	Mutant group
CHD2	2 (2.15%)	1 (0.44%)	0.202	Mutant group
DUS3L	2 (2.15%)	1 (0.44%)	0.202	Mutant group
EPAS1	2 (2.15%)	1 (0.44%)	0.202	Mutant group
FZD9	2 (2.15%)	1 (0.44%)	0.202	Mutant group
GALNT1	2 (2.15%)	1 (0.44%)	0.202	Mutant group
GALNT13	2 (2.15%)	1 (0.44%)	0.202	Mutant group
GRIPAP1	2 (2.15%)	1 (0.44%)	0.202	Mutant group
H3-5	2 (2.15%)	1 (0.44%)	0.202	Mutant group
HIPK3	2 (2.15%)	1 (0.44%)	0.202	Mutant group
IL17RA	2 (2.15%)	1 (0.44%)	0.202	Mutant group
IL1R1	2 (2.15%)	1 (0.44%)	0.202	Mutant group
KCNV1	2 (2.15%)	1 (0.44%)	0.202	Mutant group
LONRF3	2 (2.15%)	1 (0.44%)	0.202	Mutant group
MARVELD2	2 (2.15%)	1 (0.44%)	0.202	Mutant group
MCC	2 (2.15%)	1 (0.44%)	0.202	Mutant group
MCM7	2 (2.15%)	1 (0.44%)	0.202	Mutant group
MICAL3	2 (2.15%)	1 (0.44%)	0.202	Mutant group
MINAR1	2 (2.15%)	1 (0.44%)	0.202	Mutant group
MPDZ	2 (2.15%)	1 (0.44%)	0.202	Mutant group
MYLK	2 (2.15%)	1 (0.44%)	0.202	Mutant group
NPTX1	2 (2.15%)	1 (0.44%)	0.202	Mutant group
PANX2	2 (2.15%)	1 (0.44%)	0.202	Mutant group
PRAG1	2 (2.15%)	1 (0.44%)	0.202	Mutant group
PRSS55	2 (2.15%)	1 (0.44%)	0.202	Mutant group
RAD54L2	2 (2.15%)	1 (0.44%)	0.202	Mutant group
RASGRP2	2 (2.15%)	1 (0.44%)	0.202	Mutant group
RNF128	2 (2.15%)	1 (0.44%)	0.202	Mutant group
SEZ6	2 (2.15%)	1 (0.44%)	0.202	Mutant group
SSH1	2 (2.15%)	1 (0.44%)	0.202	Mutant group
TAF4	2 (2.15%)	1 (0.44%)	0.202	Mutant group
TLN2	2 (2.15%)	1 (0.44%)	0.202	Mutant group
TMEM156	2 (2.15%)	1 (0.44%)	0.202	Mutant group
TXNDC2	2 (2.15%)	1 (0.44%)	0.202	Mutant group
UGT2B10	2 (2.15%)	1 (0.44%)	0.202	Mutant group
ZNF280A	2 (2.15%)	1 (0.44%)	0.202	Mutant group
ZNF366	2 (2.15%)	1 (0.44%)	0.202	Mutant group
ZNFX1	2 (2.15%)	1 (0.44%)	0.202	Mutant group
CALCR	0 (0.00%)	9 (1.86%)	0.203	Non-mutant group
COL14A1	0 (0.00%)	9 (1.86%)	0.203	Non-mutant group
DYNC1I1	0 (0.00%)	9 (1.86%)	0.203	Non-mutant group
EXPH5	0 (0.00%)	9 (1.86%)	0.203	Non-mutant group
MYO15A	0 (0.00%)	9 (1.86%)	0.203	Non-mutant group
NOTCH2	0 (0.00%)	9 (1.86%)	0.203	Non-mutant group
SPTBN5	0 (0.00%)	9 (1.86%)	0.203	Non-mutant group
ACVR2A	1 (3.23%)	1 (0.39%)	0.205	Mutant group
AGO1	1 (3.23%)	1 (0.39%)	0.205	Mutant group
ALDH1B1	1 (3.23%)	1 (0.39%)	0.205	Mutant group
ANXA9	1 (3.23%)	1 (0.39%)	0.205	Mutant group
ASB17	1 (3.23%)	1 (0.39%)	0.205	Mutant group
ASMTL	1 (3.23%)	1 (0.39%)	0.205	Mutant group
B3GNT5	1 (3.23%)	1 (0.39%)	0.205	Mutant group
BPIFB4	1 (3.23%)	1 (0.39%)	0.205	Mutant group
BTNL8	1 (3.23%)	1 (0.39%)	0.205	Mutant group
CCDC88B	1 (3.23%)	1 (0.39%)	0.205	Mutant group
CCT7	1 (3.23%)	1 (0.39%)	0.205	Mutant group
COP1	1 (3.23%)	1 (0.39%)	0.205	Mutant group
CR1	1 (3.23%)	1 (0.39%)	0.205	Mutant group
CUL4B	1 (3.23%)	1 (0.39%)	0.205	Mutant group
EFCAB3	1 (3.23%)	1 (0.39%)	0.205	Mutant group
EID2B	1 (3.23%)	1 (0.39%)	0.205	Mutant group
EPC2	1 (3.23%)	1 (0.39%)	0.205	Mutant group
EXOC4	1 (3.23%)	1 (0.39%)	0.205	Mutant group
FANCB	1 (3.23%)	1 (0.39%)	0.205	Mutant group
FASTKD1	1 (3.23%)	1 (0.39%)	0.205	Mutant group
FBXL18	1 (3.23%)	1 (0.39%)	0.205	Mutant group
GPATCH2L	1 (3.23%)	1 (0.39%)	0.205	Mutant group
GSDMD	1 (3.23%)	1 (0.39%)	0.205	Mutant group
HNRNPL	1 (3.23%)	1 (0.39%)	0.205	Mutant group
HOXA1	1 (3.23%)	1 (0.39%)	0.205	Mutant group
HS6ST2	1 (3.23%)	1 (0.39%)	0.205	Mutant group
HTR2B	1 (3.23%)	1 (0.39%)	0.205	Mutant group
HTRA4	1 (3.23%)	1 (0.39%)	0.205	Mutant group
INTS3	1 (3.23%)	1 (0.39%)	0.205	Mutant group
IREB2	1 (3.23%)	1 (0.39%)	0.205	Mutant group
ITGAL	1 (3.23%)	1 (0.39%)	0.205	Mutant group
KANK2	1 (3.23%)	1 (0.39%)	0.205	Mutant group
KDM3B	1 (3.23%)	1 (0.39%)	0.205	Mutant group
KDM4C	1 (3.23%)	1 (0.39%)	0.205	Mutant group
KIF13B	1 (3.23%)	1 (0.39%)	0.205	Mutant group
KRT83	1 (3.23%)	1 (0.39%)	0.205	Mutant group
KRTAP13-1	1 (3.23%)	1 (0.39%)	0.205	Mutant group
LMF2	1 (3.23%)	1 (0.39%)	0.205	Mutant group
MICALL1	1 (3.23%)	1 (0.39%)	0.205	Mutant group
NPAS3	1 (3.23%)	1 (0.39%)	0.205	Mutant group
NPY	1 (3.23%)	1 (0.39%)	0.205	Mutant group
NT5C	1 (3.23%)	1 (0.39%)	0.205	Mutant group
OLFML2A	1 (3.23%)	1 (0.39%)	0.205	Mutant group
OR4X1	1 (3.23%)	1 (0.39%)	0.205	Mutant group
PHB2	1 (3.23%)	1 (0.39%)	0.205	Mutant group
PI15	1 (3.23%)	1 (0.39%)	0.205	Mutant group
POU1F1	1 (3.23%)	1 (0.39%)	0.205	Mutant group
PPIP5K2	1 (3.23%)	1 (0.39%)	0.205	Mutant group
PPP6R2	1 (3.23%)	1 (0.39%)	0.205	Mutant group
PTCD1	1 (3.23%)	1 (0.39%)	0.205	Mutant group
PWWP2B	1 (3.23%)	1 (0.39%)	0.205	Mutant group
RBM41	1 (3.23%)	1 (0.39%)	0.205	Mutant group
RLF	1 (3.23%)	1 (0.39%)	0.205	Mutant group
RPUSD1	1 (3.23%)	1 (0.39%)	0.205	Mutant group
RSPH14	1 (3.23%)	1 (0.39%)	0.205	Mutant group
RTP5	1 (3.23%)	1 (0.39%)	0.205	Mutant group
SCRIB	1 (3.23%)	1 (0.39%)	0.205	Mutant group
SHROOM2	1 (3.23%)	1 (0.39%)	0.205	Mutant group
SLC36A1	1 (3.23%)	1 (0.39%)	0.205	Mutant group
SLITRK3	1 (3.23%)	1 (0.39%)	0.205	Mutant group
SPZ1	1 (3.23%)	1 (0.39%)	0.205	Mutant group
STAG3	1 (3.23%)	1 (0.39%)	0.205	Mutant group
TFRC	1 (3.23%)	1 (0.39%)	0.205	Mutant group
TMEM248	1 (3.23%)	1 (0.39%)	0.205	Mutant group
TSHZ1	1 (3.23%)	1 (0.39%)	0.205	Mutant group
TUBB4B	1 (3.23%)	1 (0.39%)	0.205	Mutant group
USP37	1 (3.23%)	1 (0.39%)	0.205	Mutant group
ZACN	1 (3.23%)	1 (0.39%)	0.205	Mutant group
ZNF138	1 (3.23%)	1 (0.39%)	0.205	Mutant group
ZNF691	1 (3.23%)	1 (0.39%)	0.205	Mutant group
EPPK1	3 (4.84%)	11 (2.28%)	0.206	Mutant group
HCN1	3 (4.84%)	11 (2.28%)	0.206	Mutant group
KMT2C	3 (4.84%)	11 (2.28%)	0.206	Mutant group
STAG2	3 (4.84%)	11 (2.28%)	0.206	Mutant group
COL6A3	5 (5.38%)	15 (3.11%)	0.208	Mutant group
HIVEP3	0 (0.00%)	5 (1.96%)	0.209	Non-mutant group
CACNA1E	3 (3.23%)	7 (1.45%)	0.209	Mutant group
COL22A1	3 (3.23%)	7 (1.45%)	0.209	Mutant group
MED12	3 (3.23%)	7 (1.45%)	0.209	Mutant group
RP1	3 (3.23%)	7 (1.45%)	0.209	Mutant group
DMD	4 (4.30%)	11 (2.28%)	0.212	Mutant group
FBN3	4 (4.30%)	11 (2.28%)	0.212	Mutant group
MYH2	4 (4.30%)	11 (2.28%)	0.212	Mutant group
TTN	13 (13.98%)	87 (18.01%)	0.217	Non-mutant group
ADAM7	1 (3.23%)	3 (0.62%)	0.221	Mutant group
AFP	1 (3.23%)	3 (0.62%)	0.221	Mutant group
AKAP4	1 (3.23%)	3 (0.62%)	0.221	Mutant group
AMOTL1	1 (3.23%)	3 (0.62%)	0.221	Mutant group
ASAP1	1 (3.23%)	3 (0.62%)	0.221	Mutant group
CCDC88A	1 (3.23%)	3 (0.62%)	0.221	Mutant group
CDH12	1 (3.23%)	3 (0.62%)	0.221	Mutant group
CDH8	1 (3.23%)	3 (0.62%)	0.221	Mutant group
CEP126	1 (3.23%)	3 (0.62%)	0.221	Mutant group
COL18A1	1 (3.23%)	3 (0.62%)	0.221	Mutant group
DDI1	1 (3.23%)	3 (0.62%)	0.221	Mutant group
EDAR	1 (3.23%)	3 (0.62%)	0.221	Mutant group
EIF4G3	1 (3.23%)	3 (0.62%)	0.221	Mutant group
FOXN1	1 (3.23%)	3 (0.62%)	0.221	Mutant group
FREM2	1 (3.23%)	3 (0.62%)	0.221	Mutant group
GK2	1 (3.23%)	3 (0.62%)	0.221	Mutant group
GRPR	1 (3.23%)	3 (0.62%)	0.221	Mutant group
JADE3	1 (3.23%)	3 (0.62%)	0.221	Mutant group
LRP6	1 (3.23%)	3 (0.62%)	0.221	Mutant group
MAP3K4	1 (3.23%)	3 (0.62%)	0.221	Mutant group
MAST2	1 (3.23%)	3 (0.62%)	0.221	Mutant group
NLRP13	1 (3.23%)	3 (0.62%)	0.221	Mutant group
OR5C1	1 (3.23%)	3 (0.62%)	0.221	Mutant group
PCDHA11	1 (3.23%)	3 (0.62%)	0.221	Mutant group
PRAMEF1	1 (3.23%)	3 (0.62%)	0.221	Mutant group
PRAMEF2	1 (3.23%)	3 (0.62%)	0.221	Mutant group
RUNX1T1	1 (3.23%)	3 (0.62%)	0.221	Mutant group
SPTBN4	1 (3.23%)	3 (0.62%)	0.221	Mutant group
TANGO6	1 (3.23%)	3 (0.62%)	0.221	Mutant group
TNN	1 (3.23%)	3 (0.62%)	0.221	Mutant group
TRIP12	1 (3.23%)	3 (0.62%)	0.221	Mutant group
TRPC3	1 (3.23%)	3 (0.62%)	0.221	Mutant group
VPS16	1 (3.23%)	3 (0.62%)	0.221	Mutant group
VSIG4	1 (3.23%)	3 (0.62%)	0.221	Mutant group
ABCG4	1 (3.23%)	1 (0.44%)	0.225	Mutant group
ACBD3	1 (3.23%)	1 (0.44%)	0.225	Mutant group
ACOT11	1 (3.23%)	1 (0.44%)	0.225	Mutant group
ACOT4	1 (3.23%)	1 (0.44%)	0.225	Mutant group
ACTRT3	1 (3.23%)	1 (0.44%)	0.225	Mutant group
ADGRE1	1 (3.23%)	1 (0.44%)	0.225	Mutant group
AKR1C1	1 (3.23%)	1 (0.44%)	0.225	Mutant group
ALDH1A3	1 (3.23%)	1 (0.44%)	0.225	Mutant group
ANAPC7	1 (3.23%)	1 (0.44%)	0.225	Mutant group
ANKRD34A	1 (3.23%)	1 (0.44%)	0.225	Mutant group
ANKRD44	1 (3.23%)	1 (0.44%)	0.225	Mutant group
AP4B1	1 (3.23%)	1 (0.44%)	0.225	Mutant group
ARHGAP26	1 (3.23%)	1 (0.44%)	0.225	Mutant group
ARHGEF12	1 (3.23%)	1 (0.44%)	0.225	Mutant group
ARL13B	1 (3.23%)	1 (0.44%)	0.225	Mutant group
ARSG	1 (3.23%)	1 (0.44%)	0.225	Mutant group
ASMT	1 (3.23%)	1 (0.44%)	0.225	Mutant group
BFSP1	1 (3.23%)	1 (0.44%)	0.225	Mutant group
C6	1 (3.23%)	1 (0.44%)	0.225	Mutant group
CCDC66	1 (3.23%)	1 (0.44%)	0.225	Mutant group
CCDC91	1 (3.23%)	1 (0.44%)	0.225	Mutant group
CCNE2	1 (3.23%)	1 (0.44%)	0.225	Mutant group
CD28	1 (3.23%)	1 (0.44%)	0.225	Mutant group
CD2AP	1 (3.23%)	1 (0.44%)	0.225	Mutant group
CD58	1 (3.23%)	1 (0.44%)	0.225	Mutant group
CHST1	1 (3.23%)	1 (0.44%)	0.225	Mutant group
CLIC4	1 (3.23%)	1 (0.44%)	0.225	Mutant group
CORO2A	1 (3.23%)	1 (0.44%)	0.225	Mutant group
CRB2	1 (3.23%)	1 (0.44%)	0.225	Mutant group
CSAG1	1 (3.23%)	1 (0.44%)	0.225	Mutant group
CYP2C18	1 (3.23%)	1 (0.44%)	0.225	Mutant group
DBT	1 (3.23%)	1 (0.44%)	0.225	Mutant group
DIP2A	1 (3.23%)	1 (0.44%)	0.225	Mutant group
DISP1	1 (3.23%)	1 (0.44%)	0.225	Mutant group
DNHD1	1 (3.23%)	1 (0.44%)	0.225	Mutant group
DOT1L	1 (3.23%)	1 (0.44%)	0.225	Mutant group
DPEP3	1 (3.23%)	1 (0.44%)	0.225	Mutant group
DRC1	1 (3.23%)	1 (0.44%)	0.225	Mutant group
ECT2	1 (3.23%)	1 (0.44%)	0.225	Mutant group
EDA	1 (3.23%)	1 (0.44%)	0.225	Mutant group
ERBB2	1 (3.23%)	1 (0.44%)	0.225	Mutant group
EXT2	1 (3.23%)	1 (0.44%)	0.225	Mutant group
FAN1	1 (3.23%)	1 (0.44%)	0.225	Mutant group
FIP1L1	1 (3.23%)	1 (0.44%)	0.225	Mutant group
FKBP6	1 (3.23%)	1 (0.44%)	0.225	Mutant group
FKBP9	1 (3.23%)	1 (0.44%)	0.225	Mutant group
GARRE1	1 (3.23%)	1 (0.44%)	0.225	Mutant group
GJC3	1 (3.23%)	1 (0.44%)	0.225	Mutant group
GNRHR	1 (3.23%)	1 (0.44%)	0.225	Mutant group
GPR35	1 (3.23%)	1 (0.44%)	0.225	Mutant group
GTF2H4	1 (3.23%)	1 (0.44%)	0.225	Mutant group
IFRD2	1 (3.23%)	1 (0.44%)	0.225	Mutant group
ITGA2B	1 (3.23%)	1 (0.44%)	0.225	Mutant group
ITPRIPL2	1 (3.23%)	1 (0.44%)	0.225	Mutant group
JMJD6	1 (3.23%)	1 (0.44%)	0.225	Mutant group
KCNJ8	1 (3.23%)	1 (0.44%)	0.225	Mutant group
KCNN1	1 (3.23%)	1 (0.44%)	0.225	Mutant group
KCTD10	1 (3.23%)	1 (0.44%)	0.225	Mutant group
KIF27	1 (3.23%)	1 (0.44%)	0.225	Mutant group
KIF3A	1 (3.23%)	1 (0.44%)	0.225	Mutant group
KLHL41	1 (3.23%)	1 (0.44%)	0.225	Mutant group
KRT31	1 (3.23%)	1 (0.44%)	0.225	Mutant group
LAMC2	1 (3.23%)	1 (0.44%)	0.225	Mutant group
LMX1A	1 (3.23%)	1 (0.44%)	0.225	Mutant group
LPCAT2	1 (3.23%)	1 (0.44%)	0.225	Mutant group
MAGEA8	1 (3.23%)	1 (0.44%)	0.225	Mutant group
MARF1	1 (3.23%)	1 (0.44%)	0.225	Mutant group
MCCC1	1 (3.23%)	1 (0.44%)	0.225	Mutant group
MFNG	1 (3.23%)	1 (0.44%)	0.225	Mutant group
MLLT6	1 (3.23%)	1 (0.44%)	0.225	Mutant group
[truncated: 7,971 more rows]

## Sheet: Table S2
Table S2. The CNA frequency of MPERGs. Related to Figure 2E.
CNA frequency (%)	Amplification	Deep deletion
STIM1	0.28	2.57
SYBU	2.66	0.09
CTTNBP2	2.57	0
SLAIN2	2.39	0.09
APC2	2.11	0.09
PPP1R13L	0.18	1.74
CLIP2	1.56	0.28
AMER2	0.18	1.1
CLIP1	0.83	0.37
TACC3	1.1	0.09
CLIP3	0.73	0.37
SLAIN1	0.28	0.83
NAV2	0.18	0.73
NAV3	0.37	0.55
FBXW11	0.28	0.55
NCKAP5L	0.09	0.73
KNSTRN	0.09	0.64
TTBK2	0.09	0.64
APC	0	0.55
CDK5RAP2	0.55	0
CLASP2	0.28	0.37
KIF18A	0.18	0.37
MAPRE2	0.55	0
TTBK1	0.64	0
CEP104	0	0.46
DST	0.46	0
GAS2L1	0.37	0.09
SRCIN1	0.09	0.37
GAS2L2	0.18	0.18
KIF11	0.09	0.28
NAV1	0.37	0
SPAG5	0.09	0.28
KIF2C	0.18	0.09
MACF1	0.18	0.09
PAFAH1B1	0.18	0.09
PSRC1	0.28	0.28
TRIO	0	0.28
CKAP5	0	0.18
CLIP4	0.18	0
KIF18B	0	0.18
MAPRE3	0.09	0
NCKAP5	0.09	0
CLASP1
DCTN1
FILIP1
MAPRE1

## Sheet: Table S3
Table S3. Correlations between MPERG expression and CNA, DNA methylation in LGG and GBM from cBioPortal (TCGA, Firehose). Related to Figure 3A.
	CNA		Methylation
	Correlation	p	Correlation	p
STIM1	0.34	9.66e-20	-0.11	0.005658
SYBU	0.07	0.0699	0	1
CTTNBP2	-0.23	1.44e-09	-0.46	4.35e-32
SLAIN2	0.29	1.77e-14	-0.11	0.0137
APC2	0.21	2.54e-08	-0.52	1.09e-42
PPP1R13L	0.45	1.03e-33	-0.28	4.33e-12
CLIP2	0.21	8.55e-08	-0.12	0.003992
AMER2	0.16	3.134e-05	0.02	0.547
CLIP1	0.09	0.0181	-0.16	0.0001079
TACC3	0.21	3.13e-08	-0.4	4.21e-24
CLIP3	0.03	0.458	-0.49	5.46e-37
SLAIN1	0.16	4.141e-05	-0.59	4.02e-57
NAV2	0.23	2.34e-09	-0.2	5.88e-07
NAV3	0.1	0.0102	0.01	0.747
FBXW11	0.05	0.207	-0.11	0.0128
NCKAP5L	0.16	4.577e-05	-0.41	2.61e-23
KNSTRN	0.06	0.158	-0.16	0.0003343
TTBK2	0.15	0.0001853	-0.17	0.0001156
APC	0.06	0.132	-0.41	2.4e-25
CDK5RAP2	0.19	8.37e-07	-0.02	0.657
CLASP2	0.15	0.0001132	-0.02	0.578
KIF18A	-0.1	0.0113	-0.06	0.147
MAPRE2	0.01	0.707	-0.36	1.75e-19
TTBK1	0.18	1.713e-06	-0.26	1.27e-09
CEP104	0.52	2.69e-47	-0.42	2.5e-26
DST	0.2	3.36e-07	-0.35	4.53e-19
GAS2L1	0.25	1.09e-10	0.05	0.251
SRCIN1	0.24	2.05e-10	-0.58	1.67e-48
GAS2L2	-0.06	0.114	-0.38	1.4e-21
KIF11	-0.35	5.62e-20	-0.33	2.13e-16
NAV1	0.1	0.009014	-0.29	7.46e-13
SPAG5	-0.03	0.423	-0.34	2.06e-17
KIF2C	0.52	2.53e-47	-0.51	4.11e-40
MACF1	0.05	0.173	-0.13	0.00107
PAFAH1B1	0.3	4.5e-15	0.06	0.176
PSRC1	0.55	1.72e-54	-0.72	5.62e-97
TRIO	0.17	1.333e-05	-0.3	7.28e-14
CKAP5	0.29	6.88e-14	-0.33	7e-17
CLIP4	0.02	0.637	-0.18	1.012e-05
KIF18B	0.03	0.398	-0.12	0.004062
MAPRE3	-0.01	0.843	-0.13	0.001317
NCKAP5	0.08	0.0425	-0.28	3.4e-11
CLASP1	0	1	-0.15	0.0003523
DCTN1	0	1	-0.48	1.22e-35
FILIP1	0	1	-0.12	0.003817
MAPRE1	0	1	-0.14	0.0005749
p < 0.05 indicated a significant difference.

## Sheet: Table S4
Table S4. Correlations among MPERGs from TCGA database. Related to Figure 3D.
	AMER2		APC	APC	APC2	APC2	CDK5RAP2	CDK5RAP2	CEP104	CEP104	CKAP5	CKAP5	CLASP1	CLASP1	CLASP2	CLASP2	CLIP1	CLIP1	CLIP2	CLIP2	CLIP3	CLIP3	CLIP4	CLIP4	CTTNBP2	CTTNBP2	DCTN1	DCTN1	DST	DST	FBXW11	FBXW11	FILIP1	FILIP1	GAS2L1	GAS2L1	GAS2L2	GAS2L2	KIF11	KIF11	KIF18A	KIF18A	KIF18B	KIF18B	KIF2C	KIF2C	KNSTRN	KNSTRN	MACF1
	Correlation	p	Correlation	p	Correlation	p	Correlation	p	Correlation	p	Correlation	p	Correlation	p	Correlation	p	Correlation	p	Correlation	p	Correlation	p	Correlation	p	Correlation	p	Correlation	p	Correlation	p	Correlation	p	Correlation	p	Correlation	p	Correlation	p	Correlation	p	Correlation	p	Correlation	p	Correlation	p	Correlation	p	Correlation
AMER2	1	0	0.53347	0	0.583525	0	0.238501	4.04314e-10	0.120114	0.00184232	0.378125	0	0.467382	0	0.666974	0	0.0325603	0.400095	0.170813	8.75497e-06	0.370945	0	0.629305	0	0.588456	0	0.47552	0	0.663925	0	0.560078	0	0.130643	0.000699324	0.258278	1.13403e-11	-0.0813604	0.035246	-0.302465	1.33227e-15	-0.49852	0	-0.253707	2.66249e-11	-0.567018	0	-0.347167	0	0.345165
APC	0.53347	0	1	0	0.397576	0	0.337306	0	0.381659	0	0.677382	0	0.630459	0	0.643507	0	0.555999	0	0.354509	0	0.446109	0	0.592671	0	0.444286	0	0.598139	0	0.659731	0	0.77013	0	0.396949	0	0.122931	0.00143183	0.0932407	0.0157684	0.00632415	0.870209	-0.162296	2.43114e-05	-0.0777234	0.0443142	-0.263387	4.28191e-12	-0.060354	0.118588	0.626286
APC2	0.583525	0	0.397576	0	1	0	0.361253	0	0.0917194	0.0175645	0.401754	0	0.516314	0	0.526512	0	0.0448467	0.246357	0.438428	0	0.433492	0	0.437217	0	0.617352	0	0.430101	0	0.586107	0	0.415547	0	0.025962	0.502305	0.4552	0	-0.120213	0.00182609	-0.0648669	0.0934113	-0.284536	6.03961e-14	0.0535312	0.16635	-0.313253	0	-0.135692	0.000428251	0.303685
CDK5RAP2	0.238501	4.04314e-10	0.337306	0	0.361253	0	1	0	0.518178	0	0.510983	0	0.466671	0	0.303072	1.11022e-15	0.368907	0	0.475321	0	0.241143	2.55303e-10	0.226782	2.90887e-09	0.338245	0	0.245324	1.22003e-10	0.503509	0	0.390313	0	0.198922	2.08809e-07	0.136924	0.000378947	0.00151246	0.96883	0.38693	0	0.254662	2.23079e-11	0.367861	0	0.264884	3.20588e-12	0.257735	1.25597e-11	0.539207
CEP104	0.120114	0.00184232	0.381659	0	0.0917194	0.0175645	0.518178	0	1	0	0.429513	0	0.417179	0	0.23839	4.12119e-10	0.506443	0	0.38889	0	0.322389	0	0.196753	2.84305e-07	0.148101	0.000119288	0.227071	2.77428e-09	0.376568	0	0.401522	0	0.355439	0	-0.00440235	0.909444	0.202582	1.23092e-07	0.248306	7.14437e-11	0.270283	1.11178e-12	0.195809	3.24784e-07	0.276014	3.51941e-13	0.185145	1.39881e-06	0.697197
CKAP5	0.378125	0	0.677382	0	0.401754	0	0.510983	0	0.429513	0	1	0	0.70391	0	0.577339	0	0.497729	0	0.505826	0	0.392171	0	0.405291	0	0.477143	0	0.531964	0	0.514965	0	0.755132	0	0.358084	0	0.0996818	0.00982821	-0.0368719	0.340617	0.388764	0	0.202914	1.17272e-07	0.28221	9.85878e-14	0.0952702	0.0136243	0.29511	6.21725e-15	0.522046
CLASP1	0.467382	0	0.630459	0	0.516314	0	0.466671	0	0.417179	0	0.70391	0	1	0	0.683196	0	0.396994	0	0.429594	0	0.582934	0	0.504059	0	0.632816	0	0.568078	0	0.6626	0	0.696646	0	0.286083	4.35207e-14	0.153641	6.51831e-05	-0.141788	0.000231543	0.216763	1.44623e-08	-0.0313851	0.417328	0.191791	5.68523e-07	-0.0639955	0.0979069	0.111095	0.00398707	0.613203
CLASP2	0.666974	0	0.643507	0	0.526512	0	0.303072	1.11022e-15	0.23839	4.12119e-10	0.577339	0	0.683196	0	1	0	0.131785	0.00062685	0.290932	1.55431e-14	0.539129	0	0.652178	0	0.78908	0	0.63722	0	0.731164	0	0.757147	0	0.245076	1.27519e-10	0.0505276	0.191462	-0.228553	2.17353e-09	0.0176643	0.648095	-0.295809	5.32907e-15	-0.00416153	0.914378	-0.339112	0	-0.0702247	0.0692831	0.411134
CLIP1	0.0325603	0.400095	0.555999	0	0.0448467	0.246357	0.368907	0	0.506443	0	0.497729	0	0.396994	0	0.131785	0.00062685	1	0	0.306054	4.44089e-16	0.123589	0.00134898	0.264913	3.18767e-12	0.00222668	0.954124	0.259659	8.73301e-12	0.363415	0	0.41994	0	0.427	0	0.0929275	0.0161245	0.203018	1.15508e-07	0.175499	4.88393e-06	0.186069	1.23655e-06	0.0733611	0.0577071	0.113982	0.00313209	0.177919	3.59123e-06	0.623443
CLIP2	0.170813	8.75497e-06	0.354509	0	0.438428	0	0.475321	0	0.38889	0	0.505826	0	0.429594	0	0.290932	1.55431e-14	0.306054	4.44089e-16	1	0	0.31633	0	0.109322	0.00461229	0.366761	0	0.327884	0	0.331285	0	0.391444	0	0.145703	0.000153951	0.276256	3.35065e-13	0.035461	0.359426	0.289721	1.9984e-14	0.16049	2.99951e-05	0.390003	0	0.166736	1.43648e-05	0.194548	3.87683e-07	0.410928
CLIP3	0.370945	0	0.446109	0	0.433492	0	0.241143	2.55303e-10	0.322389	0	0.392171	0	0.582934	0	0.539129	0	0.123589	0.00134898	0.31633	0	1	0	0.325637	0	0.486475	0	0.536609	0	0.462567	0	0.452796	0	0.162581	2.35126e-05	0.161907	2.5442e-05	-0.0305882	0.429257	-0.0706277	0.0676967	-0.239421	3.44716e-10	-0.0398884	0.302556	-0.172538	7.07466e-06	-0.0857546	0.0264427	0.459381
CLIP4	0.629305	0	0.592671	0	0.437217	0	0.226782	2.90887e-09	0.196753	2.84305e-07	0.405291	0	0.504059	0	0.652178	0	0.264913	3.18767e-12	0.109322	0.00461229	0.325637	0	1	0	0.522938	0	0.587152	0	0.645254	0	0.601604	0	0.234373	8.20023e-10	0.161175	2.77042e-05	-0.0320472	0.407566	-0.25229	3.45737e-11	-0.416015	0	-0.244695	1.36463e-10	-0.519846	0	-0.252612	3.25833e-11	0.356005
CTTNBP2	0.588456	0	0.444286	0	0.617352	0	0.338245	0	0.148101	0.000119288	0.477143	0	0.632816	0	0.78908	0	0.00222668	0.954124	0.366761	0	0.486475	0	0.522938	0	1	0	0.503352	0	0.695021	0	0.585371	0	0.128089	0.000890529	0.0894189	0.0206202	-0.311519	0	0.075453	0.0509157	-0.273835	5.46674e-13	0.158414	3.80817e-05	-0.26835	1.62892e-12	-0.0949256	0.0139693	0.351138
DCTN1	0.47552	0	0.598139	0	0.430101	0	0.245324	1.22003e-10	0.227071	2.77428e-09	0.531964	0	0.568078	0	0.63722	0	0.259659	8.73301e-12	0.327884	0	0.536609	0	0.587152	0	0.503352	0	1	0	0.504174	0	0.575975	0	0.237164	5.09063e-10	0.121059	0.00169393	-0.072997	0.0589624	-0.031808	0.411077	-0.288421	2.66454e-14	-0.0146067	0.705877	-0.30481	6.66134e-16	-0.0419585	0.278135	0.328303
DST	0.663925	0	0.659731	0	0.586107	0	0.503509	0	0.376568	0	0.514965	0	0.6626	0	0.731164	0	0.363415	0	0.331285	0	0.462567	0	0.645254	0	0.695021	0	0.504174	0	1	0	0.644192	0	0.248547	6.84042e-11	0.218096	1.17356e-08	-0.155563	5.25968e-05	-0.0945424	0.0143618	-0.326017	0	-0.0812527	0.0354898	-0.366693	0	-0.192183	5.38554e-07	0.713875
FBXW11	0.560078	0	0.77013	0	0.415547	0	0.390313	0	0.401522	0	0.755132	0	0.696646	0	0.757147	0	0.41994	0	0.391444	0	0.452796	0	0.601604	0	0.585371	0	0.575975	0	0.644192	0	1	0	0.381017	0	0.125039	0.00118172	-0.0880516	0.0226474	0.117633	0.00229015	-0.102185	0.00812122	0.0469915	0.224464	-0.19623	3.06079e-07	0.0513326	0.184474	0.526125
FILIP1	0.130643	0.000699324	0.396949	0	0.025962	0.502305	0.198922	2.08809e-07	0.355439	0	0.358084	0	0.286083	4.35207e-14	0.245076	1.27519e-10	0.427	0	0.145703	0.000153951	0.162581	2.35126e-05	0.234373	8.20023e-10	0.128089	0.000890529	0.237164	5.09063e-10	0.248547	6.84042e-11	0.381017	0	1	0	-0.0805139	0.0372017	0.222726	5.61897e-09	0.150481	9.2251e-05	0.127666	0.000926478	0.0547178	0.157142	0.0524154	0.175374	0.110252	0.00427405	0.317736
GAS2L1	0.258278	1.13403e-11	0.122931	0.00143183	0.4552	0	0.136924	0.000378947	-0.00440235	0.909444	0.0996818	0.00982821	0.153641	6.51831e-05	0.0505276	0.191462	0.0929275	0.0161245	0.276256	3.35065e-13	0.161907	2.5442e-05	0.161175	2.77042e-05	0.0894189	0.0206202	0.121059	0.00169393	0.218096	1.17356e-08	0.125039	0.00118172	-0.0805139	0.0372017	1	0	0.113264	0.00332736	-0.17963	2.8821e-06	-0.206696	6.71564e-08	-0.0724064	0.0610473	-0.188298	9.16156e-07	-0.158977	3.57061e-05	0.146642
GAS2L2	-0.0813604	0.035246	0.0932407	0.0157684	-0.120213	0.00182609	0.00151246	0.96883	0.202582	1.23092e-07	-0.0368719	0.340617	-0.141788	0.000231543	-0.228553	2.17353e-09	0.203018	1.15508e-07	0.035461	0.359426	-0.0305882	0.429257	-0.0320472	0.407566	-0.311519	0	-0.072997	0.0589624	-0.155563	5.25968e-05	-0.0880516	0.0226474	0.222726	5.61897e-09	0.113264	0.00332736	1	0	-0.0802394	0.0378555	0.0960549	0.012867	-0.0444575	0.250484	0.0833342	0.031023	-0.0291002	0.452055	0.101885
KIF11	-0.302465	1.33227e-15	0.00632415	0.870209	-0.0648669	0.0934113	0.38693	0	0.248306	7.14437e-11	0.388764	0	0.216763	1.44623e-08	0.0176643	0.648095	0.175499	4.88393e-06	0.289721	1.9984e-14	-0.0706277	0.0676967	-0.25229	3.45737e-11	0.075453	0.0509157	-0.031808	0.411077	-0.0945424	0.0143618	0.117633	0.00229015	0.150481	9.2251e-05	-0.17963	2.8821e-06	-0.0802394	0.0378555	1	0	0.825895	0	0.811474	0	0.834839	0	0.765534	0	0.0846367
KIF18A	-0.49852	0	-0.162296	2.43114e-05	-0.284536	6.03961e-14	0.254662	2.23079e-11	0.270283	1.11178e-12	0.202914	1.17272e-07	-0.0313851	0.417328	-0.295809	5.32907e-15	0.186069	1.23655e-06	0.16049	2.99951e-05	-0.239421	3.44716e-10	-0.416015	0	-0.273835	5.46674e-13	-0.288421	2.66454e-14	-0.326017	0	-0.102185	0.00812122	0.127666	0.000926478	-0.206696	6.71564e-08	0.0960549	0.012867	0.825895	0	1	0	0.668951	0	0.913804	0	0.734185	0	0.0119977
KIF18B	-0.253707	2.66249e-11	-0.0777234	0.0443142	0.0535312	0.16635	0.367861	0	0.195809	3.24784e-07	0.28221	9.85878e-14	0.191791	5.68523e-07	-0.00416153	0.914378	0.0733611	0.0577071	0.390003	0	-0.0398884	0.302556	-0.244695	1.36463e-10	0.158414	3.80817e-05	-0.0146067	0.705877	-0.0812527	0.0354898	0.0469915	0.224464	0.0547178	0.157142	-0.0724064	0.0610473	-0.0444575	0.250484	0.811474	0	0.668951	0	1	0	0.711515	0	0.653285	0	0.0496883
KIF2C	-0.567018	0	-0.263387	4.28191e-12	-0.313253	0	0.264884	3.20588e-12	0.276014	3.51941e-13	0.0952702	0.0136243	-0.0639955	0.0979069	-0.339112	0	0.113982	0.00313209	0.166736	1.43648e-05	-0.172538	7.07466e-06	-0.519846	0	-0.26835	1.62892e-12	-0.30481	6.66134e-16	-0.366693	0	-0.19623	3.06079e-07	0.0524154	0.175374	-0.188298	9.16156e-07	0.0833342	0.031023	0.834839	0	0.913804	0	0.711515	0	1	0	0.729379	0	0.0170787
KNSTRN	-0.347167	0	-0.060354	0.118588	-0.135692	0.000428251	0.257735	1.25597e-11	0.185145	1.39881e-06	0.29511	6.21725e-15	0.111095	0.00398707	-0.0702247	0.0692831	0.177919	3.59123e-06	0.194548	3.87683e-07	-0.0857546	0.0264427	-0.252612	3.25833e-11	-0.0949256	0.0139693	-0.0419585	0.278135	-0.192183	5.38554e-07	0.0513326	0.184474	0.110252	0.00427405	-0.158977	3.57061e-05	-0.0291002	0.452055	0.765534	0	0.734185	0	0.653285	0	0.729379	0	1	0	-0.000436511
MACF1	0.345165	0	0.626286	0	0.303685	8.88178e-16	0.539207	0	0.697197	0	0.522046	0	0.613203	0	0.411134	0	0.623443	0	0.410928	0	0.459381	0	0.356005	0	0.351138	0	0.328303	0	0.713875	0	0.526125	0	0.317736	0	0.146642	0.00013939	0.101885	0.00831062	0.0846367	0.0284802	0.0119977	0.756572	0.0496883	0.198952	0.0170787	0.659013	-0.000436511	0.991002	1
MAPRE1	0.0240619	0.534103	0.245151	1.25837e-10	0.212675	2.72288e-08	0.485926	0	0.283081	8.21565e-14	0.49919	0	0.382116	0	0.24106	2.59039e-10	0.320819	0	0.388304	0	0.0252321	0.5144	0.0450252	0.24448	0.217807	1.22806e-08	0.118858	0.0020578	0.216716	1.45705e-08	0.387762	0	0.155261	5.44136e-05	-0.0194579	0.615131	-0.208234	5.33806e-08	0.539481	0	0.422587	0	0.464657	0	0.362734	0	0.469059	0	0.217534
MAPRE2	0.566141	0	0.70888	0	0.280378	1.43885e-13	0.259802	8.49854e-12	0.363711	0	0.568343	0	0.524771	0	0.618647	0	0.433943	0	0.294582	7.10543e-15	0.444789	0	0.573272	0	0.412386	0	0.674046	0	0.553291	0	0.697889	0	0.326841	0	0.0684011	0.0768464	0.0209294	0.588651	-0.0870884	0.0241771	-0.268513	1.5774e-12	-0.13682	0.000382905	-0.331204	0	-0.0647561	0.093974	0.479062
MAPRE3	0.279652	1.672e-13	0.338993	0	0.260086	8.05334e-12	-0.0839414	0.0298144	-0.0620289	0.108686	0.209806	4.21298e-08	0.248483	6.92042e-11	0.382476	0	0.0380662	0.325196	0.0182062	0.638059	0.32297	0	0.486523	0	0.270539	1.05671e-12	0.624721	0	0.202857	1.1825e-07	0.299401	2.44249e-15	0.118939	0.0020433	0.0561548	0.146512	0.148079	0.000119571	-0.171039	8.51459e-06	-0.294634	6.88338e-15	-0.087986	0.0227489	-0.333883	0	-0.125924	0.00108926	0.0154347
NAV1	0.556383	0	0.572818	0	0.578708	0	0.419545	0	0.234128	8.54886e-10	0.591887	0	0.659506	0	0.692835	0	0.247352	8.48526e-11	0.451715	0	0.367498	0	0.442166	0	0.690467	0	0.558759	0	0.671851	0	0.609391	0	0.156848	4.55049e-05	0.147766	0.000123646	-0.24855	6.83669e-11	0.195771	3.26538e-07	-0.13571	0.000427478	0.2359	6.32268e-10	-0.17781	3.64172e-06	0.073014	0.0589036	0.445838
NAV2	0.428535	0	0.473501	0	0.501998	0	0.541625	0	0.395471	0	0.508871	0	0.587291	0	0.446172	0	0.427524	0	0.369599	0	0.312026	0	0.413566	0	0.454696	0	0.277112	2.81553e-13	0.660926	0	0.484669	0	0.122002	0.0015569	0.25642	1.60747e-11	-0.12266	0.0014674	0.0634225	0.100956	-0.0573295	0.138237	0.112053	0.00368243	-0.105881	0.00608344	-0.023853	0.537661	0.591498
NAV3	0.491352	0	0.666183	0	0.224885	3.96394e-09	0.113669	0.00321593	0.26204	5.54623e-12	0.370361	0	0.305898	4.44089e-16	0.430281	0	0.378022	0	0.112215	0.00363305	0.261024	6.73617e-12	0.527244	0	0.213353	2.45374e-08	0.502941	0	0.43236	0	0.4905	0	0.339829	0	0.0793926	0.0399339	0.298161	3.10862e-15	-0.213139	2.53561e-08	-0.269692	1.25011e-12	-0.232359	1.15245e-09	-0.374471	0	-0.208013	5.51755e-08	0.416416
NCKAP5	0.424959	0	0.518593	0	0.374923	0	0.517502	0	0.53139	0	0.450995	0	0.535088	0	0.538686	0	0.298212	3.10862e-15	0.453909	0	0.421285	0	0.347514	0	0.529495	0	0.329705	0	0.626799	0	0.510607	0	0.222839	5.51769e-09	0.113374	0.00329674	-0.051619	0.182034	0.106647	0.00572343	-0.00973049	0.801502	0.108971	0.00474597	-0.00939128	0.808285	-0.0398044	0.303576	0.61339
NCKAP5L	0.200224	1.73204e-07	0.147261	0.000130496	0.562565	0	0.502616	0	0.322263	0	0.350065	0	0.479557	0	0.352339	0	0.157433	4.25863e-05	0.505769	0	0.252152	3.5461e-11	0.170939	8.62031e-06	0.521795	0	0.250111	5.15037e-11	0.420408	0	0.24058	2.81719e-10	0.0258951	0.503408	0.175238	5.04745e-06	-0.096333	0.0126075	0.326446	0	0.152871	7.09872e-05	0.486018	0	0.145377	0.000159344	0.18115	2.36654e-06	0.350212
PAFAH1B1	0.557545	0	0.79514	0	0.468675	0	0.355319	0	0.342822	0	0.736704	0	0.755126	0	0.786587	0	0.436401	0	0.40321	0	0.546936	0	0.638464	0	0.603027	0	0.732899	0	0.644177	0	0.829982	0	0.383052	0	0.112514	0.00354354	-0.0320959	0.406852	0.115143	0.00283803	-0.155949	5.03643e-05	0.0581163	0.1329	-0.220629	7.8594e-09	0.0767956	0.0469192	0.529543
PPP1R13L	-0.164361	1.90663e-05	-0.150624	9.08284e-05	0.0423999	0.273106	0.21971	9.09445e-09	0.246693	9.55094e-11	-0.108296	0.00501321	-0.123962	0.001304	-0.29764	3.55271e-15	0.148256	0.000117329	0.0604023	0.118292	0.0251611	0.515585	-0.163329	2.1538e-05	-0.2488	6.5342e-11	-0.324142	0	0.00272972	0.943776	-0.165554	1.65469e-05	0.0549189	0.15562	0.139568	0.000290485	0.217076	1.37719e-08	-0.0556942	0.149858	0.182372	2.01752e-06	-0.0508321	0.188796	0.187344	1.04207e-06	-0.0716555	0.0637855	0.188335
PSRC1	-0.537119	0	-0.304316	8.88178e-16	-0.468144	0	0.014935	0.699583	0.222229	6.08608e-09	-0.158016	3.98511e-05	-0.342737	0	-0.539655	0	0.138066	0.000338046	0.00710892	0.854274	-0.311877	0	-0.439869	0	-0.605368	0	-0.266518	2.33236e-12	-0.487797	0	-0.350152	0	0.0290012	0.453597	-0.173503	6.27447e-06	0.306935	4.44089e-16	0.347337	0	0.603071	0	0.325842	0	0.619926	0	0.456615	0	-0.0872867
SLAIN1	0.596944	0	0.248844	6.48255e-11	0.360568	0	0.117632	0.00229045	-0.0526938	0.173089	0.320018	0	0.259973	8.22808e-12	0.528744	0	-0.0832266	0.0312415	0.192686	5.02349e-07	0.0475691	0.218812	0.423888	0	0.49141	0	0.437393	0	0.374901	0	0.411186	0	0.00894529	0.817225	0.0152605	0.693364	-0.255178	2.02665e-11	0.00426047	0.912351	-0.222848	5.50987e-09	0.0625967	0.105482	-0.317241	0	-0.0494867	0.200783	-0.0106522
SLAIN2	-0.225417	3.6357e-09	0.200811	1.59161e-07	-0.113804	0.00317954	0.410795	0	0.534965	0	0.420603	0	0.345153	0	0.0174337	0.652385	0.550778	0	0.233861	8.94405e-10	-0.0338736	0.381351	0.0229531	0.553118	-0.0275345	0.476764	-0.0326575	0.398689	0.0908116	0.0187195	0.283665	7.26086e-14	0.324917	0	-0.146547	0.000140797	0.00991348	0.79785	0.565505	0	0.606807	0	0.433986	0	0.545677	0	0.501461	0	0.374223
SPAG5	-0.315099	0	-0.0529914	0.170672	-0.0471711	0.222695	0.284711	5.81757e-14	0.141378	0.000241511	0.278448	2.14051e-13	0.0999511	0.0096304	-0.105027	0.00650837	0.152332	7.5337e-05	0.224452	4.2526e-09	-0.131894	0.000620315	-0.262835	4.76152e-12	-0.0655423	0.0900421	-0.0199141	0.606867	-0.169365	1.04525e-05	-0.0126065	0.744639	0.13741	0.000361005	-0.0810158	0.0360313	0.0965649	0.0123948	0.832558	0	0.748315	0	0.786971	0	0.763297	0	0.712548	0	-0.00164632
SRCIN1	0.476918	0	0.340051	0	0.265361	2.92255e-12	0.0249698	0.518785	0.0555733	0.150745	0.195645	3.32363e-07	0.159612	3.31918e-05	0.446346	0	-0.0567982	0.141934	0.105889	0.00607951	0.269152	1.39067e-12	0.407608	0	0.323796	0	0.61373	0	0.289025	2.33147e-14	0.289887	1.95399e-14	0.0737192	0.0564939	-0.0313749	0.417479	0.0777505	0.0442401	-0.177328	3.87288e-06	-0.338438	0	-0.142206	0.000221788	-0.368711	0	-0.206189	7.24141e-08	0.0710645
STIM1	0.219319	9.67595e-09	0.436776	0	0.249958	5.29625e-11	0.0905212	0.0191027	0.227677	2.51131e-09	0.461023	0	0.379309	0	0.200383	1.69298e-07	0.393669	0	0.143943	0.000185193	0.224938	3.93021e-09	0.428109	0	0.0512512	0.185172	0.399685	0	0.228974	2.02723e-09	0.400194	0	0.254139	2.45812e-11	0.267529	1.91402e-12	0.1812	2.35141e-06	-0.0544739	0.159003	-0.0125171	0.74639	-0.0648843	0.0933237	-0.164614	1.85037e-05	-0.0153209	0.692212	0.259887
SYBU	0.568951	0	0.488788	0	0.394013	0	0.0265128	0.493278	0.00186013	0.96167	0.349642	0	0.398513	0	0.480686	0	0.144402	0.000176526	0.141012	0.000250735	0.331282	0	0.562581	0	0.401132	0	0.524183	0	0.436224	0	0.488335	0	0.146591	0.000140145	0.318636	0	0.0118182	0.760102	-0.249194	6.08411e-11	-0.395116	0	-0.225123	3.81361e-09	-0.453304	0	-0.250837	4.51195e-11	0.195743
TACC3	-0.513194	0	-0.271277	9.12603e-13	-0.213454	2.41571e-08	0.264448	3.48832e-12	0.182335	2.02722e-06	0.0931374	0.0158851	-0.08291	0.0318922	-0.347781	0	0.0985348	0.0107119	0.177617	3.7325e-06	-0.256095	1.70821e-11	-0.480339	0	-0.24108	2.58167e-10	-0.230177	1.66025e-09	-0.358693	0	-0.230807	1.49466e-09	0.036429	0.346453	-0.138292	0.000330462	0.0680487	0.0783825	0.832019	0	0.859607	0	0.742143	0	0.910306	0	0.717318	0	-0.0529978
TRIO	-0.0222349	0.565608	0.238796	3.84174e-10	0.155476	5.31149e-05	0.358684	0	0.331119	0	0.409419	0	0.49412	0	0.231388	1.35628e-09	0.427641	0	0.39509	0	0.136925	0.000378915	0.0920501	0.0171596	0.265952	2.60503e-12	0.239475	3.41504e-10	0.278345	2.18714e-13	0.29032	1.77636e-14	0.205235	8.33963e-08	-0.0612927	0.112955	-0.106695	0.00570144	0.470831	0	0.352367	0	0.538487	0	0.334173	0	0.389033	0	0.404629
TTBK1	0.462988	0	0.538043	0	0.565852	0	0.298855	2.66454e-15	0.228494	2.19471e-09	0.521347	0	0.656204	0	0.688839	0	0.1989	2.0948e-07	0.364165	0	0.611085	0	0.549804	0	0.666404	0	0.766928	0	0.599499	0	0.562978	0	0.248717	6.63327e-11	0.114942	0.00288691	-0.1073	0.00543187	0.0420804	0.27674	-0.24302	1.83589e-10	0.117125	0.00239349	-0.243222	1.77169e-10	0.00682388	0.860055	0.396392
TTBK2	0.657249	0	0.776961	0	0.478741	0	0.271458	8.80185e-13	0.258612	1.06459e-11	0.611658	0	0.659701	0	0.752649	0	0.36467	0	0.234348	8.23506e-10	0.477482	0	0.731431	0	0.571294	0	0.689126	0	0.712601	0	0.728429	0	0.334995	0	0.107617	0.00529516	-0.00651854	0.866257	-0.0959598	0.0129567	-0.328099	0	-0.129665	0.000767531	-0.424453	0	-0.0943733	0.0145381	0.506979
p < 0.05 indicated a significant difference.
[truncated: 43 more columns]

## Sheet: Table S5
Table S5. Node degree of MPERG interaction network from STRING database. Related to Figure 3E.
Node	Identifier	Node degree
MAPRE1	9606.ENSP00000364721	18
CKAP5	9606.ENSP00000432768	17
MAPRE3	9606.ENSP00000233121	16
KIF2C	9606.ENSP00000361298	10
KIF11	9606.ENSP00000260731	10
CLIP1	9606.ENSP00000479322	10
MAPRE2	9606.ENSP00000300249	8
DCTN1	9606.ENSP00000354791	8
PAFAH1B1	9606.ENSP00000380378	7
CLASP1	9606.ENSP00000263710	7
SPAG5	9606.ENSP00000323300	6
KIF18B	9606.ENSP00000465992	6
KIF18A	9606.ENSP00000263181	5
CLIP2	9606.ENSP00000223398	5
CLASP2	9606.ENSP00000417518	5
TACC3	9606.ENSP00000326550	4
CLIP4	9606.ENSP00000327009	4
APC2	9606.ENSP00000442954	4
APC	9606.ENSP00000257430	3
STIM1	9606.ENSP00000478059	2
MACF1	9606.ENSP00000354573	2
KNSTRN	9606.ENSP00000249776	2
GAS2L1	9606.ENSP00000481012	2
DST	9606.ENSP00000307959	2
CDK5RAP2	9606.ENSP00000343818	2
SRCIN1	9606.ENSP00000484715	1
SLAIN2	9606.ENSP00000264313	1
PPP1R13L	9606.ENSP00000403902	1
TTBK2	9606.ENSP00000267890	0
TTBK1	9606.ENSP00000259750	0
TRIO	9606.ENSP00000339299	0
SYBU	9606.ENSP00000407118	0
SLAIN1	9606.ENSP00000400921	0
PSRC1	9606.ENSP00000358925	0
NCKAP5L	9606.ENSP00000337998	0
NCKAP5	9606.ENSP00000387128	0
NAV3	9606.ENSP00000381007	0
NAV2	9606.ENSP00000379396	0
NAV1	9606.ENSP00000356265	0
GAS2L2	9606.ENSP00000474529	0
FILIP1	9606.ENSP00000237172	0
FBXW11	9606.ENSP00000265094	0
CTTNBP2	9606.ENSP00000160373	0
CLIP3	9606.ENSP00000353732	0
CEP104	9606.ENSP00000367476	0
AMER2	9606.ENSP00000426528	0

## Sheet: Table S6
Table S6. GO and KEGG analyses of 46 MPERGs. Related to Figure 3F.
ONTOLOGY	ID	Description	GeneRatio	BgRatio	p value	p.adjust	FDR	geneID	Count
BP	GO:0032886	regulation of microtubule-based process	21/40	218/18670	1.04924e-30	4.32812e-28	2.77773e-28	APC/DCTN1/KIF11/PAFAH1B1/CLIP1/APC2/TACC3/SPAG5/MAPRE2/MAPRE1/MAPRE3/CLASP2/CLASP1/MACF1/CLIP3/CDK5RAP2/SLAIN2/KIF18A/PSRC1/NAV3/TTBK2	21
BP	GO:0044839	cell cycle G2/M phase transition	7/40	266/18670	1.37386e-06	1.9542e-05	1.25418e-05	DCTN1/PAFAH1B1/CKAP5/MAPRE1/FBXW11/CLASP1/CDK5RAP2	7
BP	GO:0034330	cell junction organization	6/40	290/18670	3.28336e-05	0.00036117	0.000231794	APC/DST/MAPRE2/CLASP2/CLASP1/MACF1	6
BP	GO:0019884	antigen processing and presentation of exogenous antigen	4/40	182/18670	0.000607015	0.00443175	0.00284424	DCTN1/KIF11/KIF2C/KIF18A	4
BP	GO:0010631	epithelial cell migration	4/40	351/18670	0.00658407	0.030177	0.0193672	MAPRE2/CLASP2/CLASP1/MACF1	4
BP	GO:0090130	tissue migration	4/40	360/18670	0.00718922	0.0318877	0.0204651	MAPRE2/CLASP2/CLASP1/MACF1	4
BP	GO:0044319	wound healing, spreading of cells	2/40	31/18670	0.00200097	0.0117914	0.00756758	CLASP2/CLASP1	2
CC	GO:0005874	microtubule	29/46	416/19717	1.20139e-37	5.2861e-36	2.99293e-36	APC/DST/DCTN1/KIF11/PAFAH1B1/CLIP1/STIM1/CLIP2/CKAP5/APC2/SPAG5/MAPRE2/KIF2C/MAPRE1/MAPRE3/CLASP2/CLASP1/MACF1/SYBU/CDK5RAP2/SLAIN2/NCKAP5L/KIF18A/PSRC1/NAV3/NAV1/KNSTRN/KIF18B/NCKAP5	29
CC	GO:0031252	cell leading edge	9/46	403/19717	3.21355e-07	2.12095e-06	1.20085e-06	APC/DST/PAFAH1B1/CLIP1/APC2/CLASP2/MACF1/SRCIN1/KIF18A	9
CC	GO:0001726	ruffle	5/46	172/19717	4.89107e-05	0.000280705	0.000158932	APC/CLIP1/CLASP2/MACF1/KIF18A	5
MF	GO:0051010	microtubule plus-end binding	15/43	17/17697	5.16817e-39	2.06727e-37	1.41445e-37	APC/DST/PAFAH1B1/CLIP1/STIM1/CLIP2/CKAP5/MAPRE2/KIF2C/MAPRE1/MAPRE3/CLASP2/CLASP1/KIF18A/TTBK2	15
MF	GO:0016887	ATPase activity	5/43	384/17697	0.00229072	0.0122172	0.00835913	KIF11/KIF2C/MACF1/KIF18A/KIF18B	5
MF	GO:0050839	cell adhesion molecule binding	5/43	499/17697	0.00695549	0.0347775	0.0237951	DST/CKAP5/PPP1R13L/MAPRE1/MACF1	5
MF	GO:0048156	tau protein binding	3/43	45/17697	0.000176583	0.00156963	0.00107396	DCTN1/TTBK1/TTBK2	3
KEGG	hsa04390	Hippo signaling pathway	3/8	157/8076	0.000375733	0.00615769	0.00250908	APC/APC2/FBXW11	3
KEGG	hsa04310	Wnt signaling pathway	3/8	160/8076	0.000397271	0.00615769	0.00250908	APC/APC2/FBXW11	3
KEGG	hsa04550	Signaling pathways regulating pluripotency of stem cells	2/8	143/8076	0.00812896	0.0294463	0.0119985	APC/APC2	2
KEGG	hsa04810	Regulation of actin cytoskeleton	2/8	218/8076	0.0182432	0.0471283	0.0192034	APC/APC2	2
p < 0.05 indicated a significant difference.

## Sheet: Table S7
Table S7. GSEA analyses of cluster-associated DEGs. Related to Figure 4H.
ID	Description	setSize	enrichmentScore	NES	pvalue	p.adjust	qvalues	rank	leading_edge	core_enrichment
HALLMARK	HALLMARK_EPITHELIAL_MESENCHYMAL_TRANSITION	199	0.704841	2.79084	0.00141844	0.0037733	0.000953255	2228	tags=58%, list=13%, signal=51%	IGFBP2/TIMP1/EMP3/POSTN/NNMT/COL3A1/COL1A1/FMOD/TNFRSF12A/COL4A1/SERPINE1/PTX3/COL6A2/PDLIM4/COL4A2/COL1A2/VIM/SERPINH1/VEGFA/SPP1/TGFBI/COL5A2/IGFBP3/LOX/CXCL8/PCOLCE/LUM/MGP/EFEMP2/COL5A1/CTHRC1/LGALS1/ADAM12/TNFRSF11B/LOXL1/BGN/FSTL1/PLAUR/MMP14/SFRP4/SDC1/CAPG/MEST/ITGA5/FN1/THBS1/IGFBP4/TNC/GPX7/LAMC1/MMP2/GADD45A/LOXL2/COL6A3/CD44/MXRA5/MYL9/FBLN5/SNAI2/IL32/CALU/FBLN1/ITGB3/TAGLN/ACTA2/ELN…
HALLMARK	HALLMARK_E2F_TARGETS	200	0.695081	2.75487	0.00141643	0.0037733	0.000953255	3147	tags=60%, list=18%, signal=50%	MYBL2/CDC20/BIRC5/PTTG1/ASF1B/RRM2/CCNB2/AURKB/TOP2A/CDCA8/MELK/KIF2C/TK1/DLGAP5/SPC24/CDKN2C/KIF4A/CDK1/CDKN3/CKS2/DEPDC1/WEE1/AURKA/UBE2S/UBE2T/TACC3/CENPM/BUB1B/PLK1/TRIP13/RAD51AP1/HMMR/CHEK1/GINS1/ESPL1/TCF19/CKS1B/MCM2/PCNA/MKI67/EZH2/LMNB1/SMC4/MAD2L1/KPNA2/CDK4/PRDX4/CENPE/MXD3/SPC25/E2F8/RPA3/RFC2/CHEK2/CDCA3/ORC6/HMGB2/TIMELESS/SPAG5/NME1/KIF18B/PLK4/TFRC/RACGAP1/CDC25A/AK2/H2AX/SNRPB/M…
HALLMARK	HALLMARK_G2M_CHECKPOINT	199	0.695328	2.75317	0.00141844	0.0037733	0.000953255	1880	tags=44%, list=11%, signal=40%	MYBL2/UBE2C/CDC20/BIRC5/PTTG1/PBK/CCNB2/HOXC10/AURKB/TOP2A/CENPA/KIF2C/CDKN2C/TPX2/NDC80/TROAP/KIF4A/CCNA2/CDC45/CDK1/NEK2/CDKN3/CKS2/BUB1/KIF23/AURKA/TTK/UBE2S/TACC3/GINS2/CENPF/EXO1/CDC6/PLK1/BCL3/HMMR/H2BC12/CHEK1/ESPL1/E2F1/CKS1B/MCM2/MKI67/EZH2/LMNB1/E2F2/SMC4/MAD2L1/KPNA2/CDK4/CENPE/RAD54L/DTYMK/STIL/KIF15/KNL1/ORC6/ATF5/PLK4/RACGAP1/CDC25A/DBF4/HMGN2/TRAIP/H2AX/FBXO5/KIF11/MCM6/MCM5/H2AZ1/…
HALLMARK	HALLMARK_TNFA_SIGNALING_VIA_NFKB	198	0.625639	2.47871	0.00141243	0.0037733	0.000953255	2420	tags=47%, list=14%, signal=41%	CXCL10/SERPINE1/G0S2/PTX3/TNFAIP6/SOCS3/VEGFA/PLAU/LIF/PLAUR/PHLDA2/CLCF1/NAMPT/CCL2/TGIF1/CEBPD/FOSL1/CXCL11/TNC/BCL2A1/SOD2/F3/BCL3/GADD45A/CCL5/DUSP5/CD44/ATF3/ICAM1/IRF1/CCN1/JAG1/DUSP4/IFNGR2/BTG3/EGR1/SERPINB8/RCAN1/TRIP10/MAP2K3/SAT1/RELB/ZFP36/TNFAIP2/LITAF/GEM/IL6/CCL20/TNFAIP8/TLR2/PTGER4/GPR183/CD69/JUNB/CEBPB/PPP1R15A/CDKN1A/IL18/BIRC3/SPHK1/SDC4/HES1/IER5/TAP1/KLF10/AREG/GCH1/IFIH1/P…
HALLMARK	HALLMARK_APOPTOSIS	160	0.583628	2.28152	0.00140056	0.0037733	0.000953255	2625	tags=46%, list=15%, signal=39%	TIMP1/ANXA1/TNFRSF12A/PLAT/LGALS3/TOP2A/LUM/BGN/WEE1/DPYD/CASP4/HMOX1/IFITM3/HSPB1/SOD2/CDK2/TGFB2/MMP2/GADD45A/EMP1/CAV1/CD44/CASP1/CASP6/CD14/ATF3/PRF1/CD2/IRF1/TSPO/ISG20/HMGB2/DCN/BTG3/SAT1/FAS/CASP3/LMNA/IL6/CASP8/BAX/CD69/DAP/GPX1/CDKN1A/IL18/BIRC3/DDIT3/TAP1/LEF1/CASP7/GCH1/IGFBP6/GSTM1/HGF/TNFSF10/BRCA1/CASP2/IER3/JUN/KRT18/SLC20A1/F2R/ERBB2/PDGFRB/EBP/CDC25B/IL1A/GNA15/GADD45B/NEDD9/BCL1…
HALLMARK	HALLMARK_ANGIOGENESIS	35	0.758646	2.2768	0.00167785	0.0038133	0.00096336	969	tags=43%, list=6%, signal=41%	TIMP1/POSTN/COL3A1/S100A4/VEGFA/SPP1/COL5A2/LUM/STC1/FSTL1/SERPINA5/PDGFA/THBD/JAG1/NRP1
HALLMARK	HALLMARK_HYPOXIA	196	0.559406	2.21482	0.00140449	0.0037733	0.000953255	2806	tags=44%, list=16%, signal=38%	S100A4/SERPINE1/ANXA2/ADM/VEGFA/TGFBI/IGFBP3/LOX/COL5A1/BGN/STC1/PLAUR/KDELR3/LDHA/CAVIN1/HMOX1/F3/LXN/PLIN2/CAV1/CA12/CASP6/ATF3/CXCR4/CAVIN3/CP/ISG20/CCN1/FBP1/TMEM45A/DCN/MT1E/GLRX/TES/ANGPTL4/CHST2/HK2/ZFP36/IL6/PLAC8/PPP1R15A/CDKN1A/AK4/DDIT3/GPC1/SDC4/GCK/PGK1/MT2A/PIM1/TPI1/GBE1/CSRP2/EGFR/PGM2/PDK1/GAPDH/FOSL2/TNFAIP3/HSPA5/SDC2/P4HA2/IER3/JUN/NFIL3/SLC2A3/BHLHE40/FOS/MAFF/CITED2/ENO1/PGM…
HALLMARK	HALLMARK_DNA_REPAIR	147	0.509726	1.96191	0.00145773	0.0037733	0.000953255	5344	tags=56%, list=31%, signal=39%	TYMS/RAD51/PCNA/ZWINT/RPA3/RFC2/NME1/POLR2I/RFC4/POLD1/RFC3/BCAM/PNP/LIG1/POLR2J/HCLS1/PDE6G/POLA2/DDB2/TAF13/SEC61A1/CMPK2/CANT1/TARBP2/ALYREF/TAF12/TP53/POLR2H/POLR1D/POLD3/TMED2/POLR2G/ITPA/SF3A3/ERCC1/POLE4/CDA/FEN1/RPA2/PRIM1/CCNO/BCAP31/CLP1/CETN2/ADRM1/APRT/NT5C3A/SDCBP/NT5C/DGUOK/GTF2B/COX17/STX3/NME3/GTF2A2/GPX4/RAE1/VPS37B/GUK1/SAC3D1/RFC5/POLR1C/TAF9/POLR3C/NME4/DAD1/MPC2/POLR2C/POLR2D…
HALLMARK	HALLMARK_P53_PATHWAY	196	0.434024	1.7184	0.00140449	0.0037733	0.000953255	3163	tags=35%, list=18%, signal=29%	S100A4/STEAP3/LIF/RGS16/SDC1/TM4SF1/HMOX1/S100A10/SOCS1/UPP1/GADD45A/PDGFA/CASP1/PCNA/ATF3/VAMP8/ST14/EPHA2/H1-2/PROCR/SAT1/PLK3/SERTAD3/AEN/FAS/TRIB3/H2AJ/BAX/PPP1R15A/CDKN1A/DDIT3/TGFB1/SPHK1/IER5/TAP1/FUCA1/TRIAP1/VDR/PHLDA3/MDM2/IER3/DDB2/ITGB4/JUN/SEC61A1/BAK1/FOS/TRAF4/F2R/HDAC3/TP53/CEBPA/CTSD/DRAM1/IL1A/RAP2B/EPS8L2/RNF19B/MAPKAPK3/SFN/DEF6/RPL36/SLC35D1/RPS27L/RRAD/HBEGF/WRAP73/HINT1
HALLMARK	HALLMARK_INTERFERON_GAMMA_RESPONSE	199	0.661487	2.61918	0.00141844	0.0037733	0.000953255	3571	tags=63%, list=21%, signal=51%	METTL7B/CXCL10/TNFAIP6/SOCS3/SERPING1/C1R/HLA-DQA1/HLA-DRB1/NAMPT/CD74/CCL2/CASP4/CXCL11/PLSCR1/IFITM3/SOD2/SECTM1/SOCS1/UPP1/ISG15/CCL5/C1S/BST2/VAMP5/CXCL9/HLA-B/HLA-DMA/CASP1/HLA-A/IFI44/FPR1/VAMP8/CFH/GZMA/MYD88/ICAM1/OAS2/OASL/MX1/IRF1/NMI/PSMB9/PSMB8/ISG20/PARP12/EPSTI1/LATS2/IFITM2/SAMD9L/B2M/IRF7/FCGR1A/OAS3/ST8SIA4/FAS/CASP3/TRIM21/PLA2G4A/TNFAIP2/CD40/LGALS3BP/IL6/MX2/CASP8/FGL2/RSAD2/C…
HALLMARK	HALLMARK_COAGULATION	126	0.658508	2.49417	0.00149031	0.0037733	0.000953255	2158	tags=43%, list=13%, signal=38%	TIMP1/ANXA1/MMP9/SERPINE1/PLAT/PLAU/SERPING1/C1R/MMP14/SERPINA1/GNG12/FN1/THBS1/F3/MMP2/S100A13/C1S/DUSP6/MMP11/CFH/ANG/ITGB3/MMP7/C1QA/THBD/CFI/CPQ/C3/APOC1/F2RL2/PRSS23/C2/CFD/CTSK/LEFTY2/VWF/CAPN5/PROS1/RGN/ITGA2/PECAM1/TFPI2/P2RY1/DPP4/BMP1/CTSB/PLEK/GNB2/MAFF/ARF4/OLR1/A2M/MMP1/ADAM9
HALLMARK	HALLMARK_INTERFERON_ALPHA_RESPONSE	97	0.675485	2.47243	0.00154083	0.0037733	0.000953255	3070	tags=65%, list=18%, signal=54%	CXCL10/CD74/CXCL11/PLSCR1/IFITM3/ISG15/C1S/BST2/OAS1/CASP1/IFI44/TENT5A/OASL/MX1/IRF1/NMI/PSMB9/PSMB8/ISG20/PARP12/GBP2/HLA-C/EPSTI1/IFITM2/SAMD9L/B2M/PROCR/IRF7/PARP9/LPAR6/TRIM21/TRIM5/SAMD9/GMPR/LGALS3BP/CASP8/RSAD2/IFI35/LAP3/TAP1/BATF2/IFIH1/WARS1/MOV10/PSME2/RTP4/CMPK2/IFI27/CCRL2/SP110/TRIM14/LAMP3/IL7/USP18/TMEM140/IFITM1/GBP4/IL4R/MVB12A/HELZ2/IFI44L/DHX58/UBA7
HALLMARK	HALLMARK_INFLAMMATORY_RESPONSE	197	0.567496	2.24934	0.00140845	0.0037733	0.000953255	3562	tags=53%, list=21%, signal=43%	TIMP1/PDPN/EMP3/CXCL10/SERPINE1/TNFAIP6/ADM/CXCL8/CLEC5A/LIF/MSR1/PLAUR/MMP14/RGS16/NAMPT/OSMR/ITGA5/CCL2/CXCL11/F3/CCL5/BST2/C5AR1/CXCL9/CD14/FPR1/ITGB3/ICAM1/IRF1/NMI/HAS2/AHR/RGS1/IFNGR2/IRF7/AQP9/CD48/HRH1/CHST2/MARCO/OSM/CD40/IL6/CCL20/TLR2/CD70/PTGER4/ADGRE1/GPR183/CD69/CDKN1A/MET/IL18/SPHK1/TLR1/STAB1/LCP2/LYN/GCH1/IRAK2/TNFSF10/IL2RB/FZD5/PTGIR/IL7R/RTP4/CYBB/CCRL2/GNAI3/OLR1/DCBLD2/SGMS2…
HALLMARK	HALLMARK_IL6_JAK_STAT3_SIGNALING	83	0.626695	2.22066	0.00158479	0.0037733	0.000953255	3931	tags=61%, list=23%, signal=48%	PLA2G2A/TNFRSF12A/CXCL10/SOCS3/OSMR/HMOX1/CXCL11/SOCS1/CXCL9/CD44/TNFRSF1A/CD14/ITGB3/MYD88/IRF1/IFNGR2/ITGA4/FAS/IL2RA/IL6/LTBR/TLR2/TGFB1/PIM1/IL1R2/ACVRL1/STAT1/CCR1/JUN/BAK1/IL2RG/CD36/CXCL1/IL13RA1/A2M/IL7/CD9/TNFRSF1B/IL4R/IL1B/CSF3R/PTPN2/CXCL13/CSF2RB/MAP3K8/IL1R1/IL15RA/CXCL3/PIK3R5/LTB/STAT3
HALLMARK	HALLMARK_KRAS_SIGNALING_DN	174	-0.351232	-1.49637	0.00333333	0.00694444	0.00175439	2477	tags=26%, list=14%, signal=23%	ABCG4/CLSTN3/CELSR2/ALOX12B/TENM2/BMPR1B/SLC25A23/CAPN9/PRKN/DCC/ADRA2C/STAG3/SLC16A7/KMT2D/NOS1/NGB/SNN/GDNF/SLC30A3/SIDT1/TAS2R4/THRB/NUDT11/NRIP2/KLK7/CNTFR/TLX1/MAST3/RYR2/RYR1/EFHD1/P2RX6/CAMK1D/MFSD6/GRID2/MACROH2A2/KCNN1/KCNQ2/ZBTB16/MYH7/RGS11/CPEB3/ARHGDIG/SPTBN2/SNCB/ARPP21
KEGG	KEGG_CELL_CYCLE	124	0.643215	2.40823	0.00146843	0.0122452	0.00808236	2642	tags=43%, list=15%, signal=36%	CDC20/PTTG1/CCNB2/CCNB1/CDKN2C/CCNA2/CDC45/CDK1/BUB1/WEE1/TTK/ORC1/CDC6/CDC25C/BUB1B/CDK2/TGFB2/PLK1/GADD45A/CHEK1/ESPL1/E2F1/MCM2/PCNA/E2F2/MAD2L1/CDK4/CHEK2/ORC6/PKMYT1/CDC25A/DBF4/CDK6/MCM6/MCM5/MAD2L2/HDAC1/CDKN1A/TGFB1/MCM4/MCM3/CCNE1/CDC7/MDM2/ANAPC11/RBL1/ORC5/TP53/CDC25B/GADD45B/MCM7/TGFB3/SFN
KEGG	KEGG_ECM_RECEPTOR_INTERACTION	82	0.665277	2.33317	0.00153139	0.0122452	0.00808236	2136	tags=49%, list=12%, signal=43%	COL3A1/COL1A1/COL4A1/COL6A2/IBSP/COL4A2/COL1A2/SPP1/COL5A2/COL5A1/SDC1/ITGA5/FN1/THBS1/TNC/LAMC1/LAMB1/HMMR/COL6A3/HSPG2/CD44/ITGB3/ITGA7/LAMC3/COL6A1/ITGA3/LAMA2/VWF/ITGA4/ITGA1/LAMA4/ITGA2/SDC4/LAMB2/ITGB1/THBS3/SDC2/ITGB4/CD36/THBS4
KEGG	KEGG_P53_SIGNALING_PATHWAY	67	0.604912	2.05937	0.0015528	0.0122452	0.00808236	2420	tags=43%, list=14%, signal=37%	SERPINE1/STEAP3/RRM2/CCNB2/IGFBP3/CCNB1/CDK1/GTSE1/THBS1/CDK2/GADD45A/CHEK1/CDK4/CHEK2/CDK6/TP73/FAS/CASP3/CASP8/BAX/TP53I3/CDKN1A/SHISA5/CCNE1/MDM2/DDB2/TP53/TNFRSF10B/GADD45B
KEGG	KEGG_FOCAL_ADHESION	196	0.475587	1.88181	0.00140647	0.0122452	0.00808236	2136	tags=32%, list=12%, signal=28%	COL3A1/COL1A1/COL4A1/COL6A2/IBSP/COL4A2/COL1A2/VEGFA/SPP1/COL5A2/COL5A1/VAV3/FLNC/ITGA5/FN1/THBS1/TNC/MYL12A/ACTN1/LAMC1/LAMB1/PDGFD/COL6A3/PDGFA/RAC2/CAV1/ZYX/MYL9/CAV2/ITGB3/ITGA7/FLNA/LAMC3/COL6A1/ITGA3/SHC1/LAMA2/VWF/ITGA4/VASP/ITGA1/LAMA4/ITGA2/RAP1B/MET/BIRC3/MYL12B/CDC42/LAMB2/EGFR/HGF/PPP1CA/PARVG/ITGB1/THBS3/ACTB/ITGB4/JUN/ACTN4/ERBB2/FLT4/THBS4
KEGG	KEGG_JAK_STAT_SIGNALING_PATHWAY	123	0.441817	1.65074	0.00148588	0.0122452	0.00808236	4046	tags=37%, list=24%, signal=29%	IL13RA2/SOCS3/LIF/SPRY4/SPRY1/CLCF1/SOCS2/OSMR/SOCS1/CISH/CTF1/IFNGR2/SPRY2/OSM/IL2RA/IL6/PIM1/IL2RB/STAT1/IL7R/JAK3/IL2RG/IL13RA1/SPRED2/PTPN6/IL7/STAT5A/PIK3CG/IL10RA/IL4R/SPRED1/CSF3R/CSF3/IL11/CSF2RB/IL15/AKT2/IL15RA/IL10/IFNLR1/IL20RA/PIK3R5/EPO/STAT3/STAT6/IFNAR2
KEGG	KEGG_COMPLEMENT_AND_COAGULATION_CASCADES	61	0.717119	2.40406	0.00157233	0.0122452	0.00808236	1311	tags=41%, list=8%, signal=38%	SERPINE1/PLAT/PLAU/SERPING1/C1R/PLAUR/SERPINA1/SERPINA5/F13A1/F3/C1S/C5AR1/TFPI/C1QB/CFH/C1QA/THBD/CFI/C3/C1QC/C2/CFD/VWF/PROS1/BDKRB2
KEGG	KEGG_INTESTINAL_IMMUNE_NETWORK_FOR_IGA_PRODUCTION	43	0.705573	2.20459	0.00164474	0.0122452	0.00808236	1359	tags=42%, list=8%, signal=39%	HLA-DRA/HLA-DQA1/HLA-DRB1/HLA-DPB1/HLA-DPA1/HLA-DQB1/HLA-DQA2/HLA-DMB/HLA-DMA/HLA-DOA/HLA-DRB5/CXCR4/ITGA4/CD40/IL6/LTBR/TNFSF13B/TGFB1
KEGG	KEGG_HEMATOPOIETIC_CELL_LINEAGE	79	0.596844	2.0871	0.00151745	0.0122452	0.00808236	2819	tags=44%, list=16%, signal=37%	HLA-DRA/HLA-DRB1/ITGA5/CD44/CD14/HLA-DRB5/ITGB3/CD2/CD3D/ANPEP/TFRC/FCGR1A/ITGA3/ITGA4/ITGA1/IL2RA/CD3E/IL6/ITGA2/IL1R2/IL7R/CD36/CD37/CD34/CD8A/CD4/IL7/IL1A/CD7/CD33/CD9/IL4R/IL1B/CSF3R/CSF3
KEGG	KEGG_ANTIGEN_PROCESSING_AND_PRESENTATION	64	0.614286	2.0683	0.00157729	0.0122452	0.00808236	2419	tags=48%, list=14%, signal=42%	HLA-DRA/HLA-DQA1/HLA-DRB1/HSPA6/HLA-DPB1/HLA-DPA1/HLA-DQB1/CD74/HLA-DQA2/HLA-DMB/HLA-B/HLA-DMA/HLA-DOA/HLA-A/HLA-DRB5/HLA-C/B2M/CTSS/CALR/TAP1/HLA-F/CTSB/CIITA/CTSL/PDIA3/PSME2/HSPA5/CD8A/CD4/HLA-E/HSPA1B
KEGG	KEGG_CYTOKINE_CYTOKINE_RECEPTOR_INTERACTION	220	0.514628	2.06603	0.00137363	0.0122452	0.00808236	4046	tags=46%, list=24%, signal=36%	TNFRSF12A/CXCL10/VEGFA/CXCL8/LIF/TNFRSF11B/CLCF1/OSMR/CCL2/CXCL11/IL1RAP/TGFB2/CCL5/PDGFA/CXCL9/TNFRSF1A/NGFR/TNFRSF19/CXCL14/CXCR4/TNFRSF14/CTF1/IFNGR2/CCR5/TNFRSF4/FAS/OSM/IL2RA/CD40/IL6/LTBR/CCL20/TNFSF13B/CD70/MET/IL18/TGFB1/IL1R2/EGFR/HGF/TNFSF10/IL2RB/ACVRL1/TNFRSF10C/TNFSF14/TNFRSF10D/IL7R/CCR1/IL2RG/CXCL1/CCL18/IL13RA1/FLT4/CCL8/EDA2R/TNFRSF10B/PDGFRB/TNFRSF18/IL7/CCL26/IL1A/CXCL6/PPBP/IL…
KEGG	KEGG_MAPK_SIGNALING_PATHWAY	256	-0.289454	-1.30201	0.0114504	0.0431008	0.0284483	2293	tags=25%, list=13%, signal=22%	CACNA1H/MAP4K4/TAOK3/MAPK9/PRKACB/RPS6KA2/MAP2K6/CACNB4/HSPA2/DUSP7/CACNA1D/MAPK8IP1/FGF14/SOS2/TAOK1/CACNB2/FLNB/CACNB1/CACNG7/CACNG4/PTPRR/PLA2G6/PPP3CA/DUSP8/PRKX/CACNA1C/RPS6KA5/GADD45G/FGF9/FGF17/NF1/AKT3/MAPK8/MAPK8IP3/PPP3CB/RAPGEF2/RASGRF2/PDGFRA/RPS6KA6/MAPK10/MAP3K5/CACNA1A/PRKCA/CACNG8/PTPN5/CACNA2D2/CACNA2D1/CACNA1E/CACNA1I/ARRB1/CACNA2D3/FGF13/DUSP9/CACNA1B/MAPK8IP2/FGF12/MAPT/PRKCG/…
KEGG	KEGG_GAP_JUNCTION	88	-0.384829	-1.49395	0.00892857	0.0359302	0.0237154	2190	tags=30%, list=13%, signal=26%	PRKACB/ADCY1/TUBA4A/SOS2/ITPR2/GUCY1A2/DRD1/PLCB4/PRKX/ADCY8/HTR2C/GUCY1A1/GJD2/PDGFRA/GRM5/GRM1/PRKCA/GNAI1/PRKG2/ADCY2/HTR2A/ADCY5/PRKCG/PLCB1/TUBB4A/PRKCB
KEGG	KEGG_WNT_SIGNALING_PATHWAY	148	-0.378952	-1.58122	0.00331126	0.0171842	0.0113422	3808	tags=38%, list=22%, signal=30%	MYC/ROCK1/WNT9A/FZD9/RAC3/PORCN/CHP1/NLK/PPP2R5C/SMAD3/GSK3B/CTBP2/PRICKLE1/FRAT2/WNT7A/WNT5B/VANGL2/TCF7L2/FBXW11/AXIN2/CHD8/LRP6/MAPK9/PRKACB/CSNK1E/CAMK2B/PRICKLE2/WNT3/CREBBP/SFRP1/EP300/NFAT5/APC/PLCB4/WIF1/PPP3CA/PRKX/PPP2R5A/FRAT1/WNT10B/MAPK8/BTRC/PPP3CB/APC2/MAPK10/PRKCA/CAMK2G/CXXC4/PRKCG/NKD1/PLCB1/CAMK2A/PRKCB/WNT7B/DAAM2/SFRP2
KEGG	KEGG_ERBB_SIGNALING_PATHWAY	87	-0.408191	-1.58536	0.00593472	0.0266948	0.0176196	3588	tags=41%, list=21%, signal=33%	STAT5B/BRAF/SRC/PTK2/SOS1/PAK6/GSK3B/CDKN1B/CRKL/CBLB/MAP2K4/PIK3CA/MAPK1/CBL/PIK3CB/MAPK9/ABL2/TGFA/SHC2/CAMK2B/SOS2/SHC3/ERBB3/AKT3/MAPK8/MAPK10/PIK3R1/PRKCA/CAMK2G/ERBB4/PAK3/PRKCG/CAMK2A/PAK5/PRKCB/NRG3
KEGG	KEGG_CALCIUM_SIGNALING_PATHWAY	175	-0.53377	-2.28877	0.00331126	0.0171842	0.0113422	2305	tags=34%, list=13%, signal=30%	DRD5/CACNA1H/HTR6/PRKACB/ADRB2/TRPC1/CAMK2B/ADCY1/CACNA1D/ITPR2/EDNRB/PDE1B/NOS1/ADRA1B/HTR5A/DRD1/PLCB4/PPP3CA/PRKX/CACNA1C/ADCY8/ERBB3/HTR2C/PPP3CB/CCKBR/PDGFRA/GRM5/RYR2/TACR1/CAMK4/ADRA1A/CACNA1A/GRM1/PRKCA/RYR1/P2RX6/CAMK2G/PDE1A/GRIN2A/GRIN2C/CACNA1E/CACNA1I/P2RX7/ATP2B2/CD38/ADCY2/ERBB4/CACNA1B/HTR2A/PRKCG/ATP2B3/SLC8A3/PLCB1/CAMK2A/CHRM1/PRKCB/GNAL/SLC8A2/GRIN1
p < 0.05 indicated a significant difference.

## Sheet: Table S8
Table S8 Correlations between risk signature and TME infiltration using ssGSEA and ESTIMATE algorithm in glioma from TCGA database. Related to Figure 8A, B.
		B cell	T cell	CD8 T	CTL	CD4 Th	CD4 Th1	CD4 Th2	CD4 Th17	CD4 Tfh	CD4 Treg	Tgd	Tcm	Tem	NK cell	NK CD56bright	NK CD56dim	DC	pDC	iDC	aDC	Macrophage	Neutrophil	Eosinophil	Mast cell	StromalScore	ImmuneScore	ESTIMATEScore
CTTNBP2	Cor	-0.103964	-0.42464	0.242988	-0.372196	0.244907	-0.219824	-0.198854	-0.1829	0.229052	0.0536084	0.551132	0.439965	0.197763	-0.378794	-0.113826	-0.381688	-0.0909749	0.353569	-0.426536	-0.363473	-0.586689	-0.484531	-0.492534	-0.125952	-0.580854	-0.476178	-0.527985
	p	0.00711765	0	1.90482e-10	0	1.35643e-10	9.16244e-09	2.15297e-07	1.9159e-06	2.05717e-09	0.166056	0	0	2.51495e-07	0	0.00319639	0	0.0185951	0	0	0	0	0	0	0.00109592	0	0	0
NAV1	Cor	-0.0540726	-0.259655	0.200527	-0.29202	0.233367	-0.0557667	-0.00388057	-0.108108	0.236101	0.126059	0.447373	0.437186	0.219192	-0.233782	-0.040154	-0.198636	-0.0963938	0.168939	-0.38738	-0.19667	-0.431842	-0.384662	-0.333518	-0.0788913	-0.459567	-0.446723	-0.461236
NAV1	p	0.162415	9.05653e-12	1.69366e-07	1.28786e-14	1.00071e-09	0.149633	0.920198	0.00512316	6.29116e-10	0.00108511	0	0	1.01256e-08	9.32969e-10	0.299708	2.22089e-07	0.0126179	1.11765e-05	0	2.93593e-07	0	0	0	0.0413611	0	0	0
SRCIN1	Cor	-0.0256012	-0.208438	-0.00590927	-0.24751	-0.319499	0.000181913	-0.288188	-0.0988561	0.323971	0.167866	0.00971794	0.155233	-0.0041931	-0.00864875	0.420974	-0.0692907	-0.0719447	0.190969	-0.299706	-0.362613	-0.441194	-0.380274	-0.283703	0.176116	-0.423703	-0.475223	-0.468079
SRCIN1	p	0.508583	5.29717e-08	0.878746	8.51792e-11	0	0.996253	2.93099e-14	0.0105154	0	1.27267e-05	0.801899	5.52891e-05	0.913796	0.823313	0	0.0732922	0.0629161	6.48916e-07	2.22045e-15	0	0	0	7.50511e-14	4.59242e-06	0	0	0
TTBK2	Cor	0.0418558	-0.282416	0.0253959	-0.310245	0.1133	-0.0267736	-0.250596	-0.134817	0.413275	0.146143	0.407593	0.500772	0.200911	-0.194771	0.253497	-0.312281	-0.115132	0.107744	-0.408086	-0.326476	-0.514556	-0.445263	-0.318905	0.0861637	-0.533248	-0.583846	-0.580168
TTBK2	p	0.279675	9.83658e-14	0.51199	2.22045e-16	0.00334106	0.489359	4.8741e-11	0.000471414	0	0.000148653	0	0	1.60245e-07	3.8334e-07	2.86373e-11	0	0.00286142	0.00527531	0	0	0	0	0	0.0258401	0	0	0
TRIO	Cor	-0.123505	-0.0743479	0.0322461	-0.130847	0.301635	0.00828276	0.367226	-0.0809665	-0.0854712	-0.127147	0.181483	0.147375	0.0250413	0.0325035	-0.134423	-0.0143714	-0.191501	-0.0677846	-0.171765	0.0703854	0.0172279	-0.0173856	0.0616641	-0.176178	-0.0655509	-0.0890469	-0.0801146
TRIO	p	0.00137066	0.0545962	0.405012	0.000692279	1.55431e-15	0.830674	0	0.0362846	0.0270616	0.000981048	2.30591e-06	0.00013044	0.517901	0.401271	0.000489964	0.710607	6.03258e-07	0.0797759	7.90858e-06	0.0688547	0.656464	0.653524	0.111053	4.55657e-06	0.090241	0.0212523	0.0383006
KIF18A	Cor	-0.0478505	0.230766	-0.270745	0.104593	0.258632	0.0426429	0.818615	0.0319665	-0.289033	-0.154408	-0.181861	-0.183418	-0.210157	0.0959024	-0.328295	0.139877	-0.152227	-0.416603	0.183258	0.328691	0.453583	0.332078	0.390159	-0.123867	0.406345	0.348736	0.38169
KIF18A	p	0.21644	1.54783e-09	1.05471e-12	0.00677577	1.09881e-11	0.270724	0	0.409099	2.44249e-14	6.06231e-05	2.19495e-06	1.78975e-06	4.08925e-08	0.0130794	0	0.000284506	7.71581e-05	0	1.82778e-06	0	0	0	0	0.00132642	0	0	0
SLAIN2	Cor	0.0259682	0.206748	-0.116409	0.0856275	0.486196	0.11878	0.526403	0.176177	-0.0904424	-0.16548	0.123502	0.123932	0.0356031	0.114549	-0.392072	0.0823053	-0.0937673	-0.432308	0.151919	0.299334	0.439012	0.347349	0.35751	-0.0855592	0.369591	0.308552	0.341868
SLAIN2	p	0.502523	6.81597e-08	0.00256517	0.0267816	0	0.00208819	0	4.55708e-06	0.0192983	1.69382e-05	0.0013711	0.00131865	0.357863	0.00300687	0	0.0332988	0.0152618	0	7.98132e-05	2.66454e-15	0	0	0	0.0269037	0	4.44089e-16	0
Risk score	Cor	0.00766428	0.365458	-0.28972	0.252291	0.0573389	0.112674	0.608654	0.136277	-0.346654	-0.221738	-0.385539	-0.375126	-0.262563	0.307993	-0.218143	0.301929	-0.0900613	-0.466415	0.350483	0.371612	0.637817	0.495515	0.529258	-0.0510284	0.608839	0.534348	0.577295
Risk score	p	0.843148	0	2.08722e-14	3.57474e-11	0.138468	0.00352094	0	0.00040822	0	6.757e-09	0	0	5.20317e-12	4.44089e-16	1.19439e-08	1.33227e-15	0.0198158	0	0	0	0	0	0	0.187423	0	0	0
p < 0.05 indicated a significant difference.

## Sheet: Table S9
Table S9 Correlations between risk signature and TME infiltration using xCELL algorithm in glioma from TCGA database. Related to Figure 8C, D.
		B cell	B cell naive	B cell plasma	B cell memory	B cell (class-switched memory)	CD8 T	CD8 T naive	CD8 Tcm	CD8 Tem	CD4 T naive	CD4 T (non-regulatory)	CD4 Tm	CD4 Tcm	CD4 Tem	CD4 Th1	CD4 Th2	CD4 Treg	Tgd cell	NK cell	T cell NK	mDC	amDC	pDC	Monocyte	Macrophage	Macrophage M1	Macrophage M2	Neutrophil	Eosinophil	Mast cell	Hematopoietic stem cell	Common lymphoid progenitor	Common myeloid progenitor	Granulocyte-monocyte progenitor	Endothelial cell	Stromal score	Immune score	TME score
CTTNBP2	Cor	-0.0642319	-0.0134449	0.449866	-0.0994164	-0.0509866	-0.0185457	-0.0809013	-0.106114	0.0840024	-0.0430391	0.00608618	-0.220033	0.0618288	-0.164348	0.218608	-0.249227	0.0599874	0.00761071	0.146062	0.277619	-0.122345	0.160313	-0.145974	-0.308511	-0.334009	-0.373163	-0.338129	0.232384	-0.0763215	0.244107	-0.304419	-0.514087	-0.06	0.00539352	-0.209479	-0.239239	-0.279569	-0.332685
	p	0.0992044	0.73027	0	0.0106022	0.190793	0.63437	0.0377223	0.00635907	0.0309446	0.269545	0.875984	1.11529e-08	0.112531	2.20499e-05	1.39293e-08	8.3944e-11	0.123665	0.845272	0.00016621	3.81917e-13	0.00163839	3.51121e-05	0.000167746	4.44089e-16	0	0	0	1.52555e-09	0.05001	2.07447e-10	1.33227e-15	0	0.123586	0.890003	5.57897e-08	4.81134e-10	2.5735e-13	0
NAV1	Cor	-0.106965	-0.0271815	0.352615	-0.0623707	-0.110385	0.0209971	-0.141217	-0.0982695	0.0597759	0.0354329	0.0560902	-0.169083	0.0574704	-0.140237	0.0128073	-0.19492	0.0420793	-0.0262371	0.0720738	0.267541	-0.0990562	0.0905191	-0.0932241	-0.351534	-0.329349	-0.372694	-0.212702	0.147956	-0.0404135	0.0381167	-0.250118	-0.395328	-0.026864	0.032261	-0.165716	-0.199128	-0.322106	-0.337911
	p	0.00594738	0.485733	0	0.109409	0.00452344	0.590257	0.000273378	0.0115396	0.124997	0.36343	0.150042	1.25931e-05	0.14025	0.000301758	0.742597	4.49826e-07	0.28038	0.501023	0.0642404	2.78844e-12	0.010889	0.0200267	0.016591	0	0	0	3.44239e-08	0.000136251	0.299877	0.328205	7.15643e-11	0	0.490845	0.407986	1.87836e-05	2.4996e-07	0	0
SRCIN1	Cor	-0.0943457	0.0264088	0.0540659	0.00376	0.00574864	0.0338253	-0.205343	-0.128525	-0.0124116	-0.0370963	-0.0729418	-0.195759	0.10399	-0.170045	-0.124323	-0.527809	0.18976	-0.0815818	0.0380544	0.322814	-0.0681616	-0.0926895	-0.193148	-0.475791	-0.350655	-0.492178	0.225335	0.0294689	-0.0025949	-0.187998	0.147536	-0.467124	-0.0492654	0.0545162	-0.301068	-0.392583	-0.420392	-0.494864
	p	0.0153253	0.498224	0.165332	0.923192	0.882811	0.38562	1.02527e-07	0.000935137	0.750283	0.341329	0.0610887	4.00488e-07	0.00750134	1.12172e-05	0.00137296	0	9.08606e-07	0.0361358	0.328998	0	0.0801493	0.0172258	5.73871e-07	0	0	0	4.81497e-09	0.449769	0.94695	1.15017e-06	0.000142424	0	0.206223	0.161833	2.66454e-15	0	0	0
TTBK2	Cor	-0.134871	0.0415877	0.362907	-0.0229802	0.0279492	0.0246808	-0.187409	-0.126496	0.0917351	0.00306077	-0.0449725	-0.196809	0.102317	-0.152471	-0.261063	-0.443714	0.249769	-0.0624	0.110702	0.235381	-0.0816991	0.0419998	-0.16166	-0.466783	-0.38042	-0.535405	-0.0255163	0.102542	-0.132896	-0.079693	-0.0461357	-0.470953	-0.0908254	0.0705639	-0.369748	-0.474109	-0.425674	-0.547819
	p	0.000512323	0.286042	0	0.555639	0.473493	0.526763	1.24388e-06	0.00112723	0.0184122	0.937443	0.2486	3.46065e-07	0.00852591	8.40216e-05	9.58478e-12	0	7.61895e-11	0.109243	0.00440837	9.25242e-10	0.0358683	0.281291	3.00968e-05	0	0	0	0.512861	0.00838145	0.000619625	0.0406851	0.236559	0	0.0196089	0.0700415	0	0	0	0
TRIO	Cor	-0.0552252	0.030057	0.124228	-0.0413926	-0.121355	-0.021492	0.0817374	-0.0321513	-0.0547419	0.0210226	0.00845032	-0.0406158	0.0830585	-0.0328324	0.0701614	0.19771	0.0619198	-0.0142281	-0.0486433	-0.174812	-0.0306073	-0.0381076	-0.0436452	-0.0764219	-0.189734	-0.082123	-0.245835	-0.148326	0.0700113	-0.000340566	-0.23778	0.0353309	-0.0148084	-0.00678692	0.108522	-0.00274824	-0.131245	-0.092032
	p	0.156438	0.440773	0.00138466	0.288311	0.0017883	0.581527	0.0357812	0.409581	0.160101	0.589806	0.828454	0.297462	0.0328874	0.399728	0.0716585	3.05124e-07	0.112002	0.715221	0.212017	6.2632e-06	0.432448	0.328321	0.262852	0.0497086	9.11781e-07	0.0349149	1.5322e-10	0.000131035	0.0722689	0.993032	6.16914e-10	0.364815	0.704144	0.861841	0.0052555	0.94382	0.000724912	0.0180357
KIF18A	Cor	-0.0586917	0.0301306	-0.197136	0.0141739	-0.163228	-0.0316527	0.283252	0.0800084	-0.165096	0.0436316	0.0380007	0.173456	-0.106891	0.0857339	0.145778	0.798928	-0.224023	0.0387298	-0.156057	-0.450109	0.0590042	-0.0612155	0.0729595	0.263998	0.118832	0.321417	-0.0951984	-0.20373	0.125479	-0.0362873	-0.0553272	0.522188	0.0181172	-0.13568	0.233543	0.11559	0.182814	0.205798
	p	0.132001	0.439655	3.30638e-07	0.716261	2.51182e-05	0.416886	1.21236e-13	0.0398932	2.02026e-05	0.263001	0.329681	7.40387e-06	0.00598241	0.0276352	0.000171213	0	5.9394e-09	0.32048	5.66668e-05	0	0.129952	0.116149	0.061026	5.50138e-12	0.00222885	0	0.0144205	1.29565e-07	0.0012367	0.351969	0.155673	0	0.642221	0.00047361	1.25829e-09	0.00294044	2.27225e-06	9.59469e-08
SLAIN2	Cor	0.0221264	0.043538	-0.0905513	-0.0332099	-0.0619636	0.00439894	0.172786	0.0610554	-0.0476644	0.0894526	-0.00191072	0.166835	-0.0989634	0.110294	-0.14571	0.515591	-0.0371597	-0.0127782	-0.136289	-0.375018	0.0448994	0.0609216	0.048386	0.284623	0.196582	0.305963	-0.114217	-0.0324825	0.049121	0.155108	-0.123638	0.470901	0.0211657	-0.0110773	0.106048	0.0467982	0.260453	0.213947
	p	0.570422	0.264028	0.0199824	0.394328	0.111748	0.910191	8.03887e-06	0.117107	0.221369	0.021543	0.960924	1.6461e-05	0.010964	0.00455684	0.000172427	0	0.340504	0.743162	0.000446286	0	0.24937	0.117914	0.214447	9.12603e-14	3.57186e-07	8.88178e-16	0.00329974	0.404773	0.207558	6.29452e-05	0.00146005	0	0.587276	0.776372	0.006392	0.229889	1.07478e-11	2.85074e-08
Risk score	Cor	0.0538256	0.0333593	-0.45535	0.0422672	-0.0361884	0.0120802	0.245295	0.116406	-0.178029	0.0472529	-0.0177456	0.227377	-0.100572	0.140274	0.0193347	0.645916	-0.153323	0.0233351	-0.201537	-0.451273	0.0995416	-0.0874002	0.0947436	0.378691	0.297921	0.45689	0.132472	-0.243809	0.138857	-0.035142	0.111874	0.621574	0.0628289	-0.0592367	0.258485	0.21296	0.332809	0.360876
	p	0.167222	0.392203	0	0.278237	0.353284	0.756736	1.68473e-10	0.002744	4.18893e-06	0.225388	0.649063	3.46511e-09	0.00972687	0.000300615	0.620019	0	7.65707e-05	0.549549	1.77532e-07	0	0.0105041	0.0247429	0.014897	0	5.32907e-15	0	0.000645202	2.18519e-10	0.000346395	0.367385	0.00400591	0	0.106824	0.128443	1.55225e-11	3.31082e-08	0	0
p < 0.05 indicated a significant difference.

## Sheet: Table S10
Table S10 Correlations between risk signature and immunoinhibitors in glioma from TCGA database. Related to Figure 8E.
		ADORA2A	BTLA	CD160	CD244	CD274	CD96	CSF1R	CTLA4	HAVCR2	IDO1	IL10	IL10RB	KDR	KIR2DL1	KIR2DL3	LAG3	LGALS9	PDCD1	PDCD1LG2	TGFB1	TGFBR1	TIGIT	VTCN1	SIGLEC15
CTTNBP2	Cor	0.507164	-0.189812	0.100805	-0.394159	-0.458173	-0.434567	-0.0960129	-0.291344	-0.366716	-0.426138	-0.420884	-0.364412	0.0179605	-0.135725	-0.160011	-0.0217899	-0.3684	-0.349342	-0.52187	-0.401937	-0.0685186	-0.0834127	0.542245	-0.253096
	p	0	7.60116e-07	0.00907796	0	0	0	0.0129743	1.4877e-14	0	0	0	0	0.642849	0.000431116	3.21363e-05	0.573701	0	0	0	0	0.0765601	0.0309902	0	3.08313e-11
NAV1	Cor	0.491633	-0.207096	0.168456	-0.269077	-0.316155	-0.275565	-0.173806	-0.245611	-0.324813	-0.25542	-0.351511	-0.242016	0.207777	-0.0692068	-0.0597241	-0.0248472	-0.31032	-0.222942	-0.424291	-0.33883	0.0430145	0.110679	0.35066	-0.106288
	p	0	6.47194e-08	1.1851e-05	1.46683e-12	0	4.01457e-13	6.1387e-06	1.19666e-10	0	2.00546e-11	0	2.25978e-10	5.84773e-08	0.0736415	0.122769	0.521152	2.22045e-16	5.57127e-09	0	0	0.266567	0.00415452	0	0.00592685
SRCIN1	Cor	0.0977121	-0.324313	-0.164436	-0.136428	-0.324485	-0.342085	-0.246207	-0.21694	-0.336444	-0.410656	-0.420549	-0.468531	-0.179967	-0.118709	-0.166108	-0.203511	-0.282316	-0.313394	-0.489643	-0.429445	-0.299517	-0.0193288	0.0801755	-0.178948
SRCIN1	p	0.0114501	0	1.91717e-05	0.000402147	0	0	1.07587e-10	1.44224e-08	0	0	0	0	2.80709e-06	0.00210116	1.57163e-05	1.09844e-07	1.00364e-13	0	0	0	2.44249e-15	0.617743	0.0381534	3.20076e-06
TTBK2	Cor	0.334112	-0.213567	0.149325	-0.180294	-0.208738	-0.340826	-0.204082	-0.253166	-0.450189	-0.42975	-0.438873	-0.530916	-0.00474261	-0.149852	-0.145093	-0.273276	-0.491643	-0.368327	-0.471978	-0.522631	-0.196475	0.0552026	0.142625	-0.220723
TTBK2	p	0	2.43208e-08	0.000105828	2.69103e-06	5.06412e-08	0	1.01038e-07	3.04385e-11	0	0	0	0	0.902551	9.99663e-05	0.000166043	6.3638e-13	0	0	0	0	3.01787e-07	0.1538	0.000214719	7.94356e-09
TRIO	Cor	0.378346	0.0253438	0.425935	0.0345426	0.187095	0.134311	-0.0493207	0.0136917	-0.000965474	0.178173	-0.0191876	0.260155	0.388262	0.0906572	0.107526	0.195408	-0.0129389	0.141607	0.0654981	0.108902	0.314611	-0.0698982	0.154365	0.112482
TRIO	p	0	0.512855	0	0.372372	1.09769e-06	0.000495359	0.202638	0.723721	0.980115	3.53512e-06	0.620314	8.23785e-12	0	0.0190119	0.0053688	3.50637e-07	0.738339	0.000238448	0.0905012	0.0048042	0	0.0708016	6.09163e-05	0.00357792
KIF18A	Cor	-0.0370921	0.278074	0.287499	0.258872	0.385691	0.45662	0.111168	0.282154	0.406277	0.52368	0.419048	0.643322	0.352356	0.174323	0.158689	0.366076	0.357308	0.423583	0.532616	0.425637	0.579561	-0.0107514	0.0420815	0.315147
KIF18A	p	0.338101	2.40918e-13	3.37508e-14	1.05027e-11	0	0	0.00399051	1.03917e-13	0	0	0	0	0	5.75495e-06	3.74003e-05	0	0	0	0	0	0	0.781341	0.277087	0
SLAIN2	Cor	0.112775	0.371492	0.453165	0.213279	0.474781	0.439927	0.295013	0.264208	0.393809	0.406293	0.398285	0.522537	0.457244	0.107725	0.206541	0.252199	0.275127	0.397376	0.49712	0.41559	0.670264	0.139381	0.10273	0.300713
SLAIN2	p	0.00349135	0	0	2.54185e-08	0	0	6.66134e-15	3.79163e-12	0	0	0	0	0	0.0052834	7.02883e-08	3.636e-11	4.38538e-13	0	0	0	0	0.000299174	0.00783294	1.77636e-15
Risk score	Cor	-0.276906	0.329938	0.164807	0.384271	0.523948	0.54842	0.226936	0.366272	0.544181	0.570374	0.53117	0.671003	0.198007	0.172847	0.201812	0.298718	0.507224	0.492092	0.66516	0.578519	0.48281	-0.0444753	-0.191036	0.328174
Risk score	p	3.05755e-13	0	1.83494e-05	0	0	0	2.91434e-09	0	0	0	0	0	2.42917e-07	6.91722e-06	1.40662e-07	3.10862e-15	0	0	0	0	0	0.25065	6.4306e-07	0
p < 0.05 indicated a significant difference.

[truncated: 1 more sheets: Table S11]
